# Supplementary material for: DriverFinder: A Gene Length-Based Network Method to Identify Cancer Driver Genes
Source: Hindawi journal article supplement (doi:10.1155/2017/4826206), 2017-01-01
Supplement: f1 [file 4826206.f1.xlsx]

## Sheet: BRCA
Table S1 The results of BRCA
	rank	gene	mut	p-value
PIK3CA	1	PIK3CA	345	0
MYC	2	MYC	214	0
CCND1	3	CCND1	154	0.000155123
FH	4	FH	139	0.000775615
PNMT	5	PNMT	120	0.0020166
IKBKB	6	IKBKB	112	0.00240441
PAK1	7	PAK1	82	0.00535174
AKT3	8	AKT3	146	0.00729078
HGSNAT	9	HGSNAT	105	0.00775615
NDUFC2	10	NDUFC2	76	0.0102381
RB1	11	RB1	63	0.0108586
PTEN	12	PTEN	90	0.0147367
ERBB2	13	ERBB2	139	0.0181494
HNRNPU	14	HNRNPU	141	0.0197006
GATA3	15	GATA3	96	0.0205538
AHCTF1	16	AHCTF1	148	0.0221826
MAP2K4	17	MAP2K4	61	0.0343597
EXO1	18	EXO1	141	0.0396339
GMDS	19	GMDS	35	0.0407973
CDKN1B	20	CDKN1B	36	0.0437447
CCNE1	21	CCNE1	45	0.0442876
NDUFB5	22	NDUFB5	49	0.0446754
PIK3R1	23	PIK3R1	15	0.0517335
CTSS	24	CTSS	140	0.0521213
CREBBP	25	CREBBP	14	0.0521989
BRCA1	26	BRCA1	39	0.0557667
PRKACB	27	PRKACB	15	0.0605755
CYP2E1	28	CYP2E1	20	0.0654619
ACAD8	29	ACAD8	23	0.0734507
RHOA	30	RHOA	12	0.0747693
HRAS	31	HRAS	15	0.076398
IGF1R	32	IGF1R	51	0.0770185
DTYMK	33	DTYMK	14	0.0851625
TFDP1	34	TFDP1	32	0.0884201
NT5E	35	NT5E	12	0.0935391
ERC1	36	ERC1	47	0.101606
TUBB3	37	TUBB3	31	0.101993
TARS2	38	TARS2	144	0.102691
CLNS1A	39	CLNS1A	81	0.105018
GRIN2A	40	GRIN2A	16	0.106337
U2AF2	41	U2AF2	32	0.113938
PLCE1	42	PLCE1	10	0.117738
GALNS	43	GALNS	30	0.118669
SDCCAG8	44	SDCCAG8	145	0.118669
POLB	45	POLB	107	0.120996
CCT2	46	CCT2	37	0.124098
GNB4	47	GNB4	47	0.127356
GRIN2B	48	GRIN2B	8	0.127356
PLCB2	49	PLCB2	3	0.132397
ALDOA	50	ALDOA	6	0.137206
NDUFS6	51	NDUFS6	30	0.140464
PRKCE	52	PRKCE	4	0.142636
LCT	53	LCT	12	0.143411
NET1	54	NET1	46	0.146048
EXT1	55	EXT1	6	0.147832
MAPK8	56	MAPK8	2	0.14884
AKR1B1	57	AKR1B1	3	0.14884
AGMAT	58	AGMAT	14	0.158458
GNAS	59	GNAS	11	0.160009
PCCA	60	PCCA	35	0.160009
CASP3	61	CASP3	20	0.162802
ARHGEF7	62	ARHGEF7	33	0.171644
MLF1IP	63	MLF1IP	19	0.172574
ADSS	64	ADSS	141	0.174281
RGS7	65	RGS7	146	0.174281
CDKN2A	66	CDKN2A	47	0.175754
BRCA2	67	BRCA2	15	0.177461
RBM17	68	RBM17	46	0.181106
WNT5B	69	WNT5B	41	0.18607
FRS2	70	FRS2	37	0.18607
TRAF2	71	TRAF2	12	0.188164
IL15RA	72	IL15RA	46	0.189793
DNAJC3	73	DNAJC3	27	0.197161
RIPK1	74	RIPK1	24	0.197161
VDAC3	75	VDAC3	107	0.197161
OR2W3	76	OR2W3	140	0.200186
ACTN2	77	ACTN2	7	0.200186
CDH15	78	CDH15	30	0.213294
NUP98	79	NUP98	11	0.221283
RAD52	80	RAD52	43	0.228031
CDC16	81	CDC16	33	0.228031
DAK	82	DAK	3	0.236485
CAPN1	83	CAPN1	24	0.236485
GAS6	84	GAS6	36	0.236485
FNTA	85	FNTA	106	0.24331
ADCY3	86	ADCY3	4	0.246878
NFATC1	87	NFATC1	31	0.246878
TCAP	88	TCAP	119	0.246878
CDCA5	89	CDCA5	18	0.246878
PLCB1	90	PLCB1	6	0.246878
SDHD	91	SDHD	19	0.24905
UQCRC1	92	UQCRC1	7	0.253161
RYR3	93	RYR3	15	0.253161
POLG	94	POLG	6	0.264717
RPL27	95	RPL27	20	0.264717
B3GALT5	96	B3GALT5	2	0.264717
MCM10	97	MCM10	4	0.264717
NF1	98	NF1	27	0.27387
KIF4A	99	KIF4A	13	0.278368
GALNT11	100	GALNT11	5	0.283565
TUBB2A	101	TUBB2A	20	0.283565
TXNL4A	102	TXNL4A	28	0.288063
CENPE	103	CENPE	6	0.288063
UBE2J1	104	UBE2J1	17	0.292252
RAF1	105	RAF1	4	0.292252
NT5C1B	106	NT5C1B	6	0.292252
SCLY	107	SCLY	12	0.307609
CASC5	108	CASC5	10	0.307609
FGFR2	109	FGFR2	11	0.312418
CCR10	110	CCR10	20	0.312418
PFKP	111	PFKP	5	0.312418
TERT	112	TERT	37	0.312418
PDGFRB	113	PDGFRB	7	0.3187
POLE	114	POLE	17	0.3187
ORAOV1	115	ORAOV1	153	0.3187

## Sheet: HNSC
Table S2 The results of HNSC
	rank	gene	mut	p-value
TP53	1	TP53	172	0
PIK3CA	2	PIK3CA	100	8.09e-05
NDUFB5	3	NDUFB5	56	0.00103097
CDKN2A	4	CDKN2A	134	0.00181936
EGFR	5	EGFR	40	0.00311312
FADD	6	FADD	81	0.00386108
SDHA	7	SDHA	30	0.00505377
EP300	8	EP300	22	0.00673162
PLCB1	9	PLCB1	11	0.00828819
HRAS	10	HRAS	12	0.0109161
CNDP1	11	CNDP1	19	0.0114013
CREBBP	12	CREBBP	15	0.0130994
DGKZ	13	DGKZ	11	0.0147368
IDUA	14	IDUA	11	0.0167583
GNB4	15	GNB4	56	0.0170615
ALDH1B1	16	ALDH1B1	13	0.017385
HSP90AA1	17	HSP90AA1	11	0.0175063
E2F1	18	E2F1	12	0.0209428
GALNT8	19	GALNT8	14	0.0210237
CYP3A5	20	CYP3A5	19	0.0215695
NOTCH1	21	NOTCH1	51	0.0221962
AMPD1	22	AMPD1	10	0.0226207
HNRNPA3	23	HNRNPA3	16	0.0228026
F2	24	F2	9	0.0239145
HMGCS1	25	HMGCS1	17	0.0281394
CASP8	26	CASP8	22	0.0282405
OR2AE1	27	OR2AE1	18	0.0300598
NFATC1	28	NFATC1	23	0.0305248
OR2S2	29	OR2S2	18	0.0328899
UGT2B4	30	UGT2B4	9	0.0329506
NOS3	31	NOS3	7	0.0334358
LAMP3	32	LAMP3	58	0.0337794
NFE2L2	33	NFE2L2	32	0.0338401
RPL37	34	RPL37	16	0.0343859
RAC1	35	RAC1	8	0.0363669
WBSCR17	36	WBSCR17	7	0.0366904
TAF6	37	TAF6	20	0.0370543
AKT1	38	AKT1	10	0.0377011
GHR	39	GHR	19	0.0390151
GRIN2A	40	GRIN2A	13	0.0407132
OGDH	41	OGDH	4	0.0421485
HLA-A	42	HLA-A	10	0.0428964
CUL1	43	CUL1	10	0.0433412
CYP4A11	44	CYP4A11	9	0.043705
SI	45	SI	9	0.0452818
NRAS	46	NRAS	10	0.0472629
XYLT1	47	XYLT1	6	0.0496483
TXNL4A	48	TXNL4A	17	0.0499717
C6	49	C6	26	0.0507601
FGFR1	50	FGFR1	31	0.0527007
ADCY8	51	ADCY8	12	0.0532465
POLR2B	52	POLR2B	4	0.0536104
FBXW7	53	FBXW7	12	0.0536508
CALM1	54	CALM1	7	0.0543179
TLN1	55	TLN1	20	0.0566831
SMURF1	56	SMURF1	19	0.0569661
PLCG1	57	PLCG1	5	0.0592706
ITPKB	58	ITPKB	3	0.0629902
POLR2A	59	POLR2A	3	0.0633743
DLAT	60	DLAT	7	0.0640616
MDM2	61	MDM2	16	0.06485
PRKACA	62	PRKACA	4	0.0649713
PIK3R1	63	PIK3R1	4	0.067296
EGF	64	EGF	4	0.0681855
PFAS	65	PFAS	6	0.0683472
GCLC	66	GCLC	10	0.0691356
UGT2B11	67	UGT2B11	6	0.0691356
PLD1	68	PLD1	7	0.0704496
DDC	69	DDC	7	0.0708135
RPL10	70	RPL10	12	0.0724913
AVPR2	71	AVPR2	10	0.0735021
GALNT12	72	GALNT12	3	0.0736234
GALR1	73	GALR1	19	0.0741085
ALOX12B	74	ALOX12B	4	0.0744522
AHCYL2	75	AHCYL2	4	0.0754427
PARD3	76	PARD3	9	0.0770195
SMAD4	77	SMAD4	20	0.0783941
PDE1C	78	PDE1C	8	0.0794453
ITGB1	79	ITGB1	7	0.079607
NUP98	80	NUP98	7	0.0820126
ADCY3	81	ADCY3	5	0.0831447
HNRNPC	82	HNRNPC	7	0.083367
ADCY2	83	ADCY2	11	0.0852875
PIGK	84	PIGK	3	0.0856311
CYLD	85	CYLD	10	0.0860758
TCIRG1	86	TCIRG1	6	0.0862174
MAN1C1	87	MAN1C1	3	0.0884006
PRPS1L1	88	PRPS1L1	4	0.0941821
GRM1	89	GRM1	15	0.0965473
MAPK1	90	MAPK1	4	0.0972548
CCT2	91	CCT2	15	0.0998019
TUBA3C	92	TUBA3C	11	0.100691
PC	93	PC	7	0.10621
DRD5	94	DRD5	9	0.108232
TGFBR2	95	TGFBR2	15	0.109485
TPH2	96	TPH2	8	0.110011
ADSSL1	97	ADSSL1	10	0.11088
GNAS	98	GNAS	5	0.111891
TPR	99	TPR	6	0.112133
JMJD7-PLA2G4B	100	JMJD7-PLA2G4B	3	0.113225
CTNNA2	101	CTNNA2	17	0.115327
CNGB1	102	CNGB1	8	0.115549
SHMT2	103	SHMT2	2	0.116156
ADCY1	104	ADCY1	10	0.117268
CSNK2A1	105	CSNK2A1	6	0.117268
GALNT2	106	GALNT2	3	0.119774
NMNAT1	107	NMNAT1	4	0.120886
FYN	108	FYN	5	0.121169
RANBP2	109	RANBP2	6	0.124181
PAPOLA	110	PAPOLA	8	0.124565
POLR2L	111	POLR2L	3	0.12598
DNMT3B	112	DNMT3B	4	0.126203
HCRTR2	113	HCRTR2	15	0.126203
NFIB	114	NFIB	14	0.129377
PRKCG	115	PRKCG	7	0.130185
ACTL6A	116	ACTL6A	57	0.131115
RASA1	117	RASA1	10	0.132854
SOS2	118	SOS2	4	0.134188
ITGA8	119	ITGA8	10	0.135037
GABRB3	120	GABRB3	12	0.139221
PIK3CG	121	PIK3CG	8	0.139464
ABCD1	122	ABCD1	12	0.141162
NCBP1	123	NCBP1	4	0.141607
HNRNPU	124	HNRNPU	5	0.142577
PPP2R1B	125	PPP2R1B	10	0.142719
RHOA	126	RHOA	4	0.144518
NUP93	127	NUP93	6	0.146681
HNRNPL	128	HNRNPL	6	0.14846
OR5AU1	129	OR5AU1	7	0.149895
SOS1	130	SOS1	4	0.150885
CREB3	131	CREB3	19	0.1523
SSR4	132	SSR4	11	0.1523
BRCA1	133	BRCA1	8	0.153635
ADCY4	134	ADCY4	9	0.155131
BUD31	135	BUD31	18	0.155414
PLG	136	PLG	7	0.155919
PRPF6	137	PRPF6	6	0.157779
IKBKG	138	IKBKG	10	0.158042
GTF2E1	139	GTF2E1	5	0.160811
CTSG	140	CTSG	6	0.16166
HADHA	141	HADHA	3	0.16166
PARD6G	142	PARD6G	19	0.163965
CEP72	143	CEP72	26	0.164227
HSD17B4	144	HSD17B4	3	0.165501
CNGA4	145	CNGA4	4	0.165824
TERT	146	TERT	26	0.167725
EPHX2	147	EPHX2	4	0.167967
FBXO4	148	FBXO4	17	0.169079
PLCB3	149	PLCB3	4	0.169766
SMC1A	150	SMC1A	3	0.171384
CYP2C8	151	CYP2C8	3	0.17201
ATP6V1H	152	ATP6V1H	2	0.174011
G6PD	153	G6PD	13	0.174011
L1CAM	154	L1CAM	12	0.176094
NOTCH2	155	NOTCH2	17	0.176963
HK2	156	HK2	5	0.17856
DOCK2	157	DOCK2	5	0.178782
HLA-B	158	HLA-B	6	0.178782
ATM	159	ATM	8	0.179106
GNB2	160	GNB2	17	0.179106
CKAP5	161	CKAP5	9	0.181552
RUNX2	162	RUNX2	3	0.182482
AOX1	163	AOX1	4	0.183634
ENPP1	164	ENPP1	4	0.184665
GAA	165	GAA	3	0.185473
ACADS	166	ACADS	2	0.186221
AGTR1	167	AGTR1	6	0.186221
GBE1	168	GBE1	10	0.187273
MCCC1	169	MCCC1	57	0.187273
OCRL	170	OCRL	3	0.188263
BST1	171	BST1	5	0.189031
CD72	172	CD72	20	0.193155
PRKCI	173	PRKCI	2	0.193539
HMGCR	174	HMGCR	2	0.194449
PIK3R5	175	PIK3R5	6	0.195237
PTDSS2	176	PTDSS2	5	0.195237
LPCAT2	177	LPCAT2	4	0.196026
MAN1A2	178	MAN1A2	9	0.196026
IDH3G	179	IDH3G	10	0.197744
HTR1A	180	HTR1A	7	0.198169
POM121	181	POM121	3	0.198169
SMARCA4	182	SMARCA4	12	0.20015
PRSS1	183	PRSS1	9	0.20203
CDC40	184	CDC40	4	0.207447
PLCD1	185	PLCD1	2	0.209347
SUCLA2	186	SUCLA2	4	0.209347
CHPF2	187	CHPF2	7	0.210439
ST8SIA1	188	ST8SIA1	2	0.210439
PLCG2	189	PLCG2	2	0.211227
ACSL1	190	ACSL1	2	0.211733
GRM3	191	GRM3	12	0.212198
NSD1	192	NSD1	27	0.213047
LILRB1	193	LILRB1	12	0.214866
CTDP1	194	CTDP1	18	0.216362
DGKH	195	DGKH	6	0.216362
EPO	196	EPO	18	0.217939
ASNS	197	ASNS	4	0.218929
CLCA1	198	CLCA1	4	0.220021
POLE	199	POLE	7	0.220607
ERBB4	200	ERBB4	12	0.221578
GMPS	201	GMPS	4	0.221578
ACTB	202	ACTB	2	0.222123
EXTL1	203	EXTL1	2	0.222609
AVPR1A	204	AVPR1A	5	0.224387
DHX9	205	DHX9	5	0.225014
ARHGEF12	206	ARHGEF12	7	0.227743
PTK2	207	PTK2	4	0.227743
SMPD2	208	SMPD2	3	0.227743
BRCA2	209	BRCA2	12	0.228714
GOT2	210	GOT2	2	0.228714
OR4F15	211	OR4F15	3	0.228714
ST8SIA5	212	ST8SIA5	4	0.232251
TUBA4A	213	TUBA4A	5	0.232999
SIT1	214	SIT1	20	0.233545
FGF10	215	FGF10	18	0.234798
FCGR1A	216	FCGR1A	6	0.23686
TGIF1	217	TGIF1	17	0.23686
UQCRFS1	218	UQCRFS1	3	0.23686
SF3B3	219	SF3B3	5	0.237325
MAP2K1	220	MAP2K1	3	0.23775
INPP1	221	INPP1	2	0.23967
HSPA1L	222	HSPA1L	3	0.241449
ATP6AP1	223	ATP6AP1	10	0.243107
SUPT16H	224	SUPT16H	11	0.243107
CDH1	225	CDH1	3	0.244886
ARRB2	226	ARRB2	3	0.24529
CHMP4B	227	CHMP4B	12	0.246381
CUL3	228	CUL3	16	0.246381
BCAS2	229	BCAS2	9	0.249353
FAT1	230	FAT1	21	0.252001
PIAS3	231	PIAS3	9	0.252426
CLTCL1	232	CLTCL1	5	0.254144
GRM7	233	GRM7	6	0.25467
KEAP1	234	KEAP1	12	0.255559
DCP1B	235	DCP1B	15	0.256449
IDI1	236	IDI1	1	0.256934
ALDOB	237	ALDOB	3	0.259056
ROCK1	238	ROCK1	7	0.259056
P2RY10	239	P2RY10	5	0.259501
WHSC2	240	WHSC2	4	0.261705
NUP214	241	NUP214	6	0.26219
ARPC1B	242	ARPC1B	19	0.26318
GRIN2B	243	GRIN2B	5	0.26318
DRD2	244	DRD2	7	0.26413
HGF	245	HGF	8	0.26413
CAMK2D	246	CAMK2D	1	0.265121
FN1	247	FN1	6	0.265121
HSP90AB1	248	HSP90AB1	4	0.266981
ARHGAP4	249	ARHGAP4	14	0.268456
SEL1L	250	SEL1L	8	0.268942
WHSC1L1	251	WHSC1L1	32	0.271691
SRRM1	252	SRRM1	2	0.2726
KALRN	253	KALRN	9	0.273025
NCBP2	254	NCBP2	3	0.273611
IQSEC3	255	IQSEC3	13	0.274319
PTEN	256	PTEN	7	0.274945
PRKG1	257	PRKG1	3	0.275431
WARS2	258	WARS2	14	0.275431
ARHGAP1	259	ARHGAP1	11	0.27628
MYL12B	260	MYL12B	17	0.279009
TSHB	261	TSHB	9	0.281111
ERCC3	262	ERCC3	3	0.282283
FOXO1	263	FOXO1	5	0.282283
AKAP9	264	AKAP9	17	0.282748
TUBB6	265	TUBB6	4	0.282748
PRKAA1	266	PRKAA1	17	0.283335
ASAP1	267	ASAP1	9	0.283901
FCGR3A	268	FCGR3A	4	0.283901
GNAL	269	GNAL	2	0.284507
CRYAB	270	CRYAB	7	0.286468
FBXL5	271	FBXL5	4	0.286468
TAF5	272	TAF5	4	0.286933
MAPK9	273	MAPK9	4	0.287459
MAP3K7	274	MAP3K7	6	0.287984
IL9R	275	IL9R	17	0.28853
ATR	276	ATR	15	0.289399
SLC6A3	277	SLC6A3	26	0.290208
LGMN	278	LGMN	9	0.290774
LRRC4C	279	LRRC4C	15	0.293604
CDH3	280	CDH3	6	0.297384
CAMK2B	281	CAMK2B	2	0.298638
HTR1B	282	HTR1B	4	0.299284
IKBKB	283	IKBKB	4	0.299284
SEC24A	284	SEC24A	5	0.299284
H2AFB1	285	H2AFB1	10	0.300053
HTR2A	286	HTR2A	6	0.300053
RPL36	287	RPL36	2	0.300053
GTF2A1	288	GTF2A1	2	0.301427
HTR1F	289	HTR1F	4	0.302519
PROS1	290	PROS1	5	0.302519
SLIT2	291	SLIT2	9	0.302519
SSTR4	292	SSTR4	5	0.305167
UBE2J1	293	UBE2J1	3	0.305895
AP1B1	294	AP1B1	4	0.309513
ERCC2	295	ERCC2	2	0.31018
CD2	296	CD2	8	0.310746
AP4M1	297	AP4M1	18	0.313536
CD28	298	CD28	2	0.32051
IGF1R	299	IGF1R	7	0.32051
ACTN1	300	ACTN1	4	0.322229
C8B	301	C8B	5	0.322229
ITCH	302	ITCH	4	0.323078
SNRPA	303	SNRPA	2	0.323078
MAPK14	304	MAPK14	1	0.324776
XRCC5	305	XRCC5	6	0.326615
BDKRB2	306	BDKRB2	6	0.327505
SNRPB	307	SNRPB	1	0.327505
CCAR1	308	CCAR1	3	0.329486
GRM8	309	GRM8	9	0.330355
HMGCS2	310	HMGCS2	11	0.330355
U2AF1	311	U2AF1	3	0.330982
NOS2	312	NOS2	3	0.331891
PPP2R5C	313	PPP2R5C	10	0.331891
HSPA8	314	HSPA8	3	0.332801
COL1A2	315	COL1A2	5	0.334358
UBR5	316	UBR5	11	0.334358
NUP62	317	NUP62	3	0.337026
XPO1	318	XPO1	3	0.337026
MOGS	319	MOGS	5	0.337875
MAP3K4	320	MAP3K4	2	0.338785
POLR3B	321	POLR3B	5	0.338785
ADCY7	322	ADCY7	3	0.340644
MYH4	323	MYH4	5	0.340644
MCM7	324	MCM7	21	0.341493
RANGAP1	325	RANGAP1	2	0.342241
SSRP1	326	SSRP1	3	0.342241
PDGFRB	327	PDGFRB	6	0.344384
XRN2	328	XRN2	5	0.344384
MYH9	329	MYH9	8	0.345213
PRKACB	330	PRKACB	2	0.348144
HLA-C	331	HLA-C	3	0.349236
PRKCB	332	PRKCB	4	0.351298
EIF3B	333	EIF3B	4	0.352329
RET	334	RET	7	0.353582
TCERG1	335	TCERG1	6	0.353582
DNAJA2	336	DNAJA2	4	0.354371
C3	337	C3	3	0.358697
ADRBK2	338	ADRBK2	3	0.35995
AP4B1	339	AP4B1	11	0.35995
ATP2B3	340	ATP2B3	18	0.35995
PHKA2	341	PHKA2	8	0.360981
TUSC3	342	TUSC3	5	0.361911
NPR2	343	NPR2	23	0.363204
NUP153	344	NUP153	1	0.365388
WARS	345	WARS	9	0.365388
ABCG8	346	ABCG8	8	0.368723
ACIN1	347	ACIN1	8	0.371129
DDB1	348	DDB1	6	0.371129
FLNA	349	FLNA	12	0.371129
PIK3R2	350	PIK3R2	3	0.374262
TJP1	351	TJP1	5	0.374262
RB1	352	RB1	9	0.375374
DHX15	353	DHX15	4	0.378042
LIFR	354	LIFR	10	0.379235
JAKMIP1	355	JAKMIP1	11	0.384895
SNRPD2	356	SNRPD2	2	0.38817
FLT1	357	FLT1	7	0.390434
GRM5	358	GRM5	5	0.390434
PRLHR	359	PRLHR	2	0.391546
ACTG1	360	ACTG1	2	0.39284
CCND1	361	CCND1	1	0.39284
AP3D1	362	AP3D1	7	0.393952
GABRG1	363	GABRG1	3	0.395185
TAP2	364	TAP2	5	0.395185
PXMP4	365	PXMP4	12	0.39658
RAD52	366	RAD52	11	0.39658
RPS5	367	RPS5	3	0.39658
PCBP2	368	PCBP2	3	0.398015
UBE4B	369	UBE4B	3	0.398015
CD40	370	CD40	4	0.399187
MCHR2	371	MCHR2	6	0.399187
HMHA1	372	HMHA1	8	0.400501
ARHGAP20	373	ARHGAP20	9	0.401916
DHX8	374	DHX8	3	0.40319
EIF2B1	375	EIF2B1	3	0.404403
MYH11	376	MYH11	9	0.404403
NUP107	377	NUP107	2	0.405697
RXRG	378	RXRG	6	0.408325
GRID2	379	GRID2	10	0.409699
ACSL4	380	ACSL4	6	0.412388
CPSF7	381	CPSF7	3	0.412388
NR3C1	382	NR3C1	4	0.412388
RBM8A	383	RBM8A	6	0.412388
CD80	384	CD80	4	0.413783
CTSS	385	CTSS	3	0.413783
EPHA7	386	EPHA7	13	0.415218
CTNNA1	387	CTNNA1	4	0.416411
MC5R	388	MC5R	6	0.416411
MAP3K1	389	MAP3K1	3	0.417704
MBTPS1	390	MBTPS1	5	0.417704
ACOX3	391	ACOX3	4	0.418917
LEPR	392	LEPR	8	0.418917
RPS15	393	RPS15	3	0.418917
ITGA4	394	ITGA4	4	0.420272
SSTR1	395	SSTR1	4	0.423183
MAPK10	396	MAPK10	3	0.424699
HTR6	397	HTR6	2	0.425952
MAPK13	398	MAPK13	3	0.425952
CACNA1C	399	CACNA1C	10	0.427286
ACTC1	400	ACTC1	7	0.42858
RBPJ	401	RBPJ	5	0.432805
ERN1	402	ERN1	4	0.435797
PIK3R3	403	PIK3R3	2	0.438546
MEF2C	404	MEF2C	10	0.440264
FGFR3	405	FGFR3	10	0.442084
IARS	406	IARS	7	0.442084
CDH19	407	CDH19	13	0.443741
IL10RA	408	IL10RA	4	0.443741
AMN	409	AMN	11	0.445419
CTNNA3	410	CTNNA3	7	0.445419
POLD3	411	POLD3	3	0.445419
PREX1	412	PREX1	3	0.448431
RHOBTB1	413	RHOBTB1	5	0.448431
ERBB2	414	ERBB2	12	0.449664
PLCB4	415	PLCB4	7	0.449664
PSMD13	416	PSMD13	3	0.449664
GNB1	417	GNB1	2	0.451787
HNRNPA1	418	HNRNPA1	1	0.451787
RNPS1	419	RNPS1	1	0.451787
RPL4	420	RPL4	1	0.451787
WFS1	421	WFS1	5	0.451787
GUCY2D	422	GUCY2D	3	0.453526
HIST1H2BK	423	HIST1H2BK	5	0.453526
C5	424	C5	2	0.457265
CETN2	425	CETN2	9	0.459267
SEC31B	426	SEC31B	4	0.459267
SEC61A2	427	SEC61A2	2	0.459267
ACTN4	428	ACTN4	3	0.460904
LONP2	429	LONP2	7	0.460904
CALML5	430	CALML5	1	0.462723
HTR7	431	HTR7	3	0.462723
CD2BP2	432	CD2BP2	3	0.466423
GSPT2	433	GSPT2	4	0.466423
SEC61A1	434	SEC61A1	3	0.466423
MYH2	435	MYH2	3	0.470688
MYO5A	436	MYO5A	8	0.472831
BAX	437	BAX	1	0.474933
DAD1	438	DAD1	4	0.474933
EIF4B	439	EIF4B	3	0.474933
ELMO1	440	ELMO1	9	0.474933
GPR65	441	GPR65	6	0.474933
TLR4	442	TLR4	6	0.476773
CCNA1	443	CCNA1	7	0.47928
HSPA6	444	HSPA6	2	0.47928
MYH6	445	MYH6	6	0.47928
NCOR1	446	NCOR1	10	0.480937
ACVR1B	447	ACVR1B	4	0.483181
EIF2S1	448	EIF2S1	1	0.483181
FURIN	449	FURIN	3	0.483181
AP1G1	450	AP1G1	5	0.48498
CDKN1B	451	CDKN1B	3	0.48498
CLCA4	452	CLCA4	3	0.48498
GTF2H1	453	GTF2H1	3	0.489225
LDLR	454	LDLR	4	0.489225
EPHB4	455	EPHB4	18	0.491287
PSMC6	456	PSMC6	3	0.491287
VAMP7	457	VAMP7	10	0.491287
ANAPC1	458	ANAPC1	3	0.493289
PPP1CC	459	PPP1CC	1	0.493289
TPO	460	TPO	6	0.493289
WNT5B	461	WNT5B	10	0.493289
RPL13A	462	RPL13A	1	0.495634
THOC2	463	THOC2	5	0.495634
PRKX	464	PRKX	1	0.4981
SF3B1	465	SF3B1	3	0.4981
TFRC	466	TFRC	3	0.4981
COL11A1	467	COL11A1	4	0.500505
IL18	468	IL18	6	0.50283
PDC	469	PDC	1	0.50283
HTR4	470	HTR4	1	0.505195
PTH1R	471	PTH1R	4	0.505195
STX18	472	STX18	6	0.505195
CAMK2G	473	CAMK2G	1	0.507298
CNGA3	474	CNGA3	2	0.507298
GIMAP4	475	GIMAP4	7	0.507298
XAB2	476	XAB2	2	0.507298
MYO1F	477	MYO1F	4	0.50942
SEC24B	478	SEC24B	3	0.50942
STAT5B	479	STAT5B	4	0.512028
ABCC8	480	ABCC8	8	0.514252
LPAR4	481	LPAR4	6	0.514252
EXOC3	482	EXOC3	25	0.5169
PAK7	483	PAK7	5	0.5169
LAMA4	484	LAMA4	7	0.519386
OR5P2	485	OR5P2	2	0.519386
APOA1	486	APOA1	5	0.521711
ARID1A	487	ARID1A	10	0.521711
CTBP1	488	CTBP1	7	0.521711
MYH8	489	MYH8	3	0.521711
SEC31A	490	SEC31A	3	0.521711
STX4	491	STX4	4	0.521711
TRAM1	492	TRAM1	2	0.521711
PILRA	493	PILRA	17	0.523874
POLR2G	494	POLR2G	2	0.523874
DNM3	495	DNM3	5	0.52632
RAPGEF1	496	RAPGEF1	2	0.52632
NCK2	497	NCK2	3	0.528625
RBX1	498	RBX1	2	0.528625
CACNA1E	499	CACNA1E	3	0.530747
CCL28	500	CCL28	17	0.530747
EIF3A	501	EIF3A	2	0.530747
EIF5B	502	EIF5B	3	0.530747
FAR1	503	FAR1	6	0.530747
TRA2B	504	TRA2B	3	0.530747
KCNMB2	505	KCNMB2	57	0.533173
TACR3	506	TACR3	4	0.533173
DOK1	507	DOK1	3	0.535558
PLK1	508	PLK1	2	0.535558
SHC4	509	SHC4	3	0.535558
GRIN3A	510	GRIN3A	8	0.538085
CNTNAP2	511	CNTNAP2	9	0.540491
ITGA10	512	ITGA10	11	0.540491
NUDT21	513	NUDT21	3	0.540491
OR4F17	514	OR4F17	3	0.540491
ITGA2B	515	ITGA2B	3	0.545585
PEX1	516	PEX1	8	0.548193
DPM1	517	DPM1	2	0.550619
MAPK8	518	MAPK8	2	0.550619
MNAT1	519	MNAT1	1	0.550619
PCSK5	520	PCSK5	5	0.550619
PSMC1	521	PSMC1	7	0.550619
HERPUD1	522	HERPUD1	3	0.555389
PIK3CB	523	PIK3CB	4	0.555389
UBE4A	524	UBE4A	4	0.555389
POLD1	525	POLD1	3	0.558038
ATF6	526	ATF6	2	0.560767
ITGA1	527	ITGA1	3	0.563172
PHF5A	528	PHF5A	1	0.563172
PTGFR	529	PTGFR	2	0.563172
HAO2	530	HAO2	8	0.565638
ITGAL	531	ITGAL	2	0.565638
ACSL3	532	ACSL3	5	0.568226
DAB2	533	DAB2	4	0.568226
FARSB	534	FARSB	8	0.568226
BRF1	535	BRF1	11	0.570733
HIST1H2BD	536	HIST1H2BD	4	0.570733
PAK6	537	PAK6	2	0.570733
HTR5A	538	HTR5A	3	0.5733
RBM25	539	RBM25	2	0.5733
BMP5	540	BMP5	12	0.57617
NUP54	541	NUP54	2	0.57617
DYNC1H1	542	DYNC1H1	8	0.579183
HTR2C	543	HTR2C	1	0.579183
LRP6	544	LRP6	5	0.579183
ATP1A1	545	ATP1A1	10	0.582478
PARK2	546	PARK2	1	0.582478
NFATC4	547	NFATC4	7	0.585267
ARHGAP30	548	ARHGAP30	5	0.58834
ERCC5	549	ERCC5	6	0.58834
IL6ST	550	IL6ST	2	0.58834
KIF2B	551	KIF2B	6	0.58834
SEMA5A	552	SEMA5A	15	0.58834
TBXAS1	553	TBXAS1	5	0.58834
UBE3B	554	UBE3B	4	0.58834
EIF2AK1	555	EIF2AK1	5	0.590806
PEX16	556	PEX16	10	0.590806
HIST2H2BE	557	HIST2H2BE	9	0.593778
RAC3	558	RAC3	2	0.593778
TUBA1A	559	TUBA1A	1	0.593778
UBA52	560	UBA52	1	0.593778
WNT3	561	WNT3	4	0.593778
ADCY9	562	ADCY9	3	0.596709
RHOBTB2	563	RHOBTB2	2	0.596709
SBNO1	564	SBNO1	5	0.596709
EPHA3	565	EPHA3	12	0.59958
PCDH8	566	PCDH8	7	0.59958
PDE3A	567	PDE3A	8	0.59958
TACR2	568	TACR2	2	0.59958
MAPK8IP1	569	MAPK8IP1	10	0.602571
NFKB1	570	NFKB1	2	0.602571
GABRA2	571	GABRA2	6	0.605442
SLC7A7	572	SLC7A7	5	0.605442
CA9	573	CA9	19	0.608494
HIST1H4E	574	HIST1H4E	5	0.608494
HIST2H2BF	575	HIST2H2BF	9	0.608494
PRPF4	576	PRPF4	1	0.608494
TTF1	577	TTF1	3	0.608494
DIS3	578	DIS3	4	0.611789
NLGN1	579	NLGN1	9	0.611789
ACTN2	580	ACTN2	3	0.615105
PDE6B	581	PDE6B	7	0.615105
SF3B5	582	SF3B5	1	0.615105
CACNA1D	583	CACNA1D	13	0.618642
GLRA2	584	GLRA2	4	0.618642
GNG8	585	GNG8	1	0.618642
MYH16	586	MYH16	18	0.618642
NCKAP1L	587	NCKAP1L	4	0.618642
P2RX1	588	P2RX1	3	0.618642
ADCY6	589	ADCY6	2	0.621796
CDC5L	590	CDC5L	3	0.621796
SIL1	591	SIL1	3	0.621796
C8A	592	C8A	5	0.625131
CHRND	593	CHRND	6	0.625131
EIF5	594	EIF5	7	0.625131
HLA-DRA	595	HLA-DRA	1	0.625131
ZW10	596	ZW10	10	0.625131
GNPTAB	597	GNPTAB	7	0.628649
IL16	598	IL16	9	0.628649
RAD50	599	RAD50	3	0.628649
EXOC4	600	EXOC4	10	0.632065
GRB7	601	GRB7	7	0.632065
GRIN1	602	GRIN1	1	0.632065
PSMA1	603	PSMA1	6	0.632065
SLC2A2	604	SLC2A2	4	0.632065
TAF4B	605	TAF4B	2	0.632065
TUBA1B	606	TUBA1B	3	0.632065
IDH1	607	IDH1	5	0.635118
CBL	608	CBL	2	0.638534
CDC25B	609	CDC25B	3	0.638534
CDK5	610	CDK5	5	0.638534
HERC2	611	HERC2	4	0.638534
KIT	612	KIT	4	0.638534
UBXN6	613	UBXN6	2	0.638534
GABRB2	614	GABRB2	6	0.642132
GSN	615	GSN	5	0.642132
ITGB3	616	ITGB3	3	0.642132
TRAF3	617	TRAF3	13	0.645124
DCTN1	618	DCTN1	4	0.648945
STX1A	619	STX1A	3	0.648945
CPS1	620	CPS1	10	0.652503
NCK1	621	NCK1	4	0.652503
PIAS4	622	PIAS4	2	0.652503
RQCD1	623	RQCD1	4	0.652503
TMLHE	624	TMLHE	12	0.652503
AKT2	625	AKT2	4	0.656081
COL4A4	626	COL4A4	6	0.656081
HIST1H2AB	627	HIST1H2AB	3	0.656081
IL2RA	628	IL2RA	2	0.656081
KIF13A	629	KIF13A	1	0.656081
THBS2	630	THBS2	4	0.656081
VBP1	631	VBP1	11	0.656081
CARD6	632	CARD6	20	0.659962
DCC	633	DCC	6	0.659962
HLTF	634	HLTF	4	0.659962
PCDHA12	635	PCDHA12	6	0.659962
SKP1	636	SKP1	1	0.659962
ABCD2	637	ABCD2	5	0.663156
ATP2A2	638	ATP2A2	5	0.663156
ATXN3	639	ATXN3	9	0.663156
CHRM3	640	CHRM3	4	0.666815
CLDN18	641	CLDN18	3	0.666815
EIF3D	642	EIF3D	2	0.670353
F8	643	F8	11	0.670353
HIPK3	644	HIPK3	4	0.670353
LYN	645	LYN	3	0.670353
PLA2G4A	646	PLA2G4A	2	0.670353
TTC37	647	TTC37	4	0.670353
APBB1IP	648	APBB1IP	4	0.674476
MC3R	649	MC3R	1	0.674476
SELP	650	SELP	7	0.674476
LSM7	651	LSM7	2	0.678075
NBN	652	NBN	3	0.678075
PIK3CD	653	PIK3CD	2	0.678075
IRAK1	654	IRAK1	12	0.682158
NTSR2	655	NTSR2	4	0.682158
SETD2	656	SETD2	7	0.682158
CARS	657	CARS	4	0.685716
COL1A1	658	COL1A1	6	0.685716
HDAC2	659	HDAC2	3	0.685716
HLA-DQA2	660	HLA-DQA2	2	0.685716
LPAR1	661	LPAR1	2	0.685716
MCF2	662	MCF2	8	0.685716
SPEN	663	SPEN	14	0.685716
CASP10	664	CASP10	2	0.689476
EIF4EBP1	665	EIF4EBP1	1	0.689476
ITGA7	666	ITGA7	3	0.689476
PCOLCE	667	PCOLCE	15	0.689476
DVL3	668	DVL3	4	0.693357
GABRA1	669	GABRA1	7	0.693357
IL6R	670	IL6R	4	0.693357
MYH3	671	MYH3	3	0.693357
PIK3R4	672	PIK3R4	5	0.693357
RHOC	673	RHOC	5	0.693357
UBE3A	674	UBE3A	5	0.693357
WASL	675	WASL	1	0.693357
MAP2K3	676	MAP2K3	2	0.697077
RPL37A	677	RPL37A	5	0.697077
CNOT1	678	CNOT1	3	0.700837
GP5	679	GP5	3	0.700837
MLNR	680	MLNR	6	0.700837
RBM5	681	RBM5	3	0.700837
ARHGAP17	682	ARHGAP17	6	0.705406
CDK9	683	CDK9	2	0.705406
CLCA2	684	CLCA2	2	0.705406
NTSR1	685	NTSR1	2	0.705406
NUP37	686	NUP37	2	0.705406
PCSK2	687	PCSK2	4	0.705406
APAF1	688	APAF1	6	0.709812
HIST1H3G	689	HIST1H3G	3	0.709812
HTR1E	690	HTR1E	9	0.709812
PCDH11X	691	PCDH11X	15	0.709812
RRBP1	692	RRBP1	2	0.709812
HIST1H2AE	693	HIST1H2AE	2	0.714098
RASGRF1	694	RASGRF1	8	0.714098
UGT2A1	695	UGT2A1	5	0.714098
ACHE	696	ACHE	17	0.718424
CHN1	697	CHN1	4	0.718424
CNOT6L	698	CNOT6L	3	0.718424
JAG2	699	JAG2	11	0.718424
LIMK1	700	LIMK1	4	0.718424
LTB4R	701	LTB4R	7	0.718424
RIPK2	702	RIPK2	1	0.718424
SUPT5H	703	SUPT5H	3	0.718424
DVL1	704	DVL1	2	0.723397
HIST1H2BH	705	HIST1H2BH	3	0.723397
SNX20	706	SNX20	4	0.723397
CEP152	707	CEP152	4	0.727864
VCL	708	VCL	3	0.727864
ACVR1	709	ACVR1	4	0.732615
ARHGAP15	710	ARHGAP15	3	0.732615
ARHGEF6	711	ARHGEF6	3	0.732615
ITGAX	712	ITGAX	3	0.732615
MAP2K2	713	MAP2K2	3	0.732615
MED12	714	MED12	11	0.732615
NUMA1	715	NUMA1	4	0.732615
VAV1	716	VAV1	3	0.732615
WHSC1	717	WHSC1	11	0.732615
XRCC6	718	XRCC6	2	0.732615
LEP	719	LEP	1	0.737507
RBL1	720	RBL1	6	0.737507
VCAN	721	VCAN	3	0.737507
CCR1	722	CCR1	1	0.742035
CD40LG	723	CD40LG	2	0.742035
HSPA5	724	HSPA5	2	0.742035
NEDD1	725	NEDD1	5	0.742035
RPA4	726	RPA4	6	0.742035
SKP2	727	SKP2	2	0.742035
ERC1	728	ERC1	13	0.747514
H3F3C	729	H3F3C	2	0.747514
IL7R	730	IL7R	3	0.747514
PILRB	731	PILRB	17	0.747514
SH3KBP1	732	SH3KBP1	6	0.747514
CALR	733	CALR	1	0.752527
NRXN1	734	NRXN1	11	0.752527
PTGER2	735	PTGER2	4	0.752527
PTGER4	736	PTGER4	18	0.752527
SERPING1	737	SERPING1	3	0.752527
UBE2D3	738	UBE2D3	1	0.752527
LRP1B	739	LRP1B	9	0.758025
ANAPC4	740	ANAPC4	3	0.762998
ARHGAP9	741	ARHGAP9	3	0.762998
DNAJC8	742	DNAJC8	2	0.762998
FAT2	743	FAT2	1	0.762998
HK3	744	HK3	4	0.762998
KIR3DL2	745	KIR3DL2	4	0.762998
PSAP	746	PSAP	2	0.762998
UGT1A6	747	UGT1A6	4	0.762998
ABCB1	748	ABCB1	6	0.768719
CPT1A	749	CPT1A	6	0.768719
ERBB3	750	ERBB3	7	0.768719
MYC	751	MYC	3	0.768719
PDHA1	752	PDHA1	3	0.77446
TARS	753	TARS	3	0.77446
WNT10A	754	WNT10A	6	0.77446
GRK5	755	GRK5	5	0.779251
HNRNPUL1	756	HNRNPUL1	2	0.779251
PDE10A	757	PDE10A	13	0.779251
PRKCH	758	PRKCH	2	0.779251
SNRNP200	759	SNRNP200	1	0.779251
SNRPA1	760	SNRPA1	4	0.779251
TACR1	761	TACR1	2	0.779251
ACAP2	762	ACAP2	3	0.784123
ATP5J2	763	ATP5J2	18	0.784123
C5AR1	764	C5AR1	1	0.784123
HIST1H2AA	765	HIST1H2AA	3	0.784123
HIST1H3D	766	HIST1H3D	3	0.784123
MFN1	767	MFN1	62	0.784123
SNAI2	768	SNAI2	20	0.784123
ABCB4	769	ABCB4	7	0.789804
ATRIP	770	ATRIP	3	0.789804
EXOSC8	771	EXOSC8	3	0.789804
HIST1H2AK	772	HIST1H2AK	2	0.789804
HIST1H2BF	773	HIST1H2BF	2	0.789804
NHLRC1	774	NHLRC1	3	0.795302
POLR1A	775	POLR1A	3	0.795302
CD164	776	CD164	3	0.800902
GRIK3	777	GRIK3	5	0.800902
YARS2	778	YARS2	3	0.800902
ABCC11	779	ABCC11	7	0.806562
ATP1A2	780	ATP1A2	4	0.806562
HIST1H3I	781	HIST1H3I	5	0.806562
INADL	782	INADL	4	0.806562
NCAM2	783	NCAM2	7	0.806562
RBBP7	784	RBBP7	3	0.806562
CUL4B	785	CUL4B	4	0.812303
EEA1	786	EEA1	3	0.812303
GNPAT	787	GNPAT	2	0.812303
GRIN2C	788	GRIN2C	3	0.812303
SEPSECS	789	SEPSECS	3	0.812303
SSR2	790	SSR2	1	0.812303
TTN	791	TTN	8	0.812303
VARS	792	VARS	3	0.812303
CRY2	793	CRY2	10	0.818105
CTSF	794	CTSF	2	0.818105
EHD1	795	EHD1	4	0.818105
MME	796	MME	10	0.818105
SPN	797	SPN	2	0.818105
EIF2S2	798	EIF2S2	2	0.824007
GSTK1	799	GSTK1	2	0.824007
NCOA2	800	NCOA2	3	0.824007
TAF1L	801	TAF1L	4	0.824007
UNC5C	802	UNC5C	8	0.824007
CCL25	803	CCL25	2	0.829526
CNOT3	804	CNOT3	3	0.829526
CYP8B1	805	CYP8B1	3	0.829526
HLA-DMB	806	HLA-DMB	1	0.829526
POLR1B	807	POLR1B	1	0.829526
PSME3	808	PSME3	2	0.829526
RFC5	809	RFC5	3	0.829526
SLC4A4	810	SLC4A4	10	0.829526
TAAR2	811	TAAR2	2	0.829526
EFTUD2	812	EFTUD2	3	0.834641
PML	813	PML	2	0.834641
RPS13	814	RPS13	4	0.834641
SORBS1	815	SORBS1	2	0.834641
ACADM	816	ACADM	3	0.839876
AP1S3	817	AP1S3	5	0.839876
APEX1	818	APEX1	5	0.839876
C1S	819	C1S	3	0.839876
CD8A	820	CD8A	2	0.839876
MYL5	821	MYL5	7	0.839876
SCARB2	822	SCARB2	2	0.839876
SIAH1	823	SIAH1	6	0.839876
CASP3	824	CASP3	1	0.845496
CYP11B2	825	CYP11B2	3	0.845496
MAPK11	826	MAPK11	3	0.845496
NCAM1	827	NCAM1	5	0.845496
PIP5K1C	828	PIP5K1C	2	0.845496
PLXNB2	829	PLXNB2	6	0.845496
POLD2	830	POLD2	1	0.845496
ROBO2	831	ROBO2	11	0.845496
THBS1	832	THBS1	6	0.845496
UNC5D	833	UNC5D	11	0.845496
B2M	834	B2M	3	0.850247
BAG4	835	BAG4	3	0.850247
CLP1	836	CLP1	2	0.850247
GNB3	837	GNB3	3	0.850247
LSM4	838	LSM4	1	0.850247
PARS2	839	PARS2	3	0.850247
PDCD1	840	PDCD1	5	0.850247
PIK3C3	841	PIK3C3	3	0.850247
SEC22B	842	SEC22B	6	0.850247
ZMAT3	843	ZMAT3	58	0.850247
CHRNA2	844	CHRNA2	2	0.854613
CHRNB3	845	CHRNB3	4	0.854613
GAB3	846	GAB3	13	0.854613
LAPTM5	847	LAPTM5	1	0.854613
MGRN1	848	MGRN1	3	0.854613
PCSK1	849	PCSK1	2	0.854613
PXN	850	PXN	2	0.854613
REC8	851	REC8	5	0.854613
SLC11A2	852	SLC11A2	3	0.854613
USP11	853	USP11	2	0.854613
YARS	854	YARS	3	0.854613
ADAM17	855	ADAM17	4	0.859182
FZR1	856	FZR1	2	0.859182
NAA38	857	NAA38	1	0.859182
PLA2G4E	858	PLA2G4E	3	0.859182
RELA	859	RELA	1	0.859182
C7	860	C7	18	0.864296
CHRM4	861	CHRM4	8	0.864296
CLIP1	862	CLIP1	3	0.864296
DNAJC10	863	DNAJC10	3	0.864296
NFATC3	864	NFATC3	3	0.864296
SCNN1G	865	SCNN1G	3	0.864296
VTA1	866	VTA1	3	0.864296
BTK	867	BTK	5	0.869289
CSTF2	868	CSTF2	1	0.869289
GSK3A	869	GSK3A	1	0.869289
BLM	870	BLM	5	0.874363
COL6A2	871	COL6A2	5	0.874363
GBF1	872	GBF1	4	0.874363
GDF5	873	GDF5	2	0.874363
GRIN2D	874	GRIN2D	3	0.874363
HNRNPA1L2	875	HNRNPA1L2	5	0.874363
KIR3DL1	876	KIR3DL1	3	0.874363
LCK	877	LCK	3	0.874363
PNLIPRP1	878	PNLIPRP1	5	0.874363
STARD13	879	STARD13	5	0.874363
TRRAP	880	TRRAP	29	0.874363
YOD1	881	YOD1	1	0.874363
CECR1	882	CECR1	4	0.878992
CHRM5	883	CHRM5	3	0.878992
DKC1	884	DKC1	12	0.878992
HIST1H2BL	885	HIST1H2BL	1	0.878992
LIF	886	LIF	2	0.878992
PEX11A	887	PEX11A	7	0.878992
PRMT5	888	PRMT5	6	0.878992
TFDP1	889	TFDP1	2	0.878992
TIAM2	890	TIAM2	4	0.878992
ABCB6	891	ABCB6	9	0.883561
AP4E1	892	AP4E1	5	0.883561
ATP6V0A1	893	ATP6V0A1	1	0.883561
NGEF	894	NGEF	4	0.883561
SDHD	895	SDHD	6	0.883561
SIRT3	896	SIRT3	6	0.883561
TH	897	TH	4	0.883561
ADRA1A	898	ADRA1A	4	0.888352
AURKB	899	AURKB	3	0.888352
C1QC	900	C1QC	1	0.888352
CSNK1E	901	CSNK1E	3	0.888352
DDI2	902	DDI2	3	0.888352
HERC3	903	HERC3	4	0.888352
MCM2	904	MCM2	4	0.888352
PCDHA3	905	PCDHA3	8	0.888352
PCDHGB7	906	PCDHGB7	3	0.888352
POLR3GL	907	POLR3GL	7	0.888352
S1PR4	908	S1PR4	3	0.888352
SASH3	909	SASH3	2	0.888352
SEMA3C	910	SEMA3C	4	0.888352
SNRNP40	911	SNRNP40	1	0.888352
CDC34	912	CDC34	3	0.892779
ENTPD4	913	ENTPD4	4	0.892779
JAG1	914	JAG1	4	0.892779
JAK2	915	JAK2	2	0.892779
MAP3K5	916	MAP3K5	1	0.892779
RAD23B	917	RAD23B	1	0.892779
REST	918	REST	2	0.892779
RIMS1	919	RIMS1	8	0.892779
SEMA3A	920	SEMA3A	9	0.892779
SFRP4	921	SFRP4	8	0.892779
TAP1	922	TAP1	3	0.892779
ABCA10	923	ABCA10	4	0.89753
ARFGAP1	924	ARFGAP1	4	0.89753
GABRA5	925	GABRA5	7	0.89753
ITGA2	926	ITGA2	3	0.89753
NPLOC4	927	NPLOC4	3	0.89753
PCK2	928	PCK2	6	0.89753
CNOT10	929	CNOT10	2	0.901916
EDC4	930	EDC4	2	0.901916
EXOSC10	931	EXOSC10	2	0.901916
FGA	932	FGA	6	0.901916
FGD1	933	FGD1	7	0.901916
GRIA1	934	GRIA1	7	0.901916
IGF1	935	IGF1	2	0.901916
LILRB2	936	LILRB2	5	0.901916
PNPT1	937	PNPT1	2	0.901916
ROCK2	938	ROCK2	2	0.901916
SEC62	939	SEC62	1	0.901916
SNRNP27	940	SNRNP27	1	0.901916
ZNF423	941	ZNF423	10	0.901916
APC	942	APC	10	0.906384
CYSLTR1	943	CYSLTR1	1	0.906384
F9	944	F9	4	0.906384
GNAT3	945	GNAT3	4	0.906384
MARS2	946	MARS2	2	0.906384
TNFRSF10A	947	TNFRSF10A	1	0.906384
APITD1	948	APITD1	2	0.911236
COL5A2	949	COL5A2	4	0.911236
CREB3L1	950	CREB3L1	10	0.911236
EARS2	951	EARS2	2	0.911236
HACL1	952	HACL1	4	0.911236
INS	953	INS	2	0.911236
MMP1	954	MMP1	3	0.911236
NUP160	955	NUP160	2	0.911236
PDX1	956	PDX1	2	0.911236
RSL24D1	957	RSL24D1	1	0.911236
SERPINA1	958	SERPINA1	10	0.911236
ACTG2	959	ACTG2	3	0.915521
APP	960	APP	2	0.915521
ARHGAP5	961	ARHGAP5	3	0.915521
CBLB	962	CBLB	2	0.915521
CKAP4	963	CKAP4	1	0.915521
CYB5A	964	CYB5A	17	0.915521
DDX6	965	DDX6	2	0.915521
LAMP2	966	LAMP2	1	0.915521
NPY2R	967	NPY2R	3	0.915521
PDGFRA	968	PDGFRA	6	0.915521
PRKAR2B	969	PRKAR2B	2	0.915521
SELE	970	SELE	3	0.915521
TDP1	971	TDP1	8	0.915521
THOC1	972	THOC1	1	0.915521
TRIP6	973	TRIP6	16	0.915521
WDR77	974	WDR77	3	0.915521
CHN2	975	CHN2	5	0.919989
F2R	976	F2R	1	0.919989
GIMAP6	977	GIMAP6	9	0.919989
GLRA3	978	GLRA3	2	0.919989
GRIK5	979	GRIK5	3	0.919989
HIST1H2BM	980	HIST1H2BM	1	0.919989
PPARGC1A	981	PPARGC1A	3	0.919989
SIN3A	982	SIN3A	2	0.919989
CCNB1	983	CCNB1	2	0.92389
CCR6	984	CCR6	1	0.92389
EPB41L2	985	EPB41L2	4	0.92389
HYOU1	986	HYOU1	2	0.92389
PLEKHG5	987	PLEKHG5	2	0.92389
PLXNA1	988	PLXNA1	4	0.92389
PLXNA3	989	PLXNA3	12	0.92389
RFC3	990	RFC3	3	0.92389
SLCO1B3	991	SLCO1B3	5	0.92389
STX7	992	STX7	2	0.92389
APH1A	993	APH1A	2	0.928216
CCL20	994	CCL20	3	0.928216
CDK8	995	CDK8	4	0.928216
FGB	996	FGB	2	0.928216
H3F3B	997	H3F3B	1	0.928216
NOTCH3	998	NOTCH3	2	0.928216
NSFL1C	999	NSFL1C	2	0.928216
PEX14	1000	PEX14	4	0.928216
PPP2R1A	1001	PPP2R1A	1	0.928216
PTPN11	1002	PTPN11	1	0.928216
RENBP	1003	RENBP	13	0.928216
SLC4A2	1004	SLC4A2	8	0.928216
ELOVL5	1005	ELOVL5	11	0.932401
IFNGR1	1006	IFNGR1	4	0.932401
JAK1	1007	JAK1	5	0.932401
LATS1	1008	LATS1	4	0.932401
SCML4	1009	SCML4	3	0.932401
TAOK1	1010	TAOK1	2	0.932401
ZNF831	1011	ZNF831	3	0.932401
ARAP1	1012	ARAP1	2	0.936787
C3AR1	1013	C3AR1	2	0.936787
CNOT4	1014	CNOT4	2	0.936787
GAS6	1015	GAS6	1	0.936787
MAN1B1	1016	MAN1B1	3	0.936787
MUTYH	1017	MUTYH	2	0.936787
NKD2	1018	NKD2	24	0.936787
PRF1	1019	PRF1	3	0.936787
PTPRM	1020	PTPRM	5	0.936787
TFB2M	1021	TFB2M	1	0.936787
ASAP3	1022	ASAP3	3	0.940507
CELSR2	1023	CELSR2	1	0.940507
CEP135	1024	CEP135	3	0.940507
CSF1	1025	CSF1	1	0.940507
CYP2C9	1026	CYP2C9	4	0.940507
NID2	1027	NID2	8	0.940507
NLRP4	1028	NLRP4	8	0.940507
NSL1	1029	NSL1	2	0.940507
TAF1C	1030	TAF1C	2	0.940507
TRIM21	1031	TRIM21	2	0.940507
ALDH7A1	1032	ALDH7A1	2	0.944328
APOA5	1033	APOA5	7	0.944328
CD74	1034	CD74	2	0.944328
CFH	1035	CFH	9	0.944328
DNAJB2	1036	DNAJB2	4	0.944328
ERLEC1	1037	ERLEC1	1	0.944328
GNB5	1038	GNB5	2	0.944328
PLAA	1039	PLAA	3	0.944328
RAB5C	1040	RAB5C	1	0.944328
SLC16A1	1041	SLC16A1	8	0.944328
UGT2B28	1042	UGT2B28	3	0.944328
WNT9A	1043	WNT9A	3	0.944328
ZDHHC20	1044	ZDHHC20	3	0.944328
ABCD4	1045	ABCD4	3	0.947886
CD163	1046	CD163	11	0.947886
FOXO3	1047	FOXO3	5	0.947886
GDA	1048	GDA	4	0.947886
GIT2	1049	GIT2	2	0.947886
MTFMT	1050	MTFMT	3	0.947886
NRXN3	1051	NRXN3	11	0.947886
PRKCA	1052	PRKCA	2	0.947886
SEC23B	1053	SEC23B	3	0.947886
TAZ	1054	TAZ	12	0.947886
ADRB3	1055	ADRB3	2	0.951059
APOB	1056	APOB	1	0.951059
ARHGAP18	1057	ARHGAP18	2	0.951059
ATP5I	1058	ATP5I	7	0.951059
CAT	1059	CAT	3	0.951059
CAV1	1060	CAV1	1	0.951059
CD53	1061	CD53	1	0.951059
CYP11B1	1062	CYP11B1	3	0.951059
DICER1	1063	DICER1	12	0.951059
HEXA	1064	HEXA	2	0.951059
QARS	1065	QARS	2	0.951059
RPS6KA2	1066	RPS6KA2	4	0.951059
SAP18	1067	SAP18	2	0.951059
TRA2A	1068	TRA2A	2	0.951059
AARS2	1069	AARS2	2	0.954698
ABCC3	1070	ABCC3	2	0.954698
AP2A1	1071	AP2A1	2	0.954698
CDH15	1072	CDH15	2	0.954698
CPT1B	1073	CPT1B	3	0.954698
EIF4G1	1074	EIF4G1	2	0.954698
HK1	1075	HK1	3	0.954698
KIAA1462	1076	KIAA1462	4	0.954698
LILRB4	1077	LILRB4	5	0.954698
NDUFA9	1078	NDUFA9	9	0.954698
NEDD4	1079	NEDD4	5	0.954698
PMVK	1080	PMVK	3	0.954698
RPS6KB1	1081	RPS6KB1	2	0.954698
SPTAN1	1082	SPTAN1	2	0.954698
TPM2	1083	TPM2	19	0.954698
C9orf53	1084	C9orf53	70	0.95771

## Sheet: KIRC
Table S3 The results of KIRC
	rank	gene	mut	p-value
VHL	1	VHL	218	0.000106
PIK3CA	2	PIK3CA	12	0.000388665
PTEN	3	PTEN	18	0.000423998
TP53	4	TP53	9	0.000635997
ATM	5	ATM	12	0.000794997
PLA2G4E	6	PLA2G4E	8	0.00088333
EP300	7	EP300	6	0.00113066
NOS1	8	NOS1	8	0.00114833
EGFR	9	EGFR	7	0.00153699
SOS1	10	SOS1	6	0.00171366
CLTC	11	CLTC	7	0.00183733
MAP2K3	12	MAP2K3	8	0.00211999
CPS1	13	CPS1	6	0.00351565
XPO1	14	XPO1	6	0.00367465
ADCY8	15	ADCY8	6	0.00369232
CREBBP	16	CREBBP	4	0.00379832
SI	17	SI	6	0.00379832
ANPEP	18	ANPEP	6	0.00413398
PI4KA	19	PI4KA	8	0.00418698
POLR2B	20	POLR2B	4	0.00429298
POLR3B	21	POLR3B	5	0.00448732
PDGFRA	22	PDGFRA	6	0.00549431
PCK1	23	PCK1	5	0.00565331
HSP90AA1	24	HSP90AA1	4	0.00641297
POLR2A	25	POLR2A	5	0.00688997
RANBP2	26	RANBP2	8	0.00699597
PRKACB	27	PRKACB	4	0.0074023
DNMT1	28	DNMT1	5	0.00775564
PIGQ	29	PIGQ	4	0.00775564
MAP3K5	30	MAP3K5	5	0.00784397
PABPC1	31	PABPC1	19	0.0085153
HSPA8	32	HSPA8	5	0.00913363
STAT1	33	STAT1	4	0.00922196
NDUFS1	34	NDUFS1	4	0.00955763
AKT1	35	AKT1	2	0.0103703
AKT2	36	AKT2	3	0.011024
ACSL6	37	ACSL6	4	0.0110593
CYP4A11	38	CYP4A11	4	0.01113
PLCB4	39	PLCB4	4	0.0114303
VAV2	40	VAV2	4	0.0118013
ALAS1	41	ALAS1	4	0.0119426
ACACA	42	ACACA	4	0.0119956
GNAS	43	GNAS	4	0.0123666
SUCLG1	44	SUCLG1	4	0.0138153
AGK	45	AGK	4	0.0145396
SMARCA4	46	SMARCA4	10	0.0146456
PRKCE	47	PRKCE	4	0.0156703
GALNT7	48	GALNT7	5	0.0158823
POLR1A	49	POLR1A	3	0.0160589
ACO1	50	ACO1	4	0.0162533
NNT	51	NNT	6	0.0163769
MAP3K1	52	MAP3K1	5	0.0163946
APC	53	APC	6	0.0164123
LAMA1	54	LAMA1	5	0.0179493
POLE	55	POLE	4	0.0193449
PREX1	56	PREX1	6	0.0193803
ADCY2	57	ADCY2	3	0.0195393
PRKCD	58	PRKCD	2	0.0209702
HK1	59	HK1	3	0.0209879
PIK3R5	60	PIK3R5	3	0.0211116
F2	61	F2	3	0.0216592
GRIN2B	62	GRIN2B	5	0.0216592
CACNA1C	63	CACNA1C	5	0.0218006
COL1A2	64	COL1A2	6	0.0222776
ALDOB	65	ALDOB	3	0.0224189
PIK3CG	66	PIK3CG	3	0.0224189
AOX1	67	AOX1	7	0.0234082
CACNA1S	68	CACNA1S	7	0.0234259
HDAC1	69	HDAC1	2	0.0237616
PLCB2	70	PLCB2	2	0.0238852
FGFR1	71	FGFR1	4	0.0240972
CYP1A2	72	CYP1A2	3	0.0242032
AASS	73	AASS	4	0.0245919
ITPR2	74	ITPR2	4	0.0251572
NUP160	75	NUP160	6	0.0251572
TYR	76	TYR	3	0.0263232
ATP6V1B1	77	ATP6V1B1	3	0.0267649
RDH11	78	RDH11	3	0.0268179
PNLIP	79	PNLIP	3	0.0270476
PAH	80	PAH	3	0.0273302
PTCH1	81	PTCH1	7	0.0277896
MTHFD1	82	MTHFD1	4	0.0280192
HLA-DRB5	83	HLA-DRB5	7	0.0282666
ADCY3	84	ADCY3	3	0.0285316
ITGA6	85	ITGA6	4	0.0298035
UGT2A1	86	UGT2A1	3	0.0299802
CHSY1	87	CHSY1	3	0.0301745
DMGDH	88	DMGDH	4	0.0302805
ACSM2A	89	ACSM2A	3	0.0304925
CNDP1	90	CNDP1	3	0.0308989
JAK2	91	JAK2	5	0.0310225
CLTCL1	92	CLTCL1	6	0.0310579
ACSS2	93	ACSS2	3	0.0320825
EGF	94	EGF	4	0.0321179
GCNT2	95	GCNT2	4	0.0322945
MAP3K4	96	MAP3K4	4	0.0326302
ITGB1	97	ITGB1	3	0.0331779
PLG	98	PLG	5	0.0334075
SHC1	99	SHC1	2	0.0345029
THBS1	100	THBS1	6	0.0346442
GALNT11	101	GALNT11	3	0.0347679
FGFR3	102	FGFR3	6	0.0360399
PIK3R1	103	PIK3R1	2	0.0361989
NCOR1	104	NCOR1	5	0.0368525
ABL1	105	ABL1	4	0.0374002
G6PC	106	G6PC	2	0.0381068
CUL1	107	CUL1	3	0.0386015
POLR1B	108	POLR1B	2	0.0390255
TCEB1	109	TCEB1	3	0.0391668
NFATC4	110	NFATC4	4	0.0392375
GUSB	111	GUSB	4	0.0404035
POLD1	112	POLD1	3	0.0405625
POLR3A	113	POLR3A	4	0.0408805
GLB1	114	GLB1	4	0.0422938
GOT1	115	GOT1	3	0.0423822
GRIN2A	116	GRIN2A	4	0.0425765
ADCY9	117	ADCY9	3	0.0435658
PLD1	118	PLD1	2	0.0440428
LAMA3	119	LAMA3	4	0.0443255
ITGB5	120	ITGB5	3	0.0451382
CYP8B1	121	CYP8B1	3	0.0474701
CAMK2G	122	CAMK2G	2	0.0481061
CBLB	123	CBLB	2	0.0489365
JAK1	124	JAK1	4	0.0490778
BCAR1	125	BCAR1	3	0.0497491
GOT2	126	GOT2	2	0.0497491
SMURF2	127	SMURF2	3	0.0500671
ATP5B	128	ATP5B	2	0.0505971
GBF1	129	GBF1	6	0.0512508
PPAP2C	130	PPAP2C	2	0.0512685
ALDOA	131	ALDOA	2	0.0512685
PRKCQ	132	PRKCQ	3	0.0521695
MAN1A1	133	MAN1A1	2	0.0526818
PGK1	134	PGK1	2	0.0527348
ATP5A1	135	ATP5A1	2	0.0527878
JUN	136	JUN	2	0.0528761
PCDH15	137	PCDH15	11	0.0538125
CYP11B2	138	CYP11B2	2	0.0541128
TSC2	139	TSC2	4	0.0542011
HLA-B	140	HLA-B	5	0.0546781
UGT1A8	141	UGT1A8	2	0.0551374
ENO1	142	ENO1	2	0.0552434
PTPN6	143	PTPN6	3	0.0552788
PRKG1	144	PRKG1	2	0.0555261
NMNAT3	145	NMNAT3	2	0.0561268
ACADS	146	ACADS	2	0.0561798
MGAM	147	MGAM	3	0.0563741
MAPK9	148	MAPK9	2	0.0570984
CCNB2	149	CCNB2	6	0.0572221
PRKACG	150	PRKACG	2	0.0576461
INPP5E	151	INPP5E	2	0.0579111
PTDSS1	152	PTDSS1	2	0.0579818
LAMC1	153	LAMC1	3	0.0583351
HPSE2	154	HPSE2	2	0.0583704
C3	155	C3	6	0.0585824
SHMT2	156	SHMT2	3	0.0592184
ROCK1	157	ROCK1	4	0.0594658
SPAM1	158	SPAM1	4	0.0595188
MTAP	159	MTAP	2	0.0598368
CDH2	160	CDH2	5	0.0598721
HLA-A	161	HLA-A	4	0.0607554
TTN	162	TTN	22	0.0611264
GRM1	163	GRM1	4	0.0614621
NRG1	164	NRG1	4	0.0614621
GLS	165	GLS	4	0.0619568
PNPLA3	166	PNPLA3	2	0.0620981
SMS	167	SMS	2	0.0626634
G6PD	168	G6PD	2	0.0628401
PGM2	169	PGM2	2	0.0628401
ST6GALNAC5	170	ST6GALNAC5	2	0.0628401
LAP3	171	LAP3	2	0.0643241
SETD2	172	SETD2	51	0.0648717
AGMAT	173	AGMAT	2	0.0651014
ARID1A	174	ARID1A	12	0.0652074
MAP3K12	175	MAP3K12	3	0.0668327
CDKN2A	176	CDKN2A	5	0.0670977
HRAS	177	HRAS	1	0.0672744
MCCC2	178	MCCC2	4	0.0675747
P4HA1	179	P4HA1	2	0.0685817
ALG10B	180	ALG10B	2	0.0686701
PRKCH	181	PRKCH	2	0.0687761
AKR1B10	182	AKR1B10	2	0.0703837
WASL	183	WASL	6	0.0710727
COPA	184	COPA	4	0.0711787
ZFYVE9	185	ZFYVE9	4	0.0738817
PIK3R2	186	PIK3R2	2	0.074606
CHRM2	187	CHRM2	2	0.0825383
JAK3	188	JAK3	4	0.08351
CASP10	189	CASP10	3	0.083775
PIP5K1A	190	PIP5K1A	2	0.0840047
PLCB3	191	PLCB3	1	0.0849763
MYH2	192	MYH2	7	0.0867783
NUPL2	193	NUPL2	4	0.0878206
FLT4	194	FLT4	6	0.0880856
NUP214	195	NUP214	2	0.0924316
POLR2F	196	POLR2F	1	0.0929793
IRS1	197	IRS1	3	0.093474
CACNA1D	198	CACNA1D	4	0.0945516
NTRK1	199	NTRK1	4	0.0961946
CCR5	200	CCR5	2	0.0972899
ARHGAP5	201	ARHGAP5	7	0.0976786
HCK	202	HCK	2	0.0993393
HLA-DQB1	203	HLA-DQB1	4	0.10047
SEPHS2	204	SEPHS2	2	0.101336
CCNA1	205	CCNA1	4	0.102237
BIRC2	206	BIRC2	3	0.103226
CDC42	207	CDC42	1	0.103226
NOTCH1	208	NOTCH1	5	0.103685
RYR3	209	RYR3	7	0.103968
KDR	210	KDR	5	0.104127
TAF1	211	TAF1	5	0.104728
RPN1	212	RPN1	2	0.105081
SMPD2	213	SMPD2	2	0.10554
TIAM1	214	TIAM1	2	0.106371
ERBB3	215	ERBB3	3	0.107431
MET	216	MET	3	0.108579
TPO	217	TPO	3	0.108579
PRKCI	218	PRKCI	1	0.108703
UQCRFS1	219	UQCRFS1	3	0.108703
PIP5K1C	220	PIP5K1C	2	0.110081
PLAUR	221	PLAUR	3	0.110734
BTRC	222	BTRC	2	0.111035
LAMC2	223	LAMC2	5	0.111035
TGFBR2	224	TGFBR2	1	0.111423
ERBB4	225	ERBB4	6	0.111759
PML	226	PML	3	0.111759
ACSS1	227	ACSS1	3	0.114232
ATP6V1A	228	ATP6V1A	2	0.115345
CACNA1F	229	CACNA1F	3	0.115345
ITGAM	230	ITGAM	3	0.115663
CXCR4	231	CXCR4	1	0.115911
SRC	232	SRC	2	0.115911
PIGU	233	PIGU	1	0.116423
FZR1	234	FZR1	4	0.117536
PROS1	235	PROS1	4	0.117536
RELA	236	RELA	1	0.117995
ATP6V1B2	237	ATP6V1B2	2	0.118207
OGDH	238	OGDH	3	0.11849
TUSC3	239	TUSC3	1	0.118702
NFE2L2	240	NFE2L2	8	0.118949
IDS	241	IDS	2	0.119426
ACACB	242	ACACB	2	0.119621
GRIK2	243	GRIK2	4	0.120292
AVPR2	244	AVPR2	2	0.120557
BMPR2	245	BMPR2	3	0.120557
PPP3CC	246	PPP3CC	1	0.120557
INPP5B	247	INPP5B	2	0.121052
EEA1	248	EEA1	5	0.121211
FYN	249	FYN	1	0.121511
NDUFS8	250	NDUFS8	1	0.121511
PRKACA	251	PRKACA	1	0.122147
TK2	252	TK2	1	0.122748
COL6A6	253	COL6A6	9	0.123083
PAFAH1B1	254	PAFAH1B1	1	0.123225
GRM5	255	GRM5	4	0.123348
PIGM	256	PIGM	1	0.123525
DLD	257	DLD	2	0.123684
SUPT5H	258	SUPT5H	5	0.123878
ACTN2	259	ACTN2	3	0.124179
ATP5G2	260	ATP5G2	1	0.12432
ATP5C1	261	ATP5C1	1	0.124885
BRCA1	262	BRCA1	5	0.124885
MYH11	263	MYH11	6	0.124974
NDUFV2	264	NDUFV2	1	0.125539
VAV1	265	VAV1	2	0.125539
SYNJ1	266	SYNJ1	4	0.126687
PPARGC1A	267	PPARGC1A	3	0.126811
UBE2D3	268	UBE2D3	1	0.126811
SLC3A2	269	SLC3A2	2	0.126987
COL5A3	270	COL5A3	9	0.127429
HPSE	271	HPSE	2	0.127429
TGFB2	272	TGFB2	2	0.127429
CDH23	273	CDH23	6	0.129178
CTNNB1	274	CTNNB1	1	0.129178
RUNX2	275	RUNX2	2	0.129938
ACADM	276	ACADM	1	0.130097
ARSB	277	ARSB	1	0.130291
GNB1	278	GNB1	2	0.131139
HSD17B4	279	HSD17B4	1	0.131351
NFATC3	280	NFATC3	3	0.132711
CALML5	281	CALML5	1	0.133665
SMPD1	282	SMPD1	1	0.133665
IDH3G	283	IDH3G	1	0.133895
NDUFB6	284	NDUFB6	1	0.134407
PMVK	285	PMVK	1	0.134619
BRCA2	286	BRCA2	8	0.134884
XYLT2	287	XYLT2	2	0.134884
ARHGEF7	288	ARHGEF7	3	0.135591
UGT2B4	289	UGT2B4	2	0.135591
TALDO1	290	TALDO1	2	0.136262
ALDH2	291	ALDH2	3	0.136669
RIPK2	292	RIPK2	1	0.136669
GBA	293	GBA	2	0.136987
OPRD1	294	OPRD1	3	0.136987
NOTCH2	295	NOTCH2	9	0.137393
FUT6	296	FUT6	3	0.137587
ADH1A	297	ADH1A	2	0.137746
ITGAL	298	ITGAL	4	0.137746
CHRM3	299	CHRM3	2	0.138594
NFAT5	300	NFAT5	5	0.138594
GAL3ST1	301	GAL3ST1	2	0.138789
PAK1	302	PAK1	1	0.138789
PAPSS2	303	PAPSS2	2	0.138789
MYH13	304	MYH13	4	0.139071
RAC1	305	RAC1	1	0.139071
ADSSL1	306	ADSSL1	1	0.139513
CARD11	307	CARD11	4	0.139707
UPP2	308	UPP2	2	0.139707
SCP2	309	SCP2	2	0.139955
UGT1A6	310	UGT1A6	1	0.139955
CYP2J2	311	CYP2J2	2	0.140167
FZD4	312	FZD4	3	0.140485
GDA	313	GDA	1	0.140485
TPK1	314	TPK1	1	0.140485
B3GALT2	315	B3GALT2	2	0.141209
AK7	316	AK7	1	0.141439
ASNS	317	ASNS	1	0.141686
GRHPR	318	GRHPR	2	0.141916
PSAT1	319	PSAT1	1	0.142181
NF1	320	NF1	7	0.143258
RRM1	321	RRM1	2	0.143258
HSPA1L	322	HSPA1L	3	0.143453
DEGS1	323	DEGS1	2	0.143735
LIPC	324	LIPC	1	0.143735
ATF2	325	ATF2	1	0.144018
HTR1E	326	HTR1E	3	0.144018
POLA1	327	POLA1	1	0.144018
DHX9	328	DHX9	4	0.144195
KIF13A	329	KIF13A	4	0.145113
CYP19A1	330	CYP19A1	2	0.145749
FLT1	331	FLT1	4	0.145997
ADRB2	332	ADRB2	2	0.146262
PON3	333	PON3	2	0.146951
TLN1	334	TLN1	3	0.147216
ACSM3	335	ACSM3	2	0.147428
MGAT4A	336	MGAT4A	2	0.147428
PDHB	337	PDHB	1	0.147428
GRID2	338	GRID2	4	0.147763
ODC1	339	ODC1	1	0.147763
ST3GAL3	340	ST3GAL3	1	0.147763
GABRG2	341	GABRG2	4	0.148081
PAK6	342	PAK6	4	0.148435
DGKH	343	DGKH	2	0.148717
NDUFA6	344	NDUFA6	1	0.148717
RBMX	345	RBMX	4	0.149071
ACLY	346	ACLY	3	0.149459
PARD3	347	PARD3	2	0.149459
AMDHD1	348	AMDHD1	1	0.151014
POLG2	349	POLG2	4	0.151261
SHMT1	350	SHMT1	2	0.151915
STAT6	351	STAT6	4	0.151915
SDHB	352	SDHB	1	0.152233
CYP2U1	353	CYP2U1	1	0.152869
MLLT4	354	MLLT4	5	0.153275
PROC	355	PROC	4	0.153805
FN1	356	FN1	3	0.154671
SLC25A5	357	SLC25A5	3	0.154671
CNGA3	358	CNGA3	3	0.155042
HADH	359	HADH	1	0.155042
ELK1	360	ELK1	1	0.155431
CPOX	361	CPOX	1	0.155802
DAK	362	DAK	1	0.155802
CAD	363	CAD	4	0.15695
PRPF8	364	PRPF8	4	0.15695
FLT3	365	FLT3	2	0.157833
FUK	366	FUK	1	0.160148
DPYS	367	DPYS	2	0.160448
KIT	368	KIT	3	0.161437
NT5C1B	369	NT5C1B	1	0.161437
ITPKA	370	ITPKA	1	0.161879
NUP98	371	NUP98	2	0.162851
GABRQ	372	GABRQ	4	0.163222
SMARCA2	373	SMARCA2	4	0.164511
CYP11A1	374	CYP11A1	1	0.165077
DPYD	375	DPYD	1	0.166437
PCDH7	376	PCDH7	6	0.166932
PPAP2B	377	PPAP2B	1	0.167444
L1CAM	378	L1CAM	4	0.167992
NUP205	379	NUP205	4	0.167992
ALDH7A1	380	ALDH7A1	1	0.169016
DGKG	381	DGKG	1	0.169016
APC2	382	APC2	3	0.169352
CAMK2D	383	CAMK2D	1	0.169352
TGFB3	384	TGFB3	1	0.169352
ARF6	385	ARF6	1	0.170112
GPR50	386	GPR50	3	0.170112
AQR	387	AQR	7	0.170553
CHRNA1	388	CHRNA1	4	0.170553
GRK6	389	GRK6	3	0.172355
MYH3	390	MYH3	5	0.172762
PCDH10	391	PCDH10	7	0.172762
RPL4	392	RPL4	2	0.172762
YES1	393	YES1	1	0.172762
NDST2	394	NDST2	2	0.17338
CYP4F2	395	CYP4F2	1	0.175023
EXT1	396	EXT1	1	0.175023
MAPK3	397	MAPK3	1	0.175023
TRIT1	398	TRIT1	2	0.175995
LTA4H	399	LTA4H	4	0.176595
ATP2A1	400	ATP2A1	6	0.179263
SGPL1	401	SGPL1	3	0.179263
SLC33A1	402	SLC33A1	2	0.181189
GALNT9	403	GALNT9	1	0.184563
DAO	404	DAO	1	0.185888
TUBA4A	405	TUBA4A	2	0.185888
SMC3	406	SMC3	5	0.187019
ACVR1B	407	ACVR1B	4	0.187778
COL11A1	408	COL11A1	8	0.187778
DCTD	409	DCTD	1	0.190075
ITPR3	410	ITPR3	2	0.190817
FGFR2	411	FGFR2	2	0.193008
MAP3K10	412	MAP3K10	3	0.193008
PCDHB7	413	PCDHB7	4	0.193008
PLCB1	414	PLCB1	1	0.196771
SIN3A	415	SIN3A	2	0.196771
AKAP9	416	AKAP9	11	0.199968
PPP2R1A	417	PPP2R1A	2	0.199968
UPB1	418	UPB1	2	0.199968
CHRM5	419	CHRM5	2	0.200834
KALRN	420	KALRN	4	0.202813
TAF1C	421	TAF1C	4	0.204668
GRIK1	422	GRIK1	3	0.205675
MYLK	423	MYLK	4	0.205675
MAP4K3	424	MAP4K3	4	0.208695
KITLG	425	KITLG	2	0.21048
PSMA6	426	PSMA6	3	0.211663
STAT3	427	STAT3	1	0.211663
TPR	428	TPR	2	0.211663
ATP1A1	429	ATP1A1	6	0.212582
UBE4B	430	UBE4B	5	0.215409
SSTR1	431	SSTR1	2	0.21631
CDH18	432	CDH18	5	0.217175
BIRC3	433	BIRC3	2	0.222811
GRIN3B	434	GRIN3B	3	0.222811
TUBB1	435	TUBB1	2	0.222811
ARFGEF2	436	ARFGEF2	3	0.225231
ITGA3	437	ITGA3	2	0.225231
PPP2CB	438	PPP2CB	1	0.226168
RPS6KA1	439	RPS6KA1	2	0.226168
PARD6A	440	PARD6A	2	0.227016
EGR2	441	EGR2	1	0.228712
PAPOLA	442	PAPOLA	3	0.228712
CCKBR	443	CCKBR	2	0.229542
MYH7B	444	MYH7B	4	0.229542
ACTG1	445	ACTG1	2	0.230461
APOB	446	APOB	5	0.230461
BMP7	447	BMP7	2	0.230461
NUP93	448	NUP93	2	0.230461
STAT2	449	STAT2	3	0.230461
THBS4	450	THBS4	3	0.230461
THBS3	451	THBS3	5	0.232139
MACF1	452	MACF1	7	0.233517
GRM4	453	GRM4	3	0.234312
ADCY1	454	ADCY1	1	0.234877
MYH1	455	MYH1	3	0.235584
PCYT1B	456	PCYT1B	1	0.236467
POM121	457	POM121	2	0.236467
PRKG2	458	PRKG2	2	0.236467
SF3B1	459	SF3B1	4	0.236467
TRAF6	460	TRAF6	1	0.236997
GRB7	461	GRB7	2	0.237669
CDH1	462	CDH1	2	0.239594
ERBB2	463	ERBB2	4	0.243039
TNFRSF1A	464	TNFRSF1A	1	0.243039
HLA-DPB1	465	HLA-DPB1	2	0.245142
CDH4	466	CDH4	4	0.245813
SF3B3	467	SF3B3	3	0.245813
GRIN1	468	GRIN1	2	0.247562
TACR3	469	TACR3	2	0.249717
MAX	470	MAX	3	0.25083
GNAI3	471	GNAI3	1	0.251378
ST3GAL1	472	ST3GAL1	1	0.25189
PCF11	473	PCF11	4	0.253251
SH3KBP1	474	SH3KBP1	3	0.253251
EIF3A	475	EIF3A	3	0.253692
POLR1C	476	POLR1C	3	0.254134
GRIK5	477	GRIK5	3	0.255883
GALNT2	478	GALNT2	1	0.257579
MYH4	479	MYH4	3	0.258162
RASA1	480	RASA1	3	0.258551
RPL30	481	RPL30	2	0.258886
EIF4A2	482	EIF4A2	3	0.259416
ITPR1	483	ITPR1	1	0.260741
RBM8A	484	RBM8A	2	0.26272
ADCYAP1R1	485	ADCYAP1R1	2	0.263586
CTNNA2	486	CTNNA2	4	0.263586
PAK4	487	PAK4	2	0.263586
TCF3	488	TCF3	3	0.264045
DCHS1	489	DCHS1	4	0.264363
NMUR2	490	NMUR2	4	0.264363
MAP3K7	491	MAP3K7	1	0.265034
HSP90B1	492	HSP90B1	4	0.266006
PCBP2	493	PCBP2	2	0.266501
COL4A1	494	COL4A1	1	0.267614
COL6A2	495	COL6A2	5	0.267614
GABRB1	496	GABRB1	3	0.267614
PPP2CA	497	PPP2CA	1	0.267614
CEBPA	498	CEBPA	1	0.268073
FUS	499	FUS	2	0.268073
IL18RAP	500	IL18RAP	3	0.268073
RPS27A	501	RPS27A	1	0.269946
ADRBK1	502	ADRBK1	1	0.270405
ITGA1	503	ITGA1	3	0.270405
HSPA5	504	HSPA5	2	0.272472
ACTN4	505	ACTN4	1	0.273479
RPS21	506	RPS21	2	0.273479
AKT3	507	AKT3	2	0.274044
NUP133	508	NUP133	2	0.274044
CABIN1	509	CABIN1	5	0.275034
UBE2D1	510	UBE2D1	2	0.275034
BCL3	511	BCL3	1	0.275846
DRD3	512	DRD3	2	0.276341
GABRE	513	GABRE	4	0.276341
HSPA2	514	HSPA2	1	0.2768
MYH7	515	MYH7	2	0.277224
NCOA1	516	NCOA1	2	0.277224
TCF7	517	TCF7	2	0.277224
NRIP1	518	NRIP1	6	0.277754
ATP2A2	519	ATP2A2	4	0.278744
CNGA4	520	CNGA4	2	0.279839
IL6ST	521	IL6ST	3	0.279839
GNG3	522	GNG3	1	0.280475
TAF4	523	TAF4	2	0.280475
ATR	524	ATR	5	0.281076
LRP1	525	LRP1	4	0.281076
MCM7	526	MCM7	4	0.281076
PPP5C	527	PPP5C	2	0.281076
SMC1A	528	SMC1A	2	0.281076
BCL6	529	BCL6	5	0.281694
XRN2	530	XRN2	3	0.282259
NCOR2	531	NCOR2	3	0.282772
SLC25A4	532	SLC25A4	2	0.282772
CREM	533	CREM	1	0.283425
RAP1A	534	RAP1A	1	0.283425
RIPK1	535	RIPK1	1	0.284432
STAG2	536	STAG2	7	0.284432
CTNNA1	537	CTNNA1	2	0.284909
DNAJC3	538	DNAJC3	2	0.28627
ELK4	539	ELK4	1	0.28627
TAF4B	540	TAF4B	2	0.28627
MAP3K2	541	MAP3K2	2	0.287259
FAT2	542	FAT2	3	0.288054
PPYR1	543	PPYR1	2	0.288054
CR1	544	CR1	6	0.288637
AP1G1	545	AP1G1	3	0.290351
GRB10	546	GRB10	1	0.290351
HSP90AB1	547	HSP90AB1	3	0.290351
TRADD	548	TRADD	1	0.290351
CALM2	549	CALM2	1	0.290898
CSF1R	550	CSF1R	5	0.290898
PIK3CB	551	PIK3CB	1	0.290898
CACNA1G	552	CACNA1G	3	0.291375
IL4R	553	IL4R	2	0.291375
CAMK2B	554	CAMK2B	1	0.292011
NCOA2	555	NCOA2	2	0.292011
ETF1	556	ETF1	3	0.292665
REL	557	REL	1	0.292665
ROCK2	558	ROCK2	2	0.293248
GRM2	559	GRM2	2	0.293919
RGS3	560	RGS3	5	0.293919
TUBB2B	561	TUBB2B	2	0.293919
DCHS2	562	DCHS2	4	0.294308
MC3R	563	MC3R	2	0.294308
PTGS2	564	PTGS2	4	0.294308
HGS	565	HGS	2	0.294855
INPPL1	566	INPPL1	2	0.294855
P2RX2	567	P2RX2	3	0.295191
DUSP8	568	DUSP8	1	0.29565
ABCC3	569	ABCC3	7	0.297717
DOCK2	570	DOCK2	5	0.297717
NOD2	571	NOD2	3	0.297717
ITGB7	572	ITGB7	2	0.298318
BDKRB1	573	BDKRB1	1	0.298795
STAT5B	574	STAT5B	1	0.298795
RASGRF1	575	RASGRF1	3	0.299396
SMAD4	576	SMAD4	1	0.299396
CACNA1I	577	CACNA1I	4	0.300579
PHKA2	578	PHKA2	3	0.300579
MAPKAPK2	579	MAPKAPK2	2	0.301763
GLG1	580	GLG1	4	0.302311
EIF2AK2	581	EIF2AK2	4	0.303123
GRM8	582	GRM8	2	0.303123
LONP2	583	LONP2	3	0.303706
VCP	584	VCP	4	0.303706
FLNA	585	FLNA	2	0.304448
SFRP4	586	SFRP4	4	0.30512
IQGAP1	587	IQGAP1	4	0.30565
PPP3R2	588	PPP3R2	1	0.30565
PRKCG	589	PRKCG	1	0.307469
RAD50	590	RAD50	4	0.308335
CDK4	591	CDK4	1	0.309112
BID	592	BID	1	0.309784
SMAD2	593	SMAD2	2	0.309784
GRM6	594	GRM6	3	0.310897
PHKG1	595	PHKG1	3	0.310897
ANKRD36	596	ANKRD36	11	0.311586
KNG1	597	KNG1	2	0.311586
CLIP1	598	CLIP1	5	0.312116
PHKA1	599	PHKA1	3	0.31284
THRA	600	THRA	2	0.31284
ADRBK2	601	ADRBK2	1	0.313564
PTK2B	602	PTK2B	2	0.314377
VCL	603	VCL	2	0.314377
LAMA4	604	LAMA4	5	0.315154
TAF5	605	TAF5	2	0.315154
SSRP1	606	SSRP1	2	0.315773
CPSF1	607	CPSF1	3	0.316603
IFNA8	608	IFNA8	2	0.317398
NOTCH3	609	NOTCH3	3	0.317398
FGD1	610	FGD1	3	0.318052
MYH6	611	MYH6	1	0.318052
REST	612	REST	3	0.318052
RPS3	613	RPS3	2	0.318052
RPL5	614	RPL5	3	0.318493
IL2RA	615	IL2RA	2	0.319147
RFC1	616	RFC1	3	0.319147
LAMC3	617	LAMC3	4	0.319871
FIGF	618	FIGF	3	0.320613
P2RX1	619	P2RX1	2	0.320613
CAMK2A	620	CAMK2A	1	0.321143
PDE3B	621	PDE3B	1	0.321143
TERT	622	TERT	4	0.321903
PDE3A	623	PDE3A	4	0.322521
CPSF3	624	CPSF3	2	0.32374
PRLR	625	PRLR	2	0.32374
RAB11FIP3	626	RAB11FIP3	3	0.32374
TFDP2	627	TFDP2	5	0.32374
COL3A1	628	COL3A1	2	0.324412
SRGAP1	629	SRGAP1	4	0.325101
ABCA1	630	ABCA1	6	0.327486
ADAM10	631	ADAM10	4	0.327486
MED13	632	MED13	8	0.327486
ATP1A2	633	ATP1A2	5	0.328104
HSPA6	634	HSPA6	1	0.328104
BRAF	635	BRAF	1	0.329535
TLR2	636	TLR2	2	0.329535
RAPGEF2	637	RAPGEF2	6	0.33033
GRM3	638	GRM3	2	0.332026
MPO	639	MPO	4	0.332026
LRP2	640	LRP2	5	0.332874
HLA-E	641	HLA-E	2	0.333651
NKD1	642	NKD1	2	0.333651
TBCD	643	TBCD	2	0.334393
PSMD2	644	PSMD2	2	0.335082
PLA2G6	645	PLA2G6	2	0.335824
ARHGEF17	646	ARHGEF17	7	0.336619
CCNB3	647	CCNB3	6	0.336619
CCNH	648	CCNH	1	0.336619
CDH8	649	CDH8	4	0.336619
EIF2AK4	650	EIF2AK4	3	0.336619
HTR1A	651	HTR1A	2	0.336619
GTF2H1	652	GTF2H1	2	0.337556
SNRPB	653	SNRPB	1	0.337556
ANAPC1	654	ANAPC1	3	0.338351
CDH3	655	CDH3	2	0.338351
CLSPN	656	CLSPN	4	0.338351
IFNGR1	657	IFNGR1	2	0.338351
A2M	658	A2M	3	0.339146
PPP2R5B	659	PPP2R5B	2	0.339146
SMAD3	660	SMAD3	1	0.339146
TBP	661	TBP	1	0.339958
CXCR7	662	CXCR7	2	0.340983
ITGA4	663	ITGA4	1	0.340983
MAPK14	664	MAPK14	1	0.340983
NUP50	665	NUP50	1	0.340983
CD4	666	CD4	2	0.341654
GTF2F1	667	GTF2F1	1	0.342414
CHRNB4	668	CHRNB4	3	0.343121
GLP2R	669	GLP2R	2	0.343121
IL1RAP	670	IL1RAP	4	0.343121
CSF3R	671	CSF3R	2	0.34487
DNAH10	672	DNAH10	8	0.34487
LEP	673	LEP	1	0.345665
SAR1B	674	SAR1B	2	0.34646
CTSB	675	CTSB	3	0.347255
ALMS1	676	ALMS1	6	0.348103
CD28	677	CD28	1	0.348103
CFTR	678	CFTR	4	0.348103
KRAS	679	KRAS	1	0.348103
SPTAN1	680	SPTAN1	2	0.348103
CDC23	681	CDC23	2	0.349958
EIF4E	682	EIF4E	1	0.349958
AXIN2	683	AXIN2	1	0.350788
HSPG2	684	HSPG2	4	0.350788
PCDH11X	685	PCDH11X	3	0.350788
ACIN1	686	ACIN1	2	0.351707
PDE1C	687	PDE1C	1	0.351707
PCNA	688	PCNA	3	0.352519
LAMA2	689	LAMA2	3	0.353491
SLC9A1	690	SLC9A1	2	0.353491
TUBGCP6	691	TUBGCP6	4	0.353491
EGR1	692	EGR1	2	0.354357
PIGR	693	PIGR	3	0.354357
CELSR1	694	CELSR1	4	0.35547
DNAJC10	695	DNAJC10	3	0.35547
IL3	696	IL3	1	0.35547
PSMA4	697	PSMA4	2	0.356371
AP3B1	698	AP3B1	4	0.358226
C8B	699	C8B	2	0.358226
PCDHA5	700	PCDHA5	3	0.358226
RARA	701	RARA	4	0.358226
FGFR4	702	FGFR4	3	0.359109
FZD10	703	FZD10	2	0.359109
NR2C1	704	NR2C1	4	0.359109
GNB5	705	GNB5	1	0.360187
MALT1	706	MALT1	2	0.360187
SPEN	707	SPEN	13	0.360187
CENPF	708	CENPF	4	0.361088
EHHADH	709	EHHADH	3	0.362095
GLI2	710	GLI2	4	0.362095
CDH19	711	CDH19	4	0.363243
RPL18	712	RPL18	2	0.363243
STAM	713	STAM	2	0.363243
HTR4	714	HTR4	1	0.364197
SF3B2	715	SF3B2	2	0.364197
CALR	716	CALR	1	0.365169
CAPN1	717	CAPN1	2	0.365169
CHUK	718	CHUK	1	0.365169
HNRNPC	719	HNRNPC	1	0.365169
MEF2A	720	MEF2A	2	0.365169
RHEB	721	RHEB	5	0.365169
IFNA5	722	IFNA5	1	0.36614
DDX23	723	DDX23	2	0.367165
GYS1	724	GYS1	1	0.367165
PHKB	725	PHKB	3	0.367165
TJP1	726	TJP1	2	0.367165
GRB2	727	GRB2	1	0.368172
INSR	728	INSR	3	0.368172
UBR5	729	UBR5	8	0.368172
COL4A5	730	COL4A5	7	0.369303
HSPH1	731	HSPH1	4	0.369303
SEH1L	732	SEH1L	1	0.369303
NUP62	733	NUP62	1	0.370416
TAF1A	734	TAF1A	3	0.370416
LIMK2	735	LIMK2	2	0.371334
GRIA1	736	GRIA1	4	0.372483
PSMC5	737	PSMC5	2	0.372483
USP6	738	USP6	3	0.372483
ADCY5	739	ADCY5	3	0.373454
ADRA1A	740	ADRA1A	1	0.373454
DNAH1	741	DNAH1	3	0.373454
HLA-DPA1	742	HLA-DPA1	1	0.373454
LEPR	743	LEPR	1	0.373454
PARD6B	744	PARD6B	3	0.373454
PCBP1	745	PCBP1	1	0.373454
SCARB2	746	SCARB2	4	0.373454
SYVN1	747	SYVN1	2	0.373454
FBXO4	748	FBXO4	1	0.374673
IFNB1	749	IFNB1	2	0.374673
LTA	750	LTA	1	0.376811
MCHR2	751	MCHR2	2	0.377959
SVEP1	752	SVEP1	4	0.377959
TNR	753	TNR	8	0.377959
BMPR1B	754	BMPR1B	1	0.378895
RYR2	755	RYR2	4	0.378895
COL5A1	756	COL5A1	3	0.380061
NFATC1	757	NFATC1	1	0.380061
PRSS1	758	PRSS1	3	0.380061
RPL34	759	RPL34	1	0.380061
SLU7	760	SLU7	3	0.380061
GABRA4	761	GABRA4	2	0.381475
CENPE	762	CENPE	5	0.382676
MAP3K11	763	MAP3K11	1	0.382676
AXIN1	764	AXIN1	2	0.383877
COL15A1	765	COL15A1	6	0.383877
SSTR4	766	SSTR4	1	0.385079
VWF	767	VWF	3	0.385079
GNA13	768	GNA13	4	0.386633
CCKAR	769	CCKAR	2	0.387782
M6PR	770	M6PR	2	0.387782
DNAH5	771	DNAH5	4	0.388983
IL21R	772	IL21R	2	0.388983
CTNND1	773	CTNND1	4	0.390078
DNAH9	774	DNAH9	6	0.390078
HRH4	775	HRH4	1	0.390078
SLC12A2	776	SLC12A2	4	0.391297
TUBB3	777	TUBB3	2	0.391297
ADCY6	778	ADCY6	1	0.392516
HLTF	779	HLTF	2	0.392516
TRHR	780	TRHR	2	0.392516
PTPN11	781	PTPN11	1	0.393771
XRCC5	782	XRCC5	2	0.393771
CHRNA2	783	CHRNA2	2	0.395166
HSPA9	784	HSPA9	4	0.395166
RPS2	785	RPS2	1	0.395166
GUCA1B	786	GUCA1B	1	0.396368
NUP153	787	NUP153	1	0.396368
RANGAP1	788	RANGAP1	1	0.396368
ANAPC7	789	ANAPC7	2	0.397657
CCAR1	790	CCAR1	3	0.397657
DDB1	791	DDB1	3	0.397657
BLM	792	BLM	7	0.399
FZD1	793	FZD1	2	0.399
RPS24	794	RPS24	1	0.40036
SEC23A	795	SEC23A	3	0.40036
WEE1	796	WEE1	1	0.40036
DYNC2H1	797	DYNC2H1	3	0.40165
FASLG	798	FASLG	1	0.40165
GATA2	799	GATA2	5	0.40165
GNAI1	800	GNAI1	1	0.40165
OPRM1	801	OPRM1	2	0.40165
RAPGEF6	802	RAPGEF6	5	0.40165
UBR1	803	UBR1	7	0.40165
GRIA2	804	GRIA2	3	0.403081
GRIK3	805	GRIK3	2	0.403081
KIF2A	806	KIF2A	4	0.403081
SELE	807	SELE	4	0.403081
CBLC	808	CBLC	1	0.404265
CLCA4	809	CLCA4	2	0.404265
DAXX	810	DAXX	4	0.404265
PPP2R2B	811	PPP2R2B	4	0.404265
PTPRM	812	PTPRM	3	0.404265
PCSK2	813	PCSK2	3	0.405696
RPS26	814	RPS26	1	0.405696
IFNA1	815	IFNA1	2	0.406932
KPNA1	816	KPNA1	1	0.406932
CAPN3	817	CAPN3	3	0.408381
DNHD1	818	DNHD1	5	0.408381
F5	819	F5	3	0.408381
KIF20A	820	KIF20A	3	0.408381
ATF1	821	ATF1	2	0.409706
DNAH3	822	DNAH3	3	0.409706
DVL1	823	DVL1	1	0.409706
RPS3A	824	RPS3A	1	0.409706
DRD1	825	DRD1	1	0.411049
FBXW11	826	FBXW11	1	0.411049
HTR1F	827	HTR1F	1	0.411049
MC5R	828	MC5R	1	0.411049
MYO9A	829	MYO9A	2	0.411049
RASGRF2	830	RASGRF2	2	0.411049
RPS13	831	RPS13	1	0.411049
GNG12	832	GNG12	1	0.412321
IL19	833	IL19	2	0.412321
ATP1A3	834	ATP1A3	3	0.413999
CDH22	835	CDH22	2	0.413999
FOXO1	836	FOXO1	2	0.413999
HNRNPA0	837	HNRNPA0	1	0.413999
GTF2A1	838	GTF2A1	1	0.415289
RPL3L	839	RPL3L	1	0.415289
CNOT1	840	CNOT1	5	0.416755
GABRR1	841	GABRR1	2	0.416755
HRH2	842	HRH2	1	0.416755
ITGB4	843	ITGB4	1	0.416755
NOS3	844	NOS3	2	0.416755
PKN1	845	PKN1	1	0.416755
PRKD1	846	PRKD1	3	0.416755
SMARCE1	847	SMARCE1	2	0.416755
TP73	848	TP73	3	0.416755
MAGI3	849	MAGI3	4	0.41838
PRKAR1A	850	PRKAR1A	2	0.41838
CCND2	851	CCND2	1	0.419864
IFNGR2	852	IFNGR2	1	0.419864
MYH14	853	MYH14	2	0.419864
PDCD6IP	854	PDCD6IP	3	0.419864
RPLP0	855	RPLP0	1	0.419864
GAB1	856	GAB1	1	0.421331
MADCAM1	857	MADCAM1	3	0.421331
PBRM1	858	PBRM1	138	0.421331
RPL3	859	RPL3	1	0.421331
RPS11	860	RPS11	1	0.421331
MAPK12	861	MAPK12	1	0.422726
MCC	862	MCC	4	0.422726
PCDHB3	863	PCDHB3	3	0.422726
ERCC3	864	ERCC3	1	0.424175
RPL28	865	RPL28	1	0.424175
AP3D1	866	AP3D1	3	0.425588
KLRC2	867	KLRC2	4	0.425588
P2RY10	868	P2RY10	1	0.425588
RPS4Y1	869	RPS4Y1	1	0.425588
APPL1	870	APPL1	4	0.427178
JUNB	871	JUNB	2	0.427178
SSH2	872	SSH2	5	0.427178
TP53BP1	873	TP53BP1	5	0.427178
E2F1	874	E2F1	1	0.428627
USP11	875	USP11	1	0.428627
DNM1L	876	DNM1L	2	0.430164
EDN3	877	EDN3	2	0.430164
LRP1B	878	LRP1B	6	0.430164
RELB	879	RELB	1	0.430164
MAP2K6	880	MAP2K6	1	0.431807
NUP85	881	NUP85	2	0.431807
ADCY7	882	ADCY7	1	0.433326
MYL2	883	MYL2	1	0.433326
NPBWR1	884	NPBWR1	1	0.433326
TCEB2	885	TCEB2	1	0.433326
TXNDC5	886	TXNDC5	3	0.433326
C7	887	C7	2	0.434987
MPDZ	888	MPDZ	4	0.434987
PF4	889	PF4	1	0.434987
RND1	890	RND1	3	0.434987
SEC61B	891	SEC61B	1	0.434987
TNN	892	TNN	3	0.434987
CDKN1A	893	CDKN1A	1	0.436524
FAS	894	FAS	1	0.436524
RPL31	895	RPL31	1	0.436524
HLA-DRA	896	HLA-DRA	1	0.438255
AP4B1	897	AP4B1	3	0.439704
FEN1	898	FEN1	1	0.439704
GALR1	899	GALR1	1	0.439704
NCSTN	900	NCSTN	1	0.439704
NFKB1	901	NFKB1	1	0.439704
PIAS1	902	PIAS1	2	0.439704
CLDN10	903	CLDN10	2	0.441259
LEF1	904	LEF1	1	0.441259
PLEKHG2	905	PLEKHG2	4	0.441259
WNT3	906	WNT3	1	0.441259
DNAH7	907	DNAH7	5	0.442601
GABRG1	908	GABRG1	2	0.442601
HDAC6	909	HDAC6	4	0.442601
SLIT2	910	SLIT2	3	0.442601
CDK5RAP2	911	CDK5RAP2	5	0.44428
F2RL2	912	F2RL2	1	0.44428
GTF2E2	913	GTF2E2	2	0.44428
HYOU1	914	HYOU1	4	0.44428
BIRC6	915	BIRC6	4	0.445799
CHD4	916	CHD4	5	0.445799
HSPA4L	917	HSPA4L	2	0.445799
MAML3	918	MAML3	5	0.445799
MMP2	919	MMP2	4	0.445799
PTPRR	920	PTPRR	3	0.445799
TNC	921	TNC	5	0.445799
GLI3	922	GLI3	3	0.447477
HTR7	923	HTR7	1	0.447477
MBTPS1	924	MBTPS1	2	0.447477
PSMA3	925	PSMA3	2	0.447477
WNT10A	926	WNT10A	1	0.447477
CCL3	927	CCL3	1	0.449032
GNPTAB	928	GNPTAB	3	0.449032
LSM7	929	LSM7	1	0.449032
P2RX3	930	P2RX3	1	0.449032
SEC24D	931	SEC24D	2	0.449032
TIAM2	932	TIAM2	2	0.449032
NUP37	933	NUP37	2	0.450746
PTGFR	934	PTGFR	2	0.450746
SEC63	935	SEC63	2	0.450746
STT3B	936	STT3B	2	0.450746
UBE3A	937	UBE3A	1	0.450746
CTNNA3	938	CTNNA3	2	0.4523
GUCY1A3	939	GUCY1A3	2	0.453943
ITGB2	940	ITGB2	1	0.453943
DSP	941	DSP	3	0.455728
ITGB8	942	ITGB8	1	0.455728
SMARCB1	943	SMARCB1	2	0.455728
DCC	944	DCC	3	0.457265
LAMB2	945	LAMB2	3	0.457265
UPF3B	946	UPF3B	1	0.457265
EPS15	947	EPS15	2	0.459049
FBXO2	948	FBXO2	1	0.459049
IL12RB2	949	IL12RB2	2	0.459049
NBN	950	NBN	2	0.459049
SRRM1	951	SRRM1	1	0.459049
PTGER2	952	PTGER2	1	0.460921
RGS17	953	RGS17	2	0.460921
CD86	954	CD86	1	0.462723
MSH6	955	MSH6	3	0.462723
P2RY2	956	P2RY2	1	0.462723
RYR1	957	RYR1	5	0.462723
SEC24A	958	SEC24A	3	0.462723
ANGPT1	959	ANGPT1	3	0.464313
C3AR1	960	C3AR1	1	0.464313
CEP290	961	CEP290	4	0.464313
POLR2I	962	POLR2I	1	0.464313
PRB1	963	PRB1	7	0.464313
EPHB6	964	EPHB6	5	0.465886
IFNA16	965	IFNA16	1	0.465886
LRPPRC	966	LRPPRC	4	0.465886
MYH9	967	MYH9	2	0.465886
PSMD7	968	PSMD7	1	0.465886
TRPV6	969	TRPV6	4	0.465886
ACTN1	970	ACTN1	1	0.467529
AGL	971	AGL	4	0.467529
CDC27	972	CDC27	3	0.467529
EIF2AK3	973	EIF2AK3	2	0.467529
ISY1	974	ISY1	2	0.467529
MC2R	975	MC2R	2	0.467529
BDKRB2	976	BDKRB2	1	0.46896
GTF2F2	977	GTF2F2	1	0.46896
INHBA	978	INHBA	2	0.46896
LAMB3	979	LAMB3	1	0.46896
LMAN1L	980	LMAN1L	2	0.46896
PDIA6	981	PDIA6	2	0.46896
ARHGAP26	982	ARHGAP26	3	0.470514
ROBO2	983	ROBO2	4	0.470514
TBCB	984	TBCB	1	0.470514
DDX3X	985	DDX3X	3	0.472281
F7	986	F7	1	0.472281
GLP1R	987	GLP1R	1	0.472281
GUCY1B3	988	GUCY1B3	1	0.472281
SVIL	989	SVIL	7	0.472281
CTSS	990	CTSS	1	0.47426
LIPE	991	LIPE	4	0.47426
NOX3	992	NOX3	2	0.47426
DYNC1H1	993	DYNC1H1	2	0.476115
GPR35	994	GPR35	1	0.476115
NUPL1	995	NUPL1	1	0.476115
P2RY13	996	P2RY13	1	0.476115
PVRL3	997	PVRL3	2	0.476115
CACNA2D1	998	CACNA2D1	3	0.478146
CPEB1	999	CPEB1	3	0.478146
F9	1000	F9	1	0.478146
GABRA5	1001	GABRA5	1	0.478146
PCNT	1002	PCNT	4	0.478146
RRM2	1003	RRM2	1	0.478146
TYK2	1004	TYK2	3	0.478146
ALB	1005	ALB	2	0.479825
ATP1A4	1006	ATP1A4	3	0.479825
EIF2S3	1007	EIF2S3	1	0.479825
HIST1H2BM	1008	HIST1H2BM	2	0.479825
KLK3	1009	KLK3	2	0.479825
TGFBRAP1	1010	TGFBRAP1	4	0.479825
COL6A1	1011	COL6A1	2	0.481273
FLNC	1012	FLNC	3	0.481273
ZNFX1	1013	ZNFX1	9	0.481273
F11R	1014	F11R	1	0.48304
PDE1A	1015	PDE1A	1	0.48304
TLR8	1016	TLR8	4	0.48304
CSK	1017	CSK	2	0.485248
EIF5A	1018	EIF5A	2	0.485248
LILRB4	1019	LILRB4	6	0.485248
RBM25	1020	RBM25	2	0.485248
SLIT3	1021	SLIT3	5	0.485248
SNAPC1	1022	SNAPC1	2	0.485248
ACVR2A	1023	ACVR2A	1	0.486821
GPAA1	1024	GPAA1	1	0.486821
LAMB4	1025	LAMB4	4	0.486821
PDC	1026	PDC	1	0.486821
EIF2AK1	1027	EIF2AK1	2	0.488764
ELMO1	1028	ELMO1	1	0.488764
PFDN6	1029	PFDN6	1	0.488764
SLC8A1	1030	SLC8A1	1	0.488764
SORT1	1031	SORT1	1	0.488764
TUBA1A	1032	TUBA1A	1	0.488764
WNT3A	1033	WNT3A	1	0.488764
WNT8A	1034	WNT8A	1	0.488764
CALCR	1035	CALCR	1	0.49076
ESPL1	1036	ESPL1	5	0.49076
LAMP2	1037	LAMP2	1	0.49076
TBXA2R	1038	TBXA2R	1	0.49076
USP2	1039	USP2	3	0.49076
ACTC1	1040	ACTC1	1	0.492156
CFL1	1041	CFL1	1	0.492156
F2RL1	1042	F2RL1	1	0.492156
LAMA5	1043	LAMA5	3	0.492156
NPC1	1044	NPC1	2	0.492156
PFDN5	1045	PFDN5	1	0.492156
POU2F1	1046	POU2F1	1	0.492156
SLC2A4	1047	SLC2A4	1	0.492156
ATF6	1048	ATF6	1	0.49394
CDC25C	1049	CDC25C	2	0.49394
FPR1	1050	FPR1	1	0.49394
GTF3C1	1051	GTF3C1	3	0.49394
LIFR	1052	LIFR	2	0.49394
NHP2L1	1053	NHP2L1	1	0.49394
NMBR	1054	NMBR	1	0.49394
PIGK	1055	PIGK	1	0.49394
PSMD11	1056	PSMD11	1	0.49394
ACOX3	1057	ACOX3	2	0.496149
ARHGDIA	1058	ARHGDIA	1	0.496149
BMP6	1059	BMP6	1	0.496149
EIF2S2	1060	EIF2S2	1	0.496149
EXOC4	1061	EXOC4	2	0.496149
PTK2	1062	PTK2	1	0.496149
VPS37A	1063	VPS37A	2	0.496149
WBP11	1064	WBP11	2	0.496149
CTBP2	1065	CTBP2	1	0.498498
DPM2	1066	DPM2	1	0.498498
HERC3	1067	HERC3	3	0.498498
IQGAP2	1068	IQGAP2	3	0.498498
PAPOLG	1069	PAPOLG	4	0.498498
CBL	1070	CBL	1	0.500512
CHRD	1071	CHRD	2	0.500512
HLA-F	1072	HLA-F	1	0.500512
HNRNPA2B1	1073	HNRNPA2B1	1	0.500512
KRT19	1074	KRT19	1	0.500512
MAS1	1075	MAS1	1	0.500512
SOS2	1076	SOS2	1	0.500512
SRGAP3	1077	SRGAP3	2	0.500512
CCT4	1078	CCT4	1	0.502774
CDC25A	1079	CDC25A	1	0.502774
CHD3	1080	CHD3	4	0.502774
CPSF2	1081	CPSF2	2	0.502774
CSNK1G2	1082	CSNK1G2	1	0.502774
GP6	1083	GP6	2	0.502774
RBPJ	1084	RBPJ	2	0.502774
TXN	1085	TXN	1	0.502774
ERCC4	1086	ERCC4	3	0.504947
ERCC6	1087	ERCC6	4	0.504947
NDUFC1	1088	NDUFC1	2	0.504947
PRF1	1089	PRF1	1	0.504947
RPL27	1090	RPL27	2	0.504947
RXRB	1091	RXRB	3	0.504947
SHC3	1092	SHC3	1	0.504947
DDX5	1093	DDX5	2	0.506855
EIF2B2	1094	EIF2B2	1	0.506855
FBXL3	1095	FBXL3	1	0.506855
MAP2K5	1096	MAP2K5	2	0.506855
PCDHB16	1097	PCDHB16	2	0.506855
DMD	1098	DMD	2	0.508798
PSD4	1099	PSD4	3	0.508798
TUBB	1100	TUBB	2	0.508798
WNT2	1101	WNT2	1	0.508798
ABCD4	1102	ABCD4	3	0.510883
ATF4	1103	ATF4	2	0.510883
DCTN1	1104	DCTN1	2	0.510883
DST	1105	DST	18	0.510883
EFTUD2	1106	EFTUD2	2	0.510883
EPHA8	1107	EPHA8	4	0.510883
LTBR	1108	LTBR	2	0.510883
PSMD3	1109	PSMD3	1	0.510883
ARF1	1110	ARF1	1	0.513338
EIF5	1111	EIF5	2	0.513338
ITGAX	1112	ITGAX	2	0.513338
NHLRC2	1113	NHLRC2	3	0.513338
NUP88	1114	NUP88	2	0.513338
PTPN2	1115	PTPN2	1	0.513338
SERPINA1	1116	SERPINA1	2	0.513338
SF3A1	1117	SF3A1	1	0.513338
TNFSF9	1118	TNFSF9	1	0.513338
CHRNA6	1119	CHRNA6	2	0.515388
DPM1	1120	DPM1	1	0.515388
GHR	1121	GHR	1	0.515388
NPBWR2	1122	NPBWR2	1	0.515388
PIGG	1123	PIGG	1	0.515388
PIGO	1124	PIGO	1	0.515388
POLE2	1125	POLE2	1	0.515388
RABEP1	1126	RABEP1	2	0.515388
EIF2B1	1127	EIF2B1	1	0.517649
MAPK13	1128	MAPK13	1	0.517649
RAD51	1129	RAD51	2	0.517649
SBNO1	1130	SBNO1	3	0.517649
NUDT21	1131	NUDT21	2	0.519857
TRAF5	1132	TRAF5	3	0.519857
ABCC5	1133	ABCC5	6	0.522454
EIF2B3	1134	EIF2B3	1	0.522454
ERBB2IP	1135	ERBB2IP	3	0.522454
INCENP	1136	INCENP	3	0.522454
IRAK1	1137	IRAK1	3	0.522454
LAMB1	1138	LAMB1	2	0.522454
MYCL1	1139	MYCL1	2	0.522454
CDC14A	1140	CDC14A	3	0.525016
CSNK1G3	1141	CSNK1G3	1	0.525016
NEFH	1142	NEFH	12	0.525016
PPP1R3A	1143	PPP1R3A	3	0.525016
SHC2	1144	SHC2	1	0.525016
ABCA2	1145	ABCA2	2	0.52726
ADORA2A	1146	ADORA2A	1	0.52726
EEF1G	1147	EEF1G	1	0.52726
IKBKE	1148	IKBKE	2	0.52726
TNFRSF13B	1149	TNFRSF13B	1	0.52726
XAB2	1150	XAB2	1	0.52726
KCNMA1	1151	KCNMA1	3	0.529539
PCDHGA8	1152	PCDHGA8	3	0.529539
PIGC	1153	PIGC	1	0.529539
PRKAG2	1154	PRKAG2	4	0.529539
RNMT	1155	RNMT	1	0.529539
ARHGAP1	1156	ARHGAP1	1	0.531729
CHERP	1157	CHERP	2	0.531729
COL6A3	1158	COL6A3	4	0.531729
CUL3	1159	CUL3	5	0.531729
HHIP	1160	HHIP	2	0.531729
NOX1	1161	NOX1	2	0.531729
PABPN1	1162	PABPN1	1	0.531729
PGAP1	1163	PGAP1	1	0.531729
SF3A3	1164	SF3A3	1	0.531729
STAG1	1165	STAG1	4	0.531729
ANAPC5	1166	ANAPC5	1	0.534132
CCNT1	1167	CCNT1	1	0.534132
DSG2	1168	DSG2	2	0.534132
GIT1	1169	GIT1	2	0.534132
HEXA	1170	HEXA	3	0.534132
JUP	1171	JUP	1	0.534132
LAMP3	1172	LAMP3	2	0.534132
NARS2	1173	NARS2	4	0.534132
PDE4C	1174	PDE4C	6	0.534132
PDE6B	1175	PDE6B	2	0.536411
PSD3	1176	PSD3	5	0.536411
VPS25	1177	VPS25	2	0.536411
DPP8	1178	DPP8	2	0.539149
GSN	1179	GSN	1	0.539149
SCAMP2	1180	SCAMP2	1	0.539149
SIRT1	1181	SIRT1	3	0.539149
GH2	1182	GH2	1	0.54164
GRSF1	1183	GRSF1	1	0.54164
IFNK	1184	IFNK	1	0.54164
ITGA11	1185	ITGA11	3	0.54164
KIF2B	1186	KIF2B	3	0.54164
ARHGAP20	1187	ARHGAP20	3	0.544184
ATP6V0A4	1188	ATP6V0A4	1	0.544184
CEP135	1189	CEP135	3	0.544184
DNAH2	1190	DNAH2	4	0.544184
ERCC8	1191	ERCC8	1	0.544184
ESR2	1192	ESR2	1	0.544184
GNAI2	1193	GNAI2	1	0.544184
ITGA10	1194	ITGA10	2	0.544184
RGS6	1195	RGS6	2	0.544184
XDH	1196	XDH	2	0.544184
ARHGAP30	1197	ARHGAP30	2	0.547205
CCNT2	1198	CCNT2	1	0.547205
PCDHB6	1199	PCDHB6	2	0.547205
PYGB	1200	PYGB	2	0.547205
SNW1	1201	SNW1	1	0.547205
CARS	1202	CARS	4	0.549961
DLL4	1203	DLL4	2	0.549961
HMHA1	1204	HMHA1	3	0.549961
IL28B	1205	IL28B	2	0.549961
IQGAP3	1206	IQGAP3	3	0.549961
MKNK2	1207	MKNK2	1	0.549961
NCOA4	1208	NCOA4	3	0.549961
SALL1	1209	SALL1	7	0.549961
TRIP10	1210	TRIP10	1	0.549961
YWHAE	1211	YWHAE	1	0.549961
CDK3	1212	CDK3	3	0.55277
CTSE	1213	CTSE	2	0.55277
EEF1A1	1214	EEF1A1	2	0.55277
NCL	1215	NCL	3	0.55277
RASGRP2	1216	RASGRP2	2	0.55277
SAG	1217	SAG	2	0.55277
AMHR2	1218	AMHR2	2	0.555279
C10orf118	1219	C10orf118	5	0.555279
CACNA1A	1220	CACNA1A	1	0.555279
CHEK2	1221	CHEK2	3	0.555279
CYFIP1	1222	CYFIP1	4	0.555279
EIF3J	1223	EIF3J	1	0.555279
GNA15	1224	GNA15	1	0.555279
SREBF1	1225	SREBF1	2	0.555279
CDH16	1226	CDH16	1	0.558211
CKAP5	1227	CKAP5	1	0.558211
EPAS1	1228	EPAS1	3	0.558211
GGA1	1229	GGA1	2	0.558211
GPSM1	1230	GPSM1	3	0.558211
PRIM1	1231	PRIM1	2	0.558211
SPRED1	1232	SPRED1	5	0.558211
TTBK2	1233	TTBK2	4	0.558211
LILRB3	1234	LILRB3	4	0.560614
MMP9	1235	MMP9	1	0.560614
PAPSS1	1236	PAPSS1	3	0.560614
TINF2	1237	TINF2	3	0.560614
BMX	1238	BMX	2	0.563388
CEP164	1239	CEP164	4	0.563388
CLDN2	1240	CLDN2	2	0.563388
KCNJ3	1241	KCNJ3	3	0.563388
THOC3	1242	THOC3	2	0.563388
TNFSF15	1243	TNFSF15	1	0.563388
ARHGEF11	1244	ARHGEF11	3	0.566373
ARPC5L	1245	ARPC5L	1	0.566373
EXOSC10	1246	EXOSC10	3	0.566373
NET1	1247	NET1	2	0.566373
OSMR	1248	OSMR	1	0.566373
ADD1	1249	ADD1	2	0.568847
COL11A2	1250	COL11A2	2	0.568847
DERL2	1251	DERL2	1	0.568847
NCOA3	1252	NCOA3	5	0.568847
RPN2	1253	RPN2	1	0.568847
TACR1	1254	TACR1	1	0.568847
AMN	1255	AMN	3	0.571726
FMN2	1256	FMN2	12	0.571726
PKN2	1257	PKN2	3	0.571726
VCAN	1258	VCAN	4	0.571726
ABCB1	1259	ABCB1	4	0.574959
CDH10	1260	CDH10	1	0.574959
NPR2	1261	NPR2	2	0.574959
PCDHB15	1262	PCDHB15	2	0.574959
PSMB7	1263	PSMB7	1	0.574959
SEMA3D	1264	SEMA3D	3	0.574959
TACR2	1265	TACR2	1	0.574959
WIF1	1266	WIF1	1	0.574959
PCDHB13	1267	PCDHB13	3	0.578122
RGS12	1268	RGS12	2	0.578122
RHOJ	1269	RHOJ	1	0.578122
SKIV2L	1270	SKIV2L	3	0.578122
CXCR6	1271	CXCR6	1	0.581302
EHMT2	1272	EHMT2	3	0.581302
GLI1	1273	GLI1	2	0.581302
MAML1	1274	MAML1	4	0.581302
MARS2	1275	MARS2	3	0.581302
MYC	1276	MYC	1	0.581302
NEDD4L	1277	NEDD4L	1	0.581302
PPP3CA	1278	PPP3CA	1	0.581302
RPS27	1279	RPS27	1	0.581302
STX7	1280	STX7	1	0.581302
TCERG1	1281	TCERG1	2	0.581302
TGIF1	1282	TGIF1	1	0.581302
AP3B2	1283	AP3B2	2	0.584623
ATP1B4	1284	ATP1B4	2	0.584623
CSDA	1285	CSDA	3	0.584623
FNBP4	1286	FNBP4	3	0.584623
GNAT1	1287	GNAT1	1	0.584623
IDH1	1288	IDH1	2	0.584623
IFNA21	1289	IFNA21	1	0.584623
NSD1	1290	NSD1	4	0.584623
SIRPA	1291	SIRPA	4	0.584623
SSR4	1292	SSR4	1	0.584623
CXCL11	1293	CXCL11	1	0.587503
GJA1	1294	GJA1	2	0.587503
GRID1	1295	GRID1	3	0.587503
INSRR	1296	INSRR	4	0.587503
RGS9	1297	RGS9	3	0.587503
STAT4	1298	STAT4	1	0.587503
ABCA5	1299	ABCA5	6	0.590683
ACVR2B	1300	ACVR2B	1	0.590683
CASP7	1301	CASP7	1	0.590683
CDC16	1302	CDC16	2	0.590683
ECHS1	1303	ECHS1	2	0.590683
ECSIT	1304	ECSIT	2	0.590683
NCKAP1L	1305	NCKAP1L	2	0.590683
PACS1	1306	PACS1	2	0.590683
XCL1	1307	XCL1	1	0.590683
ABCG8	1308	ABCG8	2	0.593863
IL15RA	1309	IL15RA	2	0.593863
KPNB1	1310	KPNB1	1	0.593863
MAGI2	1311	MAGI2	4	0.593863
MYCN	1312	MYCN	1	0.593863
PDE4D	1313	PDE4D	1	0.593863
PLXNC1	1314	PLXNC1	2	0.593863
SDC3	1315	SDC3	1	0.593863
BDP1	1316	BDP1	2	0.597113
EPHB4	1317	EPHB4	3	0.597113
IARS	1318	IARS	3	0.597113
PCDHGB1	1319	PCDHGB1	1	0.597113
PCK2	1320	PCK2	1	0.597113
PPARD	1321	PPARD	1	0.597113
STT3A	1322	STT3A	1	0.597113
TAF13	1323	TAF13	1	0.597113
COL2A1	1324	COL2A1	5	0.600117
EPB41L3	1325	EPB41L3	3	0.600117
IKBKAP	1326	IKBKAP	2	0.600117
PLD2	1327	PLD2	1	0.600117
POLH	1328	POLH	4	0.600117
PRKRA	1329	PRKRA	3	0.600117
PTPN12	1330	PTPN12	4	0.600117
PTPRB	1331	PTPRB	3	0.600117
CD3G	1332	CD3G	1	0.603191
LPL	1333	LPL	1	0.603191
PCDH12	1334	PCDH12	1	0.603191
ARHGAP19	1335	ARHGAP19	3	0.606653
BUB3	1336	BUB3	1	0.606653
C5	1337	C5	2	0.606653
DIS3	1338	DIS3	3	0.606653
DNM1	1339	DNM1	1	0.606653
NDUFA13	1340	NDUFA13	2	0.606653
NEDD4	1341	NEDD4	2	0.606653
NFASC	1342	NFASC	4	0.606653
NUF2	1343	NUF2	2	0.606653
SEC31A	1344	SEC31A	2	0.606653
TARS2	1345	TARS2	3	0.606653
ARHGAP25	1346	ARHGAP25	2	0.609816
CCL27	1347	CCL27	1	0.609816
CNTNAP2	1348	CNTNAP2	4	0.609816
MUTYH	1349	MUTYH	2	0.609816
NDUFA10	1350	NDUFA10	2	0.609816
NTN4	1351	NTN4	2	0.609816
PCDHB1	1352	PCDHB1	2	0.609816
PLCD4	1353	PLCD4	3	0.609816
PSMD6	1354	PSMD6	1	0.609816
SLCO1B3	1355	SLCO1B3	3	0.609816
AP2A1	1356	AP2A1	1	0.613296
CACNG5	1357	CACNG5	2	0.613296
CDH6	1358	CDH6	2	0.613296
EPHA1	1359	EPHA1	3	0.613296
EPHB2	1360	EPHB2	1	0.613296
FASN	1361	FASN	2	0.613296
ITGB6	1362	ITGB6	2	0.613296
ITSN1	1363	ITSN1	2	0.613296
SIN3B	1364	SIN3B	1	0.613296
SSH3	1365	SSH3	1	0.613296
ADRA2B	1366	ADRA2B	2	0.616706
CFH	1367	CFH	4	0.616706
CNOT3	1368	CNOT3	2	0.616706
CSNK1A1	1369	CSNK1A1	1	0.616706
DDX20	1370	DDX20	4	0.616706
P2RY6	1371	P2RY6	1	0.616706
RIMS1	1372	RIMS1	5	0.616706
RPS6KB1	1373	RPS6KB1	1	0.616706
SFI1	1374	SFI1	2	0.616706
ANAPC11	1375	ANAPC11	1	0.620062
BIN1	1376	BIN1	3	0.620062
CNR1	1377	CNR1	1	0.620062
COL19A1	1378	COL19A1	3	0.620062
CTSL1	1379	CTSL1	2	0.620062
EOMES	1380	EOMES	2	0.620062
METTL3	1381	METTL3	2	0.620062
MYO1F	1382	MYO1F	4	0.620062
NDUFA4L2	1383	NDUFA4L2	2	0.620062
PLA2G4A	1384	PLA2G4A	1	0.620062
SEC24C	1385	SEC24C	1	0.620062
SLC27A6	1386	SLC27A6	5	0.620062
SLC4A2	1387	SLC4A2	3	0.620062
SMARCD3	1388	SMARCD3	1	0.620062
XRCC4	1389	XRCC4	1	0.620062
ABLIM3	1390	ABLIM3	2	0.623313
AGRN	1391	AGRN	4	0.623313
ARHGAP12	1392	ARHGAP12	2	0.623313
CCR6	1393	CCR6	1	0.623313
CDH12	1394	CDH12	3	0.623313
CREB3L2	1395	CREB3L2	1	0.623313
PRKCSH	1396	PRKCSH	1	0.623313
RAB7A	1397	RAB7A	1	0.623313
RBL2	1398	RBL2	2	0.623313
SMARCD1	1399	SMARCD1	1	0.623313
ABCC9	1400	ABCC9	4	0.626846
IL4	1401	IL4	1	0.626846
PCDH11Y	1402	PCDH11Y	1	0.626846
RAN	1403	RAN	1	0.626846
SARS	1404	SARS	3	0.626846
TLR4	1405	TLR4	2	0.626846
C8G	1406	C8G	1	0.630362
CD6	1407	CD6	2	0.630362
CENPA	1408	CENPA	2	0.630362
CTDP1	1409	CTDP1	2	0.630362
DTX1	1410	DTX1	2	0.630362
MCCC1	1411	MCCC1	2	0.630362
NDE1	1412	NDE1	1	0.630362
NFIB	1413	NFIB	1	0.630362
PARP4	1414	PARP4	4	0.630362
PCDHB8	1415	PCDHB8	2	0.630362
PIK3C3	1416	PIK3C3	1	0.630362
SPRY2	1417	SPRY2	2	0.630362
TAAR2	1418	TAAR2	1	0.630362
ZFYVE16	1419	ZFYVE16	1	0.630362
BCOR	1420	BCOR	3	0.633754
BOC	1421	BOC	5	0.633754
CACNB2	1422	CACNB2	1	0.633754
CDC40	1423	CDC40	1	0.633754
EN1	1424	EN1	1	0.633754
FGF6	1425	FGF6	1	0.633754
NRXN1	1426	NRXN1	4	0.633754
PRKAR2B	1427	PRKAR2B	1	0.633754
SEC24B	1428	SEC24B	1	0.633754
SMO	1429	SMO	3	0.633754
SSH1	1430	SSH1	2	0.633754
TOP1	1431	TOP1	3	0.633754
ADORA2B	1432	ADORA2B	1	0.637428
CTSK	1433	CTSK	1	0.637428
IRAK4	1434	IRAK4	1	0.637428
CHRNB2	1435	CHRNB2	1	0.640538
DDX46	1436	DDX46	2	0.640538
FBXW7	1437	FBXW7	1	0.640538
GMPR	1438	GMPR	1	0.640538
MCM10	1439	MCM10	1	0.640538
MMP1	1440	MMP1	1	0.640538
NDC80	1441	NDC80	2	0.640538
PCDHB10	1442	PCDHB10	2	0.640538
PIK3R4	1443	PIK3R4	3	0.640538
PLAU	1444	PLAU	4	0.640538
SLK	1445	SLK	2	0.640538
AP3S2	1446	AP3S2	1	0.644124
ARID1B	1447	ARID1B	3	0.644124
ASH1L	1448	ASH1L	2	0.644124
CACNG3	1449	CACNG3	2	0.644124
MED1	1450	MED1	1	0.644124
NDUFS3	1451	NDUFS3	1	0.644124
PLA2G12A	1452	PLA2G12A	1	0.644124
RFWD2	1453	RFWD2	2	0.644124
SDCBP	1454	SDCBP	1	0.644124
SH3GLB2	1455	SH3GLB2	1	0.644124
SST	1456	SST	1	0.644124
ABCC6	1457	ABCC6	4	0.647675
CNTN1	1458	CNTN1	2	0.647675
EPN1	1459	EPN1	1	0.647675
IL22	1460	IL22	1	0.647675
ITGAE	1461	ITGAE	3	0.647675
MAP4K4	1462	MAP4K4	1	0.647675
NRXN2	1463	NRXN2	3	0.647675
PENK	1464	PENK	2	0.647675
ACOX1	1465	ACOX1	1	0.651668
AMPD3	1466	AMPD3	3	0.651668
EPHA6	1467	EPHA6	2	0.651668
LATS2	1468	LATS2	5	0.651668
MAFA	1469	MAFA	2	0.651668
NCAN	1470	NCAN	1	0.651668
PEX1	1471	PEX1	3	0.651668
PLXNA3	1472	PLXNA3	2	0.651668
POT1	1473	POT1	2	0.651668
RSPRY1	1474	RSPRY1	3	0.651668
RUVBL2	1475	RUVBL2	2	0.651668
CDH5	1476	CDH5	1	0.655201
CDH7	1477	CDH7	3	0.655201
GLS2	1478	GLS2	2	0.655201
GPR83	1479	GPR83	1	0.655201
IL23R	1480	IL23R	1	0.655201
ITK	1481	ITK	1	0.655201
LATS1	1482	LATS1	2	0.655201
PCDH1	1483	PCDH1	3	0.655201
SEMA3A	1484	SEMA3A	2	0.655201
SH3GL1	1485	SH3GL1	1	0.655201
WHSC1L1	1486	WHSC1L1	5	0.655201
ACTR2	1487	ACTR2	1	0.658664
CDH26	1488	CDH26	1	0.658664
CDK2	1489	CDK2	2	0.658664
CORO1A	1490	CORO1A	2	0.658664
GGA2	1491	GGA2	1	0.658664
GPC3	1492	GPC3	1	0.658664
HNRNPU	1493	HNRNPU	1	0.658664
ITGA2	1494	ITGA2	1	0.658664
KLRC1	1495	KLRC1	2	0.658664
LMNB1	1496	LMNB1	1	0.658664
NCF1	1497	NCF1	1	0.658664
NFATC2	1498	NFATC2	1	0.658664
PCDH18	1499	PCDH18	2	0.658664
PREB	1500	PREB	1	0.658664
SNAPC4	1501	SNAPC4	1	0.658664
SYDE1	1502	SYDE1	2	0.658664
CCM2	1503	CCM2	2	0.66225
DAPK1	1504	DAPK1	2	0.66225
DPYSL2	1505	DPYSL2	2	0.66225
ERCC5	1506	ERCC5	2	0.66225
NKTR	1507	NKTR	2	0.66225
PODXL	1508	PODXL	5	0.66225
SMG6	1509	SMG6	4	0.66225
SP8	1510	SP8	3	0.66225
SSNA1	1511	SSNA1	1	0.66225
THOC1	1512	THOC1	1	0.66225
XRN1	1513	XRN1	2	0.66225
CELSR3	1514	CELSR3	2	0.666013
CEP152	1515	CEP152	3	0.666013
KIF23	1516	KIF23	1	0.666013
PRPS2	1517	PRPS2	2	0.666013
RBM39	1518	RBM39	4	0.666013
RQCD1	1519	RQCD1	2	0.666013
SDHD	1520	SDHD	1	0.666013
SETDB1	1521	SETDB1	4	0.666013
TNFSF14	1522	TNFSF14	2	0.666013
UBQLN1	1523	UBQLN1	1	0.666013
ABCA8	1524	ABCA8	3	0.669387
CDC5L	1525	CDC5L	1	0.669387
DNAJC1	1526	DNAJC1	1	0.669387
EPHA5	1527	EPHA5	3	0.669387
GUCY1A2	1528	GUCY1A2	1	0.669387
HLA-C	1529	HLA-C	2	0.669387
IL17RA	1530	IL17RA	1	0.669387
NEDD1	1531	NEDD1	2	0.669387
PRPF19	1532	PRPF19	1	0.669387
RANBP10	1533	RANBP10	2	0.669387
RIF1	1534	RIF1	2	0.669387
XPC	1535	XPC	4	0.669387
ABLIM1	1536	ABLIM1	3	0.673433
CNGB1	1537	CNGB1	2	0.673433
EDC4	1538	EDC4	2	0.673433
FGF20	1539	FGF20	1	0.673433
MYH15	1540	MYH15	2	0.673433
NKX2-2	1541	NKX2-2	3	0.673433
PTPRK	1542	PTPRK	2	0.673433
RAB22A	1543	RAB22A	1	0.673433
SCARB1	1544	SCARB1	2	0.673433
SNX13	1545	SNX13	2	0.673433
TLE3	1546	TLE3	2	0.673433
YOD1	1547	YOD1	1	0.673433
EPHA3	1548	EPHA3	2	0.677337
GIT2	1549	GIT2	1	0.677337
MAGI1	1550	MAGI1	2	0.677337
PSMB4	1551	PSMB4	1	0.677337
SEC23B	1552	SEC23B	1	0.677337
TLR5	1553	TLR5	2	0.677337
UBQLNL	1554	UBQLNL	1	0.677337
ABCD3	1555	ABCD3	2	0.681206
ACE	1556	ACE	2	0.681206
B2M	1557	B2M	1	0.681206
BCAS2	1558	BCAS2	2	0.681206
COL4A3	1559	COL4A3	4	0.681206
COPE	1560	COPE	1	0.681206
EDEM3	1561	EDEM3	1	0.681206
GTF3C5	1562	GTF3C5	2	0.681206
IDE	1563	IDE	2	0.681206
KIAA0907	1564	KIAA0907	2	0.681206
MARS	1565	MARS	2	0.681206
PIAS2	1566	PIAS2	1	0.681206
PVRL2	1567	PVRL2	2	0.681206
TXNL4A	1568	TXNL4A	1	0.681206
UQCRC2	1569	UQCRC2	1	0.681206
USP8	1570	USP8	1	0.681206
AIRE	1571	AIRE	1	0.684987
BCAP31	1572	BCAP31	1	0.684987
CD3E	1573	CD3E	1	0.684987
CENPJ	1574	CENPJ	2	0.684987
CIITA	1575	CIITA	2	0.684987
CNOT6	1576	CNOT6	2	0.684987
DHX15	1577	DHX15	2	0.684987
DIAPH1	1578	DIAPH1	1	0.684987
FCAR	1579	FCAR	2	0.684987
GTF3C2	1580	GTF3C2	2	0.684987
IQSEC2	1581	IQSEC2	1	0.684987
RICTOR	1582	RICTOR	3	0.684987
STX1A	1583	STX1A	1	0.684987
SYDE2	1584	SYDE2	2	0.684987
C1QA	1585	C1QA	1	0.688909
C2	1586	C2	1	0.688909
HTR2A	1587	HTR2A	1	0.688909
NCOA6	1588	NCOA6	2	0.688909
NPLOC4	1589	NPLOC4	1	0.688909
PLAT	1590	PLAT	2	0.688909
PTRF	1591	PTRF	1	0.688909
RFC4	1592	RFC4	1	0.688909
RRBP1	1593	RRBP1	1	0.688909
SRP68	1594	SRP68	2	0.688909
TRIM3	1595	TRIM3	2	0.688909
UBE4A	1596	UBE4A	1	0.688909
UGT2B7	1597	UGT2B7	2	0.688909
UNC5D	1598	UNC5D	2	0.688909
APOA5	1599	APOA5	2	0.692902
ARHGAP29	1600	ARHGAP29	2	0.692902
CNOT2	1601	CNOT2	2	0.692902
HDAC10	1602	HDAC10	3	0.692902
HDAC9	1603	HDAC9	2	0.692902
HIST1H2BO	1604	HIST1H2BO	1	0.692902
LMAN1	1605	LMAN1	1	0.692902
MSR1	1606	MSR1	6	0.692902
MYO5A	1607	MYO5A	2	0.692902
NDUFS2	1608	NDUFS2	1	0.692902
NPR1	1609	NPR1	3	0.692902
PCDHB11	1610	PCDHB11	4	0.692902
PPP1R15A	1611	PPP1R15A	2	0.692902
RAD52	1612	RAD52	2	0.692902
UBE2E2	1613	UBE2E2	1	0.692902
ABL2	1614	ABL2	2	0.697036
ARHGAP6	1615	ARHGAP6	1	0.697036
CNTNAP1	1616	CNTNAP1	5	0.697036
CSPG4	1617	CSPG4	4	0.697036
CUL2	1618	CUL2	1	0.697036
HIF1A	1619	HIF1A	3	0.697036
MAGED1	1620	MAGED1	3	0.697036
PCSK1	1621	PCSK1	1	0.697036
PYGM	1622	PYGM	2	0.697036
STAMBP	1623	STAMBP	2	0.697036
THBS2	1624	THBS2	1	0.697036
TRA2A	1625	TRA2A	1	0.697036
U2AF2	1626	U2AF2	1	0.697036
ARHGAP28	1627	ARHGAP28	3	0.700675
CD1D	1628	CD1D	3	0.700675
CDH24	1629	CDH24	2	0.700675
CLDN7	1630	CLDN7	1	0.700675
DNAJB11	1631	DNAJB11	1	0.700675
DNAJB1	1632	DNAJB1	3	0.700675
HNRNPR	1633	HNRNPR	1	0.700675
LIG4	1634	LIG4	1	0.700675
MYO1E	1635	MYO1E	4	0.700675
NFIX	1636	NFIX	2	0.700675
PFKFB3	1637	PFKFB3	1	0.700675
SLC17A5	1638	SLC17A5	1	0.700675
WNT11	1639	WNT11	2	0.700675
ATP2B4	1640	ATP2B4	1	0.704279
BCAT1	1641	BCAT1	1	0.704279
CD38	1642	CD38	1	0.704279
CNOT4	1643	CNOT4	2	0.704279
EPRS	1644	EPRS	2	0.704279
MAML2	1645	MAML2	2	0.704279
PDE6C	1646	PDE6C	2	0.704279
RNF25	1647	RNF25	3	0.704279
RPA3	1648	RPA3	1	0.704279
SH3GLB1	1649	SH3GLB1	1	0.704279
SLC30A6	1650	SLC30A6	1	0.704279
AMICA1	1651	AMICA1	3	0.708589
ARHGAP22	1652	ARHGAP22	2	0.708589
BRF2	1653	BRF2	1	0.708589
COL18A1	1654	COL18A1	1	0.708589
ECT2	1655	ECT2	2	0.708589
HIST2H2AB	1656	HIST2H2AB	1	0.708589
KIF14	1657	KIF14	6	0.708589
MBL2	1658	MBL2	1	0.708589
NDUFA3	1659	NDUFA3	1	0.708589
RPS29	1660	RPS29	1	0.708589
TARS	1661	TARS	2	0.708589
TAS2R38	1662	TAS2R38	3	0.708589
UBTF	1663	UBTF	1	0.708589
WDR52	1664	WDR52	7	0.708589
ZEB1	1665	ZEB1	3	0.708589
CD34	1666	CD34	1	0.713041
CTSW	1667	CTSW	1	0.713041
ERC1	1668	ERC1	1	0.713041
FGF13	1669	FGF13	1	0.713041
HADHB	1670	HADHB	2	0.713041
RAB5A	1671	RAB5A	1	0.713041
TUBGCP3	1672	TUBGCP3	3	0.713041
ACP5	1673	ACP5	2	0.717317
AURKB	1674	AURKB	1	0.717317
DNAJC5G	1675	DNAJC5G	1	0.717317
DSC2	1676	DSC2	3	0.717317
FGF14	1677	FGF14	1	0.717317
HIST1H2AH	1678	HIST1H2AH	1	0.717317
HIST1H2BJ	1679	HIST1H2BJ	1	0.717317
MAN2C1	1680	MAN2C1	5	0.717317
NUMB	1681	NUMB	2	0.717317
PEX3	1682	PEX3	2	0.717317
PTPN5	1683	PTPN5	2	0.717317
RPL22L1	1684	RPL22L1	1	0.717317
SAP30	1685	SAP30	1	0.717317
ABCA10	1686	ABCA10	4	0.721733
CXADR	1687	CXADR	1	0.721733
GAA	1688	GAA	1	0.721733
GSTO1	1689	GSTO1	1	0.721733
IARS2	1690	IARS2	2	0.721733
MYO16	1691	MYO16	5	0.721733
STX4	1692	STX4	1	0.721733
TNFSF8	1693	TNFSF8	1	0.721733
ACP2	1694	ACP2	1	0.725691
ALLC	1695	ALLC	2	0.725691
ARHGAP17	1696	ARHGAP17	2	0.725691
CCT7	1697	CCT7	1	0.725691
CD22	1698	CD22	1	0.725691
CD44	1699	CD44	1	0.725691
ESAM	1700	ESAM	1	0.725691
H2AFJ	1701	H2AFJ	1	0.725691
NCAM2	1702	NCAM2	2	0.725691
PLCG2	1703	PLCG2	1	0.725691
PPP2R1B	1704	PPP2R1B	1	0.725691
RAB11FIP2	1705	RAB11FIP2	2	0.725691
RBM17	1706	RBM17	1	0.725691
SEMA3E	1707	SEMA3E	2	0.725691
SIL1	1708	SIL1	1	0.725691
TIE1	1709	TIE1	2	0.725691
TP63	1710	TP63	2	0.725691
BMP2	1711	BMP2	1	0.729772
C19orf53	1712	C19orf53	1	0.729772
CKAP4	1713	CKAP4	1	0.729772
CUBN	1714	CUBN	3	0.729772
F8	1715	F8	2	0.729772
GALC	1716	GALC	1	0.729772
ITGB3	1717	ITGB3	1	0.729772
LARS	1718	LARS	3	0.729772
NUP210	1719	NUP210	1	0.729772
PSMB5	1720	PSMB5	1	0.729772
SLC16A7	1721	SLC16A7	2	0.729772
TAF7L	1722	TAF7L	4	0.729772
TSC1	1723	TSC1	2	0.729772
TUBGCP5	1724	TUBGCP5	2	0.729772
AGT	1725	AGT	1	0.734047
CHMP2B	1726	CHMP2B	1	0.734047
DIAPH3	1727	DIAPH3	3	0.734047
DLG4	1728	DLG4	1	0.734047
HIST1H3J	1729	HIST1H3J	1	0.734047
IL18R1	1730	IL18R1	1	0.734047
IL22RA1	1731	IL22RA1	1	0.734047
KEAP1	1732	KEAP1	2	0.734047
NEB	1733	NEB	6	0.734047
NRCAM	1734	NRCAM	3	0.734047
RHOT2	1735	RHOT2	2	0.734047
SLC9A4	1736	SLC9A4	3	0.734047
STXBP3	1737	STXBP3	3	0.734047
TOP2A	1738	TOP2A	3	0.734047
UBE3C	1739	UBE3C	4	0.734047
ATP6V0D2	1740	ATP6V0D2	1	0.738358
BMP5	1741	BMP5	1	0.738358
CARS2	1742	CARS2	2	0.738358
CTCF	1743	CTCF	2	0.738358
HSPBP1	1744	HSPBP1	1	0.738358
LCAT	1745	LCAT	1	0.738358
LRP6	1746	LRP6	2	0.738358
MME	1747	MME	2	0.738358
MPG	1748	MPG	1	0.738358
PDE4B	1749	PDE4B	2	0.738358
RAPGEF1	1750	RAPGEF1	2	0.738358
SLC7A11	1751	SLC7A11	2	0.738358
ABCA12	1752	ABCA12	3	0.742792
AQP7	1753	AQP7	4	0.742792
CHMP1B	1754	CHMP1B	3	0.742792
CTNS	1755	CTNS	1	0.742792
DEPDC1B	1756	DEPDC1B	2	0.742792
MKI67	1757	MKI67	4	0.742792
NR2C2	1758	NR2C2	1	0.742792
NR5A2	1759	NR5A2	2	0.742792
PDGFRB	1760	PDGFRB	1	0.742792
PILRB	1761	PILRB	2	0.742792
RPL10A	1762	RPL10A	1	0.742792
RPL22	1763	RPL22	2	0.742792
SCIN	1764	SCIN	1	0.742792
WNT7B	1765	WNT7B	1	0.742792
ABCA3	1766	ABCA3	3	0.747191
ABCB5	1767	ABCB5	3	0.747191
APH1B	1768	APH1B	1	0.747191
ARHGDIB	1769	ARHGDIB	1	0.747191
ARNT2	1770	ARNT2	2	0.747191
CD209	1771	CD209	2	0.747191
CDT1	1772	CDT1	1	0.747191
CENPH	1773	CENPH	3	0.747191
COX6B2	1774	COX6B2	1	0.747191
CTSA	1775	CTSA	1	0.747191
GRK5	1776	GRK5	1	0.747191
KLHL17	1777	KLHL17	2	0.747191
LSP1	1778	LSP1	2	0.747191
MAF	1779	MAF	1	0.747191
MUC5B	1780	MUC5B	2	0.747191
NCAPH	1781	NCAPH	2	0.747191
NRF1	1782	NRF1	1	0.747191
SCNN1B	1783	SCNN1B	2	0.747191
SPC25	1784	SPC25	1	0.747191
TP53I3	1785	TP53I3	2	0.747191
TPP1	1786	TPP1	1	0.747191
TRIM24	1787	TRIM24	2	0.747191
COL17A1	1788	COL17A1	3	0.751767
COX7A2	1789	COX7A2	1	0.751767
DNASE2B	1790	DNASE2B	1	0.751767
GABRB3	1791	GABRB3	1	0.751767
HIST1H2AJ	1792	HIST1H2AJ	1	0.751767
KLHL13	1793	KLHL13	1	0.751767
LIG1	1794	LIG1	1	0.751767
NR4A1	1795	NR4A1	1	0.751767
NSMAF	1796	NSMAF	3	0.751767
PARS2	1797	PARS2	2	0.751767
PDE11A	1798	PDE11A	3	0.751767
PIF1	1799	PIF1	2	0.751767
PSMC6	1800	PSMC6	1	0.751767
RB1	1801	RB1	1	0.751767
SLC11A1	1802	SLC11A1	1	0.751767
SNAP23	1803	SNAP23	1	0.751767
ARHGAP11A	1804	ARHGAP11A	2	0.756289
BMP1	1805	BMP1	2	0.756289
CLDN18	1806	CLDN18	1	0.756289
COL14A1	1807	COL14A1	1	0.756289
ERCC1	1808	ERCC1	1	0.756289
F12	1809	F12	3	0.756289
FHL2	1810	FHL2	1	0.756289
GSK3A	1811	GSK3A	2	0.756289
HIST1H2AK	1812	HIST1H2AK	1	0.756289
IFNA14	1813	IFNA14	1	0.756289
MCOLN1	1814	MCOLN1	1	0.756289
MMP8	1815	MMP8	2	0.756289
RAC3	1816	RAC3	1	0.756289
RXRG	1817	RXRG	2	0.756289
SGCA	1818	SGCA	2	0.756289
SLC8A2	1819	SLC8A2	2	0.756289
TNFRSF4	1820	TNFRSF4	1	0.756289
AP3M2	1821	AP3M2	1	0.761395
AP4E1	1822	AP4E1	3	0.761395
CASK	1823	CASK	1	0.761395
EPHX1	1824	EPHX1	4	0.761395
FBP1	1825	FBP1	1	0.761395
ITGA5	1826	ITGA5	1	0.761395
JAG2	1827	JAG2	2	0.761395
MED17	1828	MED17	3	0.761395
ONECUT1	1829	ONECUT1	3	0.761395
PLXNB1	1830	PLXNB1	2	0.761395
RC3H2	1831	RC3H2	2	0.761395
RDBP	1832	RDBP	1	0.761395
RPL11	1833	RPL11	1	0.761395
RPL26L1	1834	RPL26L1	1	0.761395
TCF7L2	1835	TCF7L2	1	0.761395
UNC5C	1836	UNC5C	1	0.761395
VARS	1837	VARS	2	0.761395
ACSL3	1838	ACSL3	1	0.766377
AGA	1839	AGA	1	0.766377
ARHGDIG	1840	ARHGDIG	1	0.766377
CADM3	1841	CADM3	1	0.766377
CSNK2B	1842	CSNK2B	1	0.766377
CTSH	1843	CTSH	1	0.766377
HIPK3	1844	HIPK3	1	0.766377
HIST1H3H	1845	HIST1H3H	1	0.766377
HTR2C	1846	HTR2C	1	0.766377
IL17RB	1847	IL17RB	1	0.766377
PDE4A	1848	PDE4A	2	0.766377
PSAPL1	1849	PSAPL1	1	0.766377
RBBP5	1850	RBBP5	3	0.766377
TEC	1851	TEC	5	0.766377
ULK3	1852	ULK3	3	0.766377
ACSL4	1853	ACSL4	1	0.771483
ARHGAP9	1854	ARHGAP9	1	0.771483
CSTF3	1855	CSTF3	3	0.771483
EIF4G3	1856	EIF4G3	3	0.771483
EIF4H	1857	EIF4H	1	0.771483
GUCY2F	1858	GUCY2F	2	0.771483
HIST1H4E	1859	HIST1H4E	1	0.771483
IL16	1860	IL16	4	0.771483
ITGA9	1861	ITGA9	1	0.771483
LINGO1	1862	LINGO1	3	0.771483
MED12	1863	MED12	4	0.771483
NEU1	1864	NEU1	1	0.771483
PDE6A	1865	PDE6A	1	0.771483
PIGP	1866	PIGP	1	0.771483
STRN	1867	STRN	1	0.771483
TRIM21	1868	TRIM21	1	0.771483
TRPC4AP	1869	TRPC4AP	2	0.771483
ABCC10	1870	ABCC10	3	0.776518
ABCD2	1871	ABCD2	1	0.776518
ACD	1872	ACD	2	0.776518
APBB2	1873	APBB2	2	0.776518
ASAH1	1874	ASAH1	1	0.776518
ATP2B3	1875	ATP2B3	1	0.776518
CAPN9	1876	CAPN9	2	0.776518
CD96	1877	CD96	1	0.776518
CENPT	1878	CENPT	1	0.776518
CHD8	1879	CHD8	2	0.776518
CNTN2	1880	CNTN2	1	0.776518
COL9A2	1881	COL9A2	3	0.776518
GATAD2A	1882	GATAD2A	2	0.776518
MGAT5	1883	MGAT5	2	0.776518
MPV17L	1884	MPV17L	2	0.776518
MYO10	1885	MYO10	5	0.776518
NCF2	1886	NCF2	1	0.776518
PSMC1	1887	PSMC1	1	0.776518
REC8	1888	REC8	2	0.776518
AHSA2	1889	AHSA2	1	0.781535
AP3S1	1890	AP3S1	2	0.781535
CFLAR	1891	CFLAR	1	0.781535
DAB2	1892	DAB2	1	0.781535
DLST	1893	DLST	1	0.781535
FES	1894	FES	1	0.781535
IL28A	1895	IL28A	1	0.781535
LNPEP	1896	LNPEP	3	0.781535
PLOD2	1897	PLOD2	4	0.781535
PRDM4	1898	PRDM4	3	0.781535
SLC11A2	1899	SLC11A2	1	0.781535
SMUG1	1900	SMUG1	1	0.781535
STK24	1901	STK24	1	0.781535
UGT2A3	1902	UGT2A3	2	0.781535
ARPC2	1903	ARPC2	1	0.787524
CASP1	1904	CASP1	1	0.787524
CCT8	1905	CCT8	1	0.787524
CEP70	1906	CEP70	1	0.787524
DSG1	1907	DSG1	3	0.787524
FBXO5	1908	FBXO5	1	0.787524
GGT1	1909	GGT1	2	0.787524
HIST2H2BE	1910	HIST2H2BE	1	0.787524
HMGCS2	1911	HMGCS2	1	0.787524
MAPK8IP1	1912	MAPK8IP1	2	0.787524
MED24	1913	MED24	2	0.787524
PER1	1914	PER1	4	0.787524
PIPOX	1915	PIPOX	1	0.787524
RCC2	1916	RCC2	2	0.787524
SLC10A2	1917	SLC10A2	1	0.787524
TANK	1918	TANK	1	0.787524
TDG	1919	TDG	1	0.787524
ABCC1	1920	ABCC1	2	0.793318
ATP4A	1921	ATP4A	3	0.793318
AURKAIP1	1922	AURKAIP1	1	0.793318
CDKL5	1923	CDKL5	3	0.793318
CR2	1924	CR2	1	0.793318
DAAM1	1925	DAAM1	2	0.793318
DCN	1926	DCN	3	0.793318
GPX6	1927	GPX6	1	0.793318
IL1R1	1928	IL1R1	1	0.793318
MAN2A1	1929	MAN2A1	2	0.793318
MIS12	1930	MIS12	1	0.793318
MYL9	1931	MYL9	1	0.793318
RPA2	1932	RPA2	1	0.793318
SEMA4B	1933	SEMA4B	1	0.793318
TAS1R3	1934	TAS1R3	2	0.793318
UBE2A	1935	UBE2A	2	0.793318
ABP1	1936	ABP1	5	0.799413
COL4A2	1937	COL4A2	1	0.799413
COL4A6	1938	COL4A6	4	0.799413
EFNA3	1939	EFNA3	1	0.799413
EHD1	1940	EHD1	1	0.799413
GNG11	1941	GNG11	1	0.799413
GNS	1942	GNS	1	0.799413
H2AFZ	1943	H2AFZ	1	0.799413
HSPA4	1944	HSPA4	2	0.799413
HTR6	1945	HTR6	1	0.799413
LRP5	1946	LRP5	2	0.799413
MAP4K1	1947	MAP4K1	1	0.799413
MBD4	1948	MBD4	2	0.799413
MTSS1	1949	MTSS1	3	0.799413
MYO6	1950	MYO6	2	0.799413
NKD2	1951	NKD2	1	0.799413
PFKM	1952	PFKM	2	0.799413
SEMA6D	1953	SEMA6D	2	0.799413
SLC16A3	1954	SLC16A3	1	0.799413
SYK	1955	SYK	1	0.799413
TRIM37	1956	TRIM37	1	0.799413
AVIL	1957	AVIL	6	0.805243
C4BPA	1958	C4BPA	2	0.805243
CEP76	1959	CEP76	1	0.805243
COPB2	1960	COPB2	3	0.805243
FECH	1961	FECH	2	0.805243
GIMAP8	1962	GIMAP8	3	0.805243
GMIP	1963	GMIP	1	0.805243
INHBB	1964	INHBB	1	0.805243
LSM1	1965	LSM1	1	0.805243
NUMA1	1966	NUMA1	2	0.805243
PPARG	1967	PPARG	1	0.805243
PSENEN	1968	PSENEN	1	0.805243
PTOV1	1969	PTOV1	2	0.805243
SERINC5	1970	SERINC5	2	0.805243
SERPINB13	1971	SERPINB13	4	0.805243
SGCD	1972	SGCD	1	0.805243
SIRT6	1973	SIRT6	1	0.805243
SKIL	1974	SKIL	1	0.805243
AMY2B	1975	AMY2B	1	0.810861
ATG3	1976	ATG3	2	0.810861
CD93	1977	CD93	2	0.810861
FGA	1978	FGA	1	0.810861
GALNS	1979	GALNS	2	0.810861
GEMIN4	1980	GEMIN4	2	0.810861
HSPD1	1981	HSPD1	2	0.810861
LENG8	1982	LENG8	1	0.810861
MAD2L1	1983	MAD2L1	1	0.810861
OGT	1984	OGT	4	0.810861
PPP1R13L	1985	PPP1R13L	1	0.810861
PTGIR	1986	PTGIR	1	0.810861
RAB5B	1987	RAB5B	1	0.810861
RGMA	1988	RGMA	1	0.810861
SDHA	1989	SDHA	1	0.810861
SHARPIN	1990	SHARPIN	2	0.810861
SRP72	1991	SRP72	2	0.810861
TAS2R3	1992	TAS2R3	2	0.810861
TMC8	1993	TMC8	2	0.810861
TUBAL3	1994	TUBAL3	2	0.810861
UBE2O	1995	UBE2O	2	0.810861
WT1	1996	WT1	3	0.810861
WWP2	1997	WWP2	2	0.810861
ABR	1998	ABR	1	0.81678
[truncated: 270 more rows]

## Sheet: THCA
Table S4 The results of THCA
	rank	gene	mut	p-value
BRAF	1	BRAF	247	0
NRAS	2	NRAS	31	8.81e-05
HRAS	3	HRAS	14	0.000176111
PTPN11	4	PTPN11	11	0.000726456
PTEN	5	PTEN	6	0.00200326
CDC27	6	CDC27	22	0.00310395
H6PD	7	H6PD	6	0.00347818
POLR3A	8	POLR3A	5	0.00361027
UGT1A6	9	UGT1A6	5	0.0052613
CYP11B1	10	CYP11B1	5	0.00530533
KRAS	11	KRAS	4	0.00534936
AGPAT2	12	AGPAT2	5	0.00587769
PLCB1	13	PLCB1	3	0.00640602
PIGQ	14	PIGQ	4	0.00642804
PIK3CA	15	PIK3CA	4	0.00695637
PML	16	PML	8	0.00803505
GOT2	17	GOT2	4	0.00913574
EP300	18	EP300	3	0.0101484
CSGALNACT2	19	CSGALNACT2	5	0.0104566
PRKACA	20	PRKACA	2	0.0109629
NUP214	21	NUP214	6	0.0119095
COX4I1	22	COX4I1	4	0.0121957
PLCB3	23	PLCB3	3	0.01279
PTK2	24	PTK2	3	0.0178092
PDHX	25	PDHX	5	0.0180513
ENO3	26	ENO3	3	0.0183595
RB1	27	RB1	6	0.0189539
SUCLA2	28	SUCLA2	3	0.0201647
CAMK2G	29	CAMK2G	5	0.0202747
AKT1	30	AKT1	3	0.0202967
GALT	31	GALT	4	0.0202967
GALNT14	32	GALNT14	3	0.0203188
ADPGK	33	ADPGK	3	0.0210012
DNMT3A	34	DNMT3A	4	0.0212654
WBSCR17	35	WBSCR17	3	0.0216396
AKR1D1	36	AKR1D1	3	0.0218817
ATM	37	ATM	5	0.022278
MAPK9	38	MAPK9	3	0.023951
GNAQ	39	GNAQ	3	0.0240611
AVPR2	40	AVPR2	6	0.0242812
CYC1	41	CYC1	4	0.0248096
GRIN2B	42	GRIN2B	5	0.0248316
CTNNB1	43	CTNNB1	4	0.0284639
ITPR2	44	ITPR2	4	0.0297847
SDHA	45	SDHA	2	0.0323603
ITGAL	46	ITGAL	6	0.033395
HNRNPC	47	HNRNPC	6	0.0337472
STT3A	48	STT3A	2	0.0339453
CAMK2A	49	CAMK2A	3	0.0344296
HLA-DRB5	50	HLA-DRB5	6	0.0347818
PRKG1	51	PRKG1	3	0.035068
GPR50	52	GPR50	9	0.0351341
CD38	53	CD38	3	0.0352661
LDHA	54	LDHA	2	0.0355523
PIK3C2A	55	PIK3C2A	2	0.036587
CYP2A13	56	CYP2A13	2	0.036653
PLCE1	57	PLCE1	3	0.0374895
EPRS	58	EPRS	2	0.0378638
ANPEP	59	ANPEP	2	0.0379298
BRCA1	60	BRCA1	6	0.0384361
UGT1A3	61	UGT1A3	4	0.0386563
CYP11A1	62	CYP11A1	2	0.0387443
SARDH	63	SARDH	5	0.0387663
EHHADH	64	EHHADH	2	0.0390085
UGT2B28	65	UGT2B28	2	0.0390525
MGAM	66	MGAM	2	0.0390966
ADH7	67	ADH7	2	0.0401972
PAK2	68	PAK2	3	0.0403073
NDUFA6	69	NDUFA6	3	0.0403954
PLA2G7	70	PLA2G7	2	0.0404614
TK1	71	TK1	2	0.0405275
ACSM1	72	ACSM1	3	0.0405275
PSPH	73	PSPH	2	0.0405275
EXT1	74	EXT1	3	0.0408797
MGAT5B	75	MGAT5B	3	0.041408
ADH4	76	ADH4	2	0.041452
ALOX15	77	ALOX15	3	0.0415621
MTMR6	78	MTMR6	3	0.0428389
CS	79	CS	2	0.043037
OGDHL	80	OGDHL	2	0.0433892
UGT2B7	81	UGT2B7	3	0.0435654
CES1	82	CES1	2	0.0436754
GNAS	83	GNAS	2	0.0437195
ALOX12	84	ALOX12	4	0.0440717
HPSE2	85	HPSE2	3	0.0444019
DGKI	86	DGKI	2	0.044644
NANS	87	NANS	3	0.0458768
CCNE1	88	CCNE1	3	0.0467794
NADSYN1	89	NADSYN1	2	0.04777
TUBB3	90	TUBB3	6	0.0491128
TNF	91	TNF	1	0.0508519
PLCG1	92	PLCG1	2	0.050962
CTNNA3	93	CTNNA3	6	0.0572359
MAPK10	94	MAPK10	2	0.0631577
ITGB1	95	ITGB1	2	0.0649848
CASP3	96	CASP3	1	0.065337
ARRB2	97	ARRB2	2	0.0656452
JAK2	98	JAK2	2	0.0663277
NUP133	99	NUP133	4	0.0671202
HLA-DRB1	100	HLA-DRB1	4	0.0674283
CCNT1	101	CCNT1	3	0.0687932
PRKACG	102	PRKACG	2	0.0688372
FZD6	103	FZD6	3	0.0699379
POLR1A	104	POLR1A	2	0.070048
STT3B	105	STT3B	1	0.0703562
TAF1	106	TAF1	3	0.0724035
HLA-A	107	HLA-A	5	0.073218
LMTK2	108	LMTK2	5	0.0735482
PIK3R1	109	PIK3R1	2	0.0750231
CD40LG	110	CD40LG	2	0.0752433
MAPT	111	MAPT	5	0.0755955
GNAL	112	GNAL	2	0.0763439
SMARCA4	113	SMARCA4	5	0.0765641
HSD17B4	114	HSD17B4	3	0.0769603
TP53	115	TP53	3	0.0777308
GBF1	116	GBF1	5	0.0778849
MAT1A	117	MAT1A	5	0.0795359
PIGO	118	PIGO	2	0.0803725
ARHGAP5	119	ARHGAP5	6	0.081275
PIK3CB	120	PIK3CB	1	0.081275
RASA1	121	RASA1	2	0.081275
AKT2	122	AKT2	2	0.0838507
POLE2	123	POLE2	1	0.0841368
NEDD4	124	NEDD4	5	0.0857659
DGKA	125	DGKA	1	0.0867345
AP3M1	126	AP3M1	5	0.0885176
MAPK12	127	MAPK12	2	0.0886937
ALDOB	128	ALDOB	2	0.0888918
HSPA8	129	HSPA8	2	0.0892661
NDUFA10	130	NDUFA10	2	0.0895302
HK3	131	HK3	1	0.0900586
UQCRC1	132	UQCRC1	2	0.0903888
GOT1	133	GOT1	3	0.0910052
ACTB	134	ACTB	1	0.0911372
PFKP	135	PFKP	2	0.0917536
ACSL3	136	ACSL3	2	0.0920178
CYP2C9	137	CYP2C9	3	0.0943292
GNS	138	GNS	2	0.0943292
HADHA	139	HADHA	2	0.0943292
HEXB	140	HEXB	1	0.0947035
NOS1	141	NOS1	1	0.0950777
NFATC1	142	NFATC1	3	0.0954519
POLA2	143	POLA2	1	0.0956501
UGT1A8	144	UGT1A8	4	0.0956501
CACNA1A	145	CACNA1A	4	0.0961784
PAPSS1	146	PAPSS1	2	0.0962885
PRSS3	147	PRSS3	5	0.0970149
POLR1B	148	POLR1B	1	0.0976093
DCT	149	DCT	2	0.0981156
ACADS	150	ACADS	2	0.0981817
ATP6V1C1	151	ATP6V1C1	2	0.0983358
OCRL	152	OCRL	1	0.0988861
POLR3B	153	POLR3B	1	0.0998107
CHEK2	154	CHEK2	7	0.100207
COX7B	155	COX7B	1	0.101616
PI4KA	156	PI4KA	1	0.101814
ENPP1	157	ENPP1	1	0.101968
DGKB	158	DGKB	1	0.1021
EARS2	159	EARS2	1	0.1021
EPHX2	160	EPHX2	1	0.102232
ITPR1	161	ITPR1	2	0.102232
TCIRG1	162	TCIRG1	1	0.102232
CYP27B1	163	CYP27B1	1	0.10265
NT5C1B	164	NT5C1B	2	0.103597
POLR3D	165	POLR3D	1	0.104147
AMPD2	166	AMPD2	2	0.104698
DNMT1	167	DNMT1	4	0.10483
DPYS	168	DPYS	3	0.10483
HEXA	169	HEXA	1	0.105248
FLT1	170	FLT1	2	0.105909
PRPS1	171	PRPS1	1	0.106525
ATP6AP1	172	ATP6AP1	1	0.106811
PLA2G3	173	PLA2G3	1	0.106811
DBT	174	DBT	1	0.107516
PPT2	175	PPT2	1	0.108044
CBR1	176	CBR1	2	0.109101
UGT2B11	177	UGT2B11	1	0.109519
PGM2	178	PGM2	2	0.109849
CYP4A11	179	CYP4A11	1	0.111104
MTAP	180	MTAP	2	0.111104
ABL1	181	ABL1	4	0.111434
UGT1A4	182	UGT1A4	3	0.111434
YES1	183	YES1	3	0.111698
DMGDH	184	DMGDH	1	0.112028
NNT	185	NNT	2	0.112028
ACAA1	186	ACAA1	1	0.112226
PSAT1	187	PSAT1	1	0.112535
ACY1	188	ACY1	1	0.112909
CYP19A1	189	CYP19A1	1	0.112909
FH	190	FH	1	0.113283
NDST2	191	NDST2	5	0.113283
TYRP1	192	TYRP1	2	0.113283
STAT5B	193	STAT5B	1	0.113679
ASMT	194	ASMT	1	0.113988
LIPC	195	LIPC	1	0.114208
EXT2	196	EXT2	1	0.115793
GALNT13	197	GALNT13	1	0.115793
SMAD3	198	SMAD3	1	0.115793
UQCRC2	199	UQCRC2	1	0.116079
CPOX	200	CPOX	2	0.116629
MGAT4A	201	MGAT4A	1	0.116629
PRODH	202	PRODH	1	0.116629
BDH2	203	BDH2	1	0.117444
COX10	204	COX10	1	0.117444
BDH1	205	BDH1	2	0.11784
PI4K2B	206	PI4K2B	1	0.11784
FUT2	207	FUT2	1	0.118456
GART	208	GART	1	0.118456
HPD	209	HPD	1	0.118456
KDSR	210	KDSR	1	0.118677
DGKG	211	DGKG	2	0.118919
BDP1	212	BDP1	6	0.119513
DHCR7	213	DHCR7	1	0.120306
CMBL	214	CMBL	1	0.121186
FUT6	215	FUT6	2	0.121186
ADC	216	ADC	2	0.121582
AXIN1	217	AXIN1	1	0.122485
GALNT8	218	GALNT8	1	0.122485
PHGDH	219	PHGDH	1	0.122485
CALCR	220	CALCR	5	0.123123
AK2	221	AK2	1	0.12341
PIK3C2G	222	PIK3C2G	1	0.12341
LIPT1	223	LIPT1	1	0.125237
UROC1	224	UROC1	1	0.125699
ST6GALNAC1	225	ST6GALNAC1	2	0.127152
TGIF1	226	TGIF1	2	0.128032
ALG13	227	ALG13	3	0.128561
CYSLTR2	228	CYSLTR2	4	0.129089
PANK3	229	PANK3	1	0.129573
ATP6V0E1	230	ATP6V0E1	1	0.12997
CTPS2	231	CTPS2	1	0.130586
ABAT	232	ABAT	1	0.130916
USP6	233	USP6	7	0.131246
GANC	234	GANC	2	0.132193
TYMP	235	TYMP	2	0.132193
CHPF	236	CHPF	2	0.132809
POM121	237	POM121	3	0.132809
TKTL2	238	TKTL2	1	0.132809
AGPAT6	239	AGPAT6	1	0.134042
ATP6V1A	240	ATP6V1A	1	0.138995
GPAM	241	GPAM	1	0.138995
SLC33A1	242	SLC33A1	1	0.14047
APC2	243	APC2	3	0.143684
DTYMK	244	DTYMK	2	0.144345
GTF3C4	245	GTF3C4	4	0.144983
MYH6	246	MYH6	3	0.151983
PIK3R5	247	PIK3R5	4	0.152754
PRKAR2A	248	PRKAR2A	1	0.152754
CACNA1B	249	CACNA1B	6	0.156628
AMDHD1	250	AMDHD1	2	0.161229
EIF3A	251	EIF3A	2	0.161229
ITGA2B	252	ITGA2B	1	0.165654
ITGB3	253	ITGB3	2	0.165654
LYN	254	LYN	3	0.165654
CRYL1	255	CRYL1	1	0.166358
RPL21	256	RPL21	3	0.166358
LIPG	257	LIPG	1	0.166909
LAMC3	258	LAMC3	6	0.171752
GLRA3	259	GLRA3	4	0.173821
TACR2	260	TACR2	5	0.17545
BIRC6	261	BIRC6	2	0.177652
LNPEP	262	LNPEP	3	0.180205
MET	263	MET	2	0.180205
HDAC1	264	HDAC1	1	0.181284
NUP153	265	NUP153	1	0.181856
PRKCB	266	PRKCB	1	0.182561
NOTCH1	267	NOTCH1	6	0.183926
CABIN1	268	CABIN1	3	0.185577
RPL18	269	RPL18	2	0.18758
TRAF2	270	TRAF2	3	0.18758
MAP3K3	271	MAP3K3	4	0.188372
MYH1	272	MYH1	3	0.188372
EIF1AX	273	EIF1AX	5	0.191256
MYH2	274	MYH2	3	0.192819
CTNNA2	275	CTNNA2	2	0.193612
AAAS	276	AAAS	2	0.196517
TGFBR1	277	TGFBR1	2	0.196804
HSPA1L	278	HSPA1L	2	0.1972
LAMA3	279	LAMA3	3	0.198675
UBR5	280	UBR5	4	0.198675
NCK1	281	NCK1	1	0.199687
ARHGEF6	282	ARHGEF6	1	0.202307
TDG	283	TDG	12	0.202835
TCF7L1	284	TCF7L1	3	0.203298
JUN	285	JUN	1	0.204046
MAP2K2	286	MAP2K2	3	0.204046
UGGT2	287	UGGT2	5	0.207392
SBNO1	288	SBNO1	2	0.208229
PCDHA8	289	PCDHA8	4	0.208889
RPS18	290	RPS18	3	0.208889
TSHR	291	TSHR	2	0.208889
CLTA	292	CLTA	1	0.21098
ADRA1A	293	ADRA1A	3	0.211289
GRM6	294	GRM6	3	0.211289
SOS1	295	SOS1	1	0.211289
RAPGEF1	296	RAPGEF1	5	0.214018
USP12	297	USP12	2	0.214701
TLR4	298	TLR4	4	0.215383
CDH23	299	CDH23	8	0.216066
COL4A4	300	COL4A4	4	0.217144
MAP2K3	301	MAP2K3	2	0.217144
MYH13	302	MYH13	3	0.219082
MC1R	303	MC1R	3	0.219522
DDX21	304	DDX21	4	0.22049
ITCH	305	ITCH	1	0.221921
PARK2	306	PARK2	3	0.221921
MYO9A	307	MYO9A	2	0.222318
CLCN3	308	CLCN3	2	0.223749
CTBP2	309	CTBP2	3	0.223749
MDN1	310	MDN1	3	0.224365
FAT2	311	FAT2	4	0.224871
ADCY9	312	ADCY9	3	0.225157
PRPF8	313	PRPF8	3	0.225157
CSF2RA	314	CSF2RA	2	0.225928
NUPL2	315	NUPL2	2	0.226412
C5	316	C5	3	0.226941
RASGRF2	317	RASGRF2	2	0.227799
OPRM1	318	OPRM1	1	0.22945
PPP3CC	319	PPP3CC	1	0.229758
TRIP11	320	TRIP11	3	0.229758
CANX	321	CANX	2	0.230111
HLA-B	322	HLA-B	2	0.230111
VPS28	323	VPS28	3	0.230111
ARFGEF2	324	ARFGEF2	3	0.230463
EGFR	325	EGFR	3	0.231145
POLR2B	326	POLR2B	2	0.231651
MCM7	327	MCM7	4	0.23284
PRSS1	328	PRSS1	4	0.234117
PPP2R5C	329	PPP2R5C	1	0.236803
SP1	330	SP1	1	0.236803
KDR	331	KDR	2	0.237991
PPP2R1A	332	PPP2R1A	2	0.239268
MYLK3	333	MYLK3	2	0.239665
MYC	334	MYC	2	0.241007
SEC24C	335	SEC24C	4	0.243957
FN1	336	FN1	3	0.244331
TNXB	337	TNXB	10	0.246555
APC	338	APC	1	0.246995
PTPRJ	339	PTPRJ	3	0.246995
ETS1	340	ETS1	2	0.247413
ERLEC1	341	ERLEC1	4	0.247876
ASAP2	342	ASAP2	1	0.248734
CCAR1	343	CCAR1	5	0.248734
RFXANK	344	RFXANK	2	0.248734
RPS15	345	RPS15	2	0.248734
SDC3	346	SDC3	5	0.248734
RPL8	347	RPL8	3	0.249086
YWHAE	348	YWHAE	2	0.250693
IL4R	349	IL4R	5	0.251068
ITGA1	350	ITGA1	1	0.25208
ZC3H13	351	ZC3H13	5	0.253599
IL7R	352	IL7R	5	0.254392
HIF1A	353	HIF1A	1	0.255669
ACTA2	354	ACTA2	4	0.256373
FZR1	355	FZR1	3	0.256373
SEC24D	356	SEC24D	3	0.256989
GUCY2F	357	GUCY2F	4	0.257738
OR1B1	358	OR1B1	2	0.257738
HLA-DQA2	359	HLA-DQA2	2	0.258222
AXIN2	360	AXIN2	3	0.25864
CTBP1	361	CTBP1	2	0.259675
GLP2R	362	GLP2R	3	0.259675
ASH1L	363	ASH1L	2	0.260291
PROS1	364	PROS1	2	0.26082
CDH2	365	CDH2	1	0.261458
PSD3	366	PSD3	4	0.261458
GRIN1	367	GRIN1	3	0.26355
FAT1	368	FAT1	3	0.26727
UBXN6	369	UBXN6	4	0.26727
APOB	370	APOB	4	0.267666
CCNH	371	CCNH	1	0.26815
DARC	372	DARC	6	0.26815
TP73	373	TP73	2	0.268635
C4A	374	C4A	4	0.269009
KNG1	375	KNG1	1	0.269009
POU2F2	376	POU2F2	1	0.269625
NKD1	377	NKD1	1	0.27044
BAD	378	BAD	1	0.270924
NRG1	379	NRG1	5	0.271452
WRN	380	WRN	3	0.271452
VAV2	381	VAV2	4	0.272135
GRIA2	382	GRIA2	2	0.27361
IFNA17	383	IFNA17	2	0.274182
SEC31B	384	SEC31B	4	0.274689
AP3S1	385	AP3S1	5	0.275349
HLA-DQA1	386	HLA-DQA1	2	0.275349
ITGA10	387	ITGA10	3	0.275745
TMF1	388	TMF1	2	0.275745
YWHAQ	389	YWHAQ	1	0.275745
CNGB1	390	CNGB1	2	0.276274
MAPK3	391	MAPK3	1	0.276274
NUMA1	392	NUMA1	2	0.276274
TGFBR2	393	TGFBR2	1	0.276274
TERT	394	TERT	3	0.278145
EIF3D	395	EIF3D	3	0.278541
IL6ST	396	IL6ST	1	0.278541
FLNC	397	FLNC	5	0.279333
NUP37	398	NUP37	1	0.279333
PIK3R2	399	PIK3R2	1	0.279994
PRPF6	400	PRPF6	2	0.28061
SH3KBP1	401	SH3KBP1	2	0.28061
PCDH17	402	PCDH17	5	0.281359
STRN	403	STRN	1	0.281975
ITGA11	404	ITGA11	1	0.282768
BPTF	405	BPTF	2	0.284441
N4BP2	406	N4BP2	2	0.285123
CCNB1	407	CCNB1	1	0.285585
POLR2K	408	POLR2K	1	0.285585
ADCY7	409	ADCY7	1	0.286312
GABRQ	410	GABRQ	3	0.286312
RPL12	411	RPL12	3	0.286972
SSTR2	412	SSTR2	1	0.288535
COL27A1	413	COL27A1	12	0.289746
GABRA2	414	GABRA2	2	0.289746
PRKCE	415	PRKCE	2	0.289746
RAB11FIP3	416	RAB11FIP3	1	0.289746
NSFL1C	417	NSFL1C	3	0.290516
BCLAF1	418	BCLAF1	6	0.294061
F5	419	F5	7	0.294061
DNAH3	420	DNAH3	3	0.294787
BRCA2	421	BRCA2	5	0.295426
EFTUD2	422	EFTUD2	2	0.295426
PTK2B	423	PTK2B	2	0.295426
PPP3CB	424	PPP3CB	4	0.296306
FSHR	425	FSHR	2	0.297429
PARP4	426	PARP4	13	0.297429
WNT11	427	WNT11	2	0.297429
ETF1	428	ETF1	2	0.298243
NOTCH4	429	NOTCH4	3	0.298926
OCLN	430	OCLN	1	0.298926
RIF1	431	RIF1	1	0.298926
IFNAR2	432	IFNAR2	3	0.300247
CDH15	433	CDH15	3	0.301347
AP3B1	434	AP3B1	5	0.302074
ARSA	435	ARSA	5	0.30324
SVEP1	436	SVEP1	4	0.30324
POLR2H	437	POLR2H	1	0.304077
HLA-DRA	438	HLA-DRA	1	0.304693
FRAT1	439	FRAT1	2	0.30531
PLA2G1B	440	PLA2G1B	2	0.30531
SMURF1	441	SMURF1	1	0.30531
VCL	442	VCL	6	0.30531
HSP90AA1	443	HSP90AA1	1	0.30597
LSM7	444	LSM7	2	0.306719
MYH7	445	MYH7	1	0.306719
CASP7	446	CASP7	2	0.310307
PIK3CG	447	PIK3CG	2	0.311187
TFE3	448	TFE3	1	0.311187
VCAM1	449	VCAM1	2	0.313609
JMJD1C	450	JMJD1C	5	0.314666
BMPR1A	451	BMPR1A	4	0.315502
EXOSC4	452	EXOSC4	3	0.315502
FZD10	453	FZD10	2	0.315502
REST	454	REST	1	0.315502
ABCA2	455	ABCA2	4	0.316955
MAP2K6	456	MAP2K6	1	0.317946
PHKA2	457	PHKA2	3	0.317946
CDC42	458	CDC42	1	0.320653
CDH5	459	CDH5	2	0.320653
LRP1	460	LRP1	2	0.320653
IL2RG	461	IL2RG	1	0.32149
SF3A1	462	SF3A1	2	0.322172
POLR1D	463	POLR1D	2	0.323185
PPP3R2	464	PPP3R2	2	0.323185
PLAUR	465	PLAUR	1	0.325298
ANAPC1	466	ANAPC1	1	0.326201
IL2RB	467	IL2RB	1	0.326201
PCNT	468	PCNT	6	0.326201
U2AF2	469	U2AF2	1	0.326201
FCGR3A	470	FCGR3A	2	0.328226
RASGRP3	471	RASGRP3	3	0.328226
SNRNP70	472	SNRNP70	1	0.328226
UTP14C	473	UTP14C	4	0.328226
ARRB1	474	ARRB1	1	0.329085
CACNA1E	475	CACNA1E	3	0.330251
CTSG	476	CTSG	1	0.330251
FGF23	477	FGF23	1	0.330251
GRK4	478	GRK4	3	0.330251
SNW1	479	SNW1	2	0.33122
GRM2	480	GRM2	2	0.332145
IL15RA	481	IL15RA	3	0.332145
DNASE2	482	DNASE2	4	0.333223
LAMA5	483	LAMA5	1	0.333223
PIAS3	484	PIAS3	1	0.334324
CX3CR1	485	CX3CR1	1	0.336173
DDX42	486	DDX42	3	0.336173
ARAP3	487	ARAP3	2	0.337164
DNAH9	488	DNAH9	6	0.337164
TAP1	489	TAP1	3	0.337164
CALML5	490	CALML5	1	0.338308
NUP93	491	NUP93	1	0.338308
ASAP1	492	ASAP1	2	0.339189
DHX8	493	DHX8	3	0.339189
DPP8	494	DPP8	1	0.34018
EIF3F	495	EIF3F	3	0.34018
RPL4	496	RPL4	1	0.34018
S1PR4	497	S1PR4	3	0.34018
KCNMA1	498	KCNMA1	7	0.341192
MYH3	499	MYH3	2	0.341192
LTB4R2	500	LTB4R2	1	0.342073
C3	501	C3	2	0.343372
RAPGEF6	502	RAPGEF6	1	0.34445
TNFRSF10D	503	TNFRSF10D	2	0.34445
HLA-F	504	HLA-F	1	0.345397
HNF1A	505	HNF1A	1	0.346608
WWP1	506	WWP1	1	0.346608
CAMK2D	507	CAMK2D	1	0.347752
CDH7	508	CDH7	2	0.349756
DNAH7	509	DNAH7	3	0.349756
PCBP1	510	PCBP1	1	0.349756
DCC	511	DCC	3	0.35101
RPS11	512	RPS11	1	0.35101
SFTPD	513	SFTPD	6	0.35101
ATP2A3	514	ATP2A3	2	0.351979
PPP2R5B	515	PPP2R5B	1	0.351979
CDH12	516	CDH12	3	0.35308
CDH4	517	CDH4	2	0.35429
CHRM1	518	CHRM1	1	0.35429
GABRB3	519	GABRB3	2	0.35429
KIAA2018	520	KIAA2018	2	0.35429
GNAI1	521	GNAI1	1	0.355655
RYR2	522	RYR2	3	0.356624
HELLS	523	HELLS	3	0.357725
HLA-DQB1	524	HLA-DQB1	1	0.357725
COL4A6	525	COL4A6	1	0.358627
TAF1C	526	TAF1C	4	0.358627
DYNC1LI2	527	DYNC1LI2	2	0.360322
SPTAN1	528	SPTAN1	5	0.360322
UBQLN3	529	UBQLN3	2	0.361423
SRRM1	530	SRRM1	1	0.362193
TUBB2B	531	TUBB2B	1	0.362193
C7	532	C7	2	0.363074
GRIK1	533	GRIK1	2	0.364153
NUP160	534	NUP160	1	0.364153
UBR1	535	UBR1	3	0.364153
ALMS1	536	ALMS1	5	0.365341
GSTA2	537	GSTA2	5	0.365341
UBA7	538	UBA7	2	0.365341
TTC37	539	TTC37	2	0.36653
FCGR2B	540	FCGR2B	1	0.367477
GIT1	541	GIT1	1	0.367477
GRM1	542	GRM1	1	0.367477
HNRNPH2	543	HNRNPH2	1	0.367477
SMC3	544	SMC3	2	0.367477
HDAC2	545	HDAC2	1	0.36992
KIF27	546	KIF27	3	0.36992
DNAH5	547	DNAH5	4	0.371109
HNRNPD	548	HNRNPD	1	0.371109
DAAM1	549	DAAM1	2	0.373266
GGA3	550	GGA3	1	0.373266
CEP192	551	CEP192	5	0.374147
CSF2RB	552	CSF2RB	3	0.374147
RGP1	553	RGP1	2	0.374147
APAF1	554	APAF1	2	0.375204
COL3A1	555	COL3A1	1	0.376194
ERCC3	556	ERCC3	2	0.376194
G3BP2	557	G3BP2	2	0.376194
NUP155	558	NUP155	1	0.376194
CDC40	559	CDC40	1	0.377295
PCDHA10	560	PCDHA10	4	0.377295
MAP2K7	561	MAP2K7	2	0.379452
DRD5	562	DRD5	1	0.382975
HLA-DPB1	563	HLA-DPB1	1	0.382975
PRKCA	564	PRKCA	1	0.382975
RPL10A	565	RPL10A	1	0.382975
HSPH1	566	HSPH1	3	0.384339
GUCY1A3	567	GUCY1A3	2	0.38566
RBBP4	568	RBBP4	1	0.38566
RPL3	569	RPL3	1	0.387069
ALB	570	ALB	2	0.389601
CLTCL1	571	CLTCL1	1	0.389601
RPL9	572	RPL9	1	0.389601
SEC24B	573	SEC24B	1	0.389601
ACIN1	574	ACIN1	2	0.390547
CEL	575	CEL	4	0.390547
CDK12	576	CDK12	1	0.392066
PLEKHA1	577	PLEKHA1	1	0.392066
TAOK1	578	TAOK1	1	0.392066
EXOC6	579	EXOC6	4	0.393453
RPL19	580	RPL19	1	0.393453
CCM2	581	CCM2	1	0.394818
NPFFR2	582	NPFFR2	1	0.394818
CD36	583	CD36	2	0.39746
CDH11	584	CDH11	2	0.39746
ELL	585	ELL	2	0.39746
F2	586	F2	1	0.39746
HNF4A	587	HNF4A	1	0.39746
ACVR2A	588	ACVR2A	2	0.398736
CNR1	589	CNR1	1	0.400123
TNFRSF10A	590	TNFRSF10A	2	0.400123
NUP35	591	NUP35	1	0.401136
OR2AE1	592	OR2AE1	1	0.401136
PARD3	593	PARD3	1	0.401136
ADCY2	594	ADCY2	1	0.403557
ATP2B4	595	ATP2B4	2	0.403557
DNAJA2	596	DNAJA2	2	0.403557
GOSR2	597	GOSR2	1	0.403557
ABR	598	ABR	4	0.404834
ATR	599	ATR	3	0.404834
GYS2	600	GYS2	2	0.404834
HLA-DPA1	601	HLA-DPA1	1	0.404834
RNF168	602	RNF168	1	0.404834
SRP72	603	SRP72	5	0.404834
CDKN2A	604	CDKN2A	1	0.406001
RPS19	605	RPS19	1	0.406001
HNRNPL	606	HNRNPL	1	0.407278
MBTPS1	607	MBTPS1	4	0.407278
CCDC6	608	CCDC6	5	0.408731
FCGR2A	609	FCGR2A	1	0.408731
MAN2B1	610	MAN2B1	4	0.408731
CACNA1G	611	CACNA1G	3	0.410096
SMARCA1	612	SMARCA1	2	0.410096
THBS3	613	THBS3	2	0.410096
ANAPC5	614	ANAPC5	1	0.411592
FZD9	615	FZD9	2	0.411592
ITGA7	616	ITGA7	2	0.411592
LAMP3	617	LAMP3	4	0.411592
LPL	618	LPL	1	0.411592
MAP4K4	619	MAP4K4	2	0.411592
NFATC4	620	NFATC4	1	0.411592
SLC7A11	621	SLC7A11	2	0.411592
DOK1	622	DOK1	1	0.412935
ITGB5	623	ITGB5	2	0.412935
LAPTM5	624	LAPTM5	2	0.412935
NHLRC2	625	NHLRC2	1	0.412935
POLRMT	626	POLRMT	3	0.412935
PSMA4	627	PSMA4	1	0.412935
CLN5	628	CLN5	3	0.414454
OLR1	629	OLR1	1	0.414454
PCDH15	630	PCDH15	2	0.414454
TXNL4A	631	TXNL4A	1	0.414454
ACTA1	632	ACTA1	1	0.415819
CACNA1C	633	CACNA1C	1	0.415819
EDF1	634	EDF1	3	0.415819
GRIK4	635	GRIK4	1	0.415819
LPAR6	636	LPAR6	4	0.415819
F7	637	F7	1	0.417382
SRCAP	638	SRCAP	2	0.417382
TACR3	639	TACR3	1	0.417382
DERL1	640	DERL1	2	0.418439
HERC3	641	HERC3	2	0.418439
HIPK3	642	HIPK3	1	0.418439
HNRNPF	643	HNRNPF	1	0.418439
NUP54	644	NUP54	1	0.418439
GABBR2	645	GABBR2	2	0.420002
OPRL1	646	OPRL1	1	0.420002
ROCK1	647	ROCK1	1	0.420002
OR2S2	648	OR2S2	1	0.421301
CNGA4	649	CNGA4	1	0.422621
RHOQ	650	RHOQ	2	0.422621
CACNA1D	651	CACNA1D	1	0.423832
GDI1	652	GDI1	1	0.423832
H2AFY2	653	H2AFY2	4	0.423832
HTT	654	HTT	2	0.423832
RYR1	655	RYR1	4	0.423832
WFS1	656	WFS1	3	0.423832
HRH3	657	HRH3	1	0.425505
SLC8A1	658	SLC8A1	2	0.425505
CNGA3	659	CNGA3	1	0.42687
KIAA1109	660	KIAA1109	2	0.42687
LMBRD2	661	LMBRD2	1	0.42687
NMUR2	662	NMUR2	1	0.42687
SMURF2	663	SMURF2	1	0.42687
THBS1	664	THBS1	1	0.42687
ADORA3	665	ADORA3	1	0.428213
TTBK2	666	TTBK2	1	0.428213
VDAC1	667	VDAC1	1	0.428213
SIRT1	668	SIRT1	4	0.429666
REV3L	669	REV3L	2	0.431229
HTR5A	670	HTR5A	1	0.432572
HNRNPA1L2	671	HNRNPA1L2	4	0.434245
SPRY2	672	SPRY2	3	0.434245
ANAPC2	673	ANAPC2	3	0.437217
CAPN13	674	CAPN13	4	0.437217
MC5R	675	MC5R	2	0.437217
MUC5B	676	MUC5B	7	0.437217
RELA	677	RELA	1	0.437217
ARAP2	678	ARAP2	1	0.438824
BBC3	679	BBC3	1	0.438824
CDKN1A	680	CDKN1A	1	0.438824
UBQLN2	681	UBQLN2	3	0.438824
ADCY8	682	ADCY8	1	0.440497
CXCR1	683	CXCR1	2	0.440497
IGF1R	684	IGF1R	2	0.440497
STAG1	685	STAG1	1	0.440497
PDE1A	686	PDE1A	2	0.442896
S1PR1	687	S1PR1	1	0.442896
UBR2	688	UBR2	1	0.442896
FLT3	689	FLT3	3	0.444547
GRB10	690	GRB10	2	0.444547
MAD1L1	691	MAD1L1	1	0.444547
TAAR5	692	TAAR5	1	0.444547
TCF3	693	TCF3	4	0.444547
CXCL16	694	CXCL16	2	0.446374
FAM120B	695	FAM120B	9	0.446374
ROBO2	696	ROBO2	3	0.446374
DYNC1I1	697	DYNC1I1	2	0.448488
EIF3E	698	EIF3E	2	0.448488
FPR1	699	FPR1	2	0.448488
CPSF3	700	CPSF3	2	0.450227
FBXL3	701	FBXL3	3	0.450227
MYH8	702	MYH8	1	0.450227
SCYL2	703	SCYL2	1	0.450227
SVIL	704	SVIL	4	0.450227
DLC1	705	DLC1	4	0.451966
DOCK7	706	DOCK7	6	0.451966
KPNA1	707	KPNA1	1	0.451966
TUBB1	708	TUBB1	1	0.451966
ATP2A2	709	ATP2A2	1	0.454079
PIK3R3	710	PIK3R3	1	0.454079
POLR2A	711	POLR2A	1	0.454079
RNMT	712	RNMT	1	0.454079
SDC1	713	SDC1	1	0.454079
SEC61A1	714	SEC61A1	2	0.454079
AKAP10	715	AKAP10	2	0.45584
CIITA	716	CIITA	6	0.45584
FBXL5	717	FBXL5	1	0.45584
LAT	718	LAT	1	0.45584
NDUFV2	719	NDUFV2	1	0.45584
SH3GLB2	720	SH3GLB2	4	0.45584
CHRNB1	721	CHRNB1	2	0.457491
DBNL	722	DBNL	4	0.457491
F9	723	F9	2	0.457491
MC3R	724	MC3R	1	0.457491
RSF1	725	RSF1	1	0.457491
CPSF2	726	CPSF2	1	0.459539
EPHB1	727	EPHB1	2	0.459539
PLCB4	728	PLCB4	1	0.459539
PYGO1	729	PYGO1	1	0.459539
CD19	730	CD19	1	0.461366
COL11A1	731	COL11A1	3	0.461366
GALNS	732	GALNS	3	0.461366
ITGAV	733	ITGAV	1	0.461366
CDKN1B	734	CDKN1B	1	0.463237
DDX23	735	DDX23	1	0.463237
HECTD1	736	HECTD1	1	0.463237
HCRTR1	737	HCRTR1	2	0.464976
HERC4	738	HERC4	5	0.464976
HNRNPH1	739	HNRNPH1	1	0.464976
RC3H2	740	RC3H2	3	0.464976
SNRNP40	741	SNRNP40	1	0.464976
STAT4	742	STAT4	2	0.464976
ATP6V0A1	743	ATP6V0A1	2	0.466715
PSME2	744	PSME2	1	0.466715
BCAP31	745	BCAP31	1	0.468806
CACNA1S	746	CACNA1S	2	0.468806
HTR4	747	HTR4	1	0.468806
KIR3DL2	748	KIR3DL2	4	0.468806
NIPBL	749	NIPBL	3	0.468806
SNAPC4	750	SNAPC4	5	0.468806
P2RY4	751	P2RY4	2	0.470568
XRCC5	752	XRCC5	2	0.470568
NGEF	753	NGEF	2	0.472681
POLD1	754	POLD1	1	0.472681
POLR2J	755	POLR2J	1	0.474684
EIF2S2	756	EIF2S2	1	0.476709
SMARCA5	757	SMARCA5	1	0.476709
COL5A1	758	COL5A1	7	0.478537
ARHGAP10	759	ARHGAP10	2	0.480782
CSTF2	760	CSTF2	1	0.480782
IL22	761	IL22	2	0.480782
UBA6	762	UBA6	2	0.480782
GRM4	763	GRM4	1	0.483247
DNAH10	764	DNAH10	3	0.485251
PROZ	765	PROZ	2	0.485251
CHRNA9	766	CHRNA9	1	0.487342
P2RY8	767	P2RY8	1	0.487342
RGS3	768	RGS3	4	0.487342
STUB1	769	STUB1	1	0.487342
ELMO1	770	ELMO1	1	0.489499
LAMA1	771	LAMA1	2	0.489499
NUP43	772	NUP43	1	0.489499
PCDHAC1	773	PCDHAC1	2	0.489499
PDE4B	774	PDE4B	1	0.489499
SMARCAL1	775	SMARCAL1	2	0.489499
CPSF1	776	CPSF1	3	0.491525
EEF1A1	777	EEF1A1	1	0.491525
FGFR2	778	FGFR2	1	0.491525
GNPAT	779	GNPAT	1	0.491525
GPR35	780	GPR35	4	0.491525
PNPT1	781	PNPT1	2	0.491525
TG	782	TG	18	0.493726
MANBA	783	MANBA	2	0.495817
P2RX3	784	P2RX3	1	0.495817
PIGC	785	PIGC	1	0.495817
UBE2G1	786	UBE2G1	1	0.495817
ABCD1	787	ABCD1	2	0.4976
ARHGAP30	788	ARHGAP30	2	0.4976
CCR8	789	CCR8	1	0.4976
GABBR1	790	GABBR1	1	0.4976
IKBKE	791	IKBKE	2	0.4976
TAF1L	792	TAF1L	3	0.4976
CCT2	793	CCT2	2	0.49967
ETV1	794	ETV1	1	0.49967
GNA11	795	GNA11	2	0.49967
MAML1	796	MAML1	4	0.49967
USP8	797	USP8	1	0.49967
ERBB2	798	ERBB2	2	0.502025
IARS	799	IARS	4	0.504249
RNF128	800	RNF128	1	0.504249
SETD2	801	SETD2	2	0.504249
ARHGAP18	802	ARHGAP18	3	0.506736
DNAI2	803	DNAI2	1	0.506736
ERCC6	804	ERCC6	3	0.506736
PIP5K1A	805	PIP5K1A	3	0.506736
RPL22L1	806	RPL22L1	2	0.506736
SELP	807	SELP	2	0.506736
NPR2	808	NPR2	2	0.509576
PCDHA7	809	PCDHA7	1	0.509576
SMUG1	810	SMUG1	3	0.509576
LATS1	811	LATS1	1	0.511954
NRCAM	812	NRCAM	3	0.511954
PDE3A	813	PDE3A	2	0.511954
TUBGCP4	814	TUBGCP4	2	0.511954
WEE1	815	WEE1	1	0.511954
FGD3	816	FGD3	2	0.514485
HK1	817	HK1	4	0.514485
MCM8	818	MCM8	2	0.516819
MPDZ	819	MPDZ	3	0.516819
MYLK	820	MYLK	3	0.516819
UBE2F	821	UBE2F	3	0.516819
MUC7	822	MUC7	5	0.519702
SERINC5	823	SERINC5	1	0.519702
VPS4B	824	VPS4B	1	0.519702
CCT3	825	CCT3	1	0.522212
DHX33	826	DHX33	1	0.522212
P4HB	827	P4HB	1	0.522212
TIAM2	828	TIAM2	1	0.522212
PCDH11X	829	PCDH11X	2	0.524611
SIGLEC1	830	SIGLEC1	4	0.524611
CXADR	831	CXADR	1	0.527187
FLNB	832	FLNB	2	0.527187
PCDH19	833	PCDH19	1	0.527187
RSC1A1	834	RSC1A1	2	0.527187
TBPL2	835	TBPL2	1	0.527187
VAV3	836	VAV3	1	0.527187
CHCHD1	837	CHCHD1	5	0.529917
MADD	838	MADD	3	0.529917
MMRN2	839	MMRN2	6	0.529917
MYH15	840	MYH15	2	0.529917
SMARCC2	841	SMARCC2	2	0.529917
CASP10	842	CASP10	1	0.532602
DNA2	843	DNA2	4	0.532602
DOK2	844	DOK2	1	0.532602
DYNLL1	845	DYNLL1	1	0.532602
FOXH1	846	FOXH1	3	0.532602
PCDHA2	847	PCDHA2	1	0.532602
RANBP1	848	RANBP1	1	0.532602
SFRP4	849	SFRP4	1	0.532602
ADRB2	850	ADRB2	1	0.535244
FAM63B	851	FAM63B	2	0.535244
PDE5A	852	PDE5A	3	0.535244
T	853	T	1	0.535244
BCAR1	854	BCAR1	1	0.53749
BCL9	855	BCL9	2	0.53749
CHD9	856	CHD9	1	0.53749
CLIP1	857	CLIP1	2	0.53749
RAD23A	858	RAD23A	2	0.53749
A2M	859	A2M	1	0.540043
ABI2	860	ABI2	1	0.540043
CEP164	861	CEP164	3	0.540043
DIS3	862	DIS3	4	0.540043
EIF2B3	863	EIF2B3	1	0.540043
KIF2C	864	KIF2C	2	0.540043
NOX1	865	NOX1	1	0.540043
AQP7	866	AQP7	5	0.542002
ARHGEF15	867	ARHGEF15	4	0.542002
FRRS1	868	FRRS1	3	0.542002
STAM2	869	STAM2	1	0.542002
CBL	870	CBL	1	0.544776
MCHR1	871	MCHR1	1	0.544776
MLYCD	872	MLYCD	4	0.544776
NPAT	873	NPAT	1	0.544776
RPN1	874	RPN1	1	0.544776
SSNA1	875	SSNA1	3	0.544776
CACNA2D3	876	CACNA2D3	3	0.54711
CENPJ	877	CENPJ	3	0.54711
EEF2K	878	EEF2K	1	0.54711
PIGP	879	PIGP	1	0.54711
THBS4	880	THBS4	1	0.54711
WDFY3	881	WDFY3	1	0.54711
CDH6	882	CDH6	1	0.549597
PRKRA	883	PRKRA	4	0.549597
TNFSF8	884	TNFSF8	3	0.549597
EDEM3	885	EDEM3	1	0.551931
PARD6B	886	PARD6B	1	0.551931
PTPRK	887	PTPRK	1	0.551931
TRRAP	888	TRRAP	6	0.551931
AVP	889	AVP	1	0.554616
EXOSC2	890	EXOSC2	3	0.554616
LAPTM4B	891	LAPTM4B	2	0.554616
NFIA	892	NFIA	2	0.554616
PSD2	893	PSD2	2	0.554616
RXRA	894	RXRA	3	0.554616
TRAF6	895	TRAF6	1	0.554616
GCC2	896	GCC2	2	0.557104
GTF2H4	897	GTF2H4	1	0.557104
HSPG2	898	HSPG2	2	0.557104
NBPF10	899	NBPF10	3	0.557104
PAWR	900	PAWR	1	0.557104
ADCY10	901	ADCY10	2	0.559525
HLA-DMB	902	HLA-DMB	1	0.559525
PSMF1	903	PSMF1	1	0.559525
SLC3A1	904	SLC3A1	2	0.559525
VEGFA	905	VEGFA	1	0.559525
C2	906	C2	2	0.561859
CAV2	907	CAV2	2	0.561859
COL9A1	908	COL9A1	2	0.561859
F2RL3	909	F2RL3	1	0.561859
ITGAM	910	ITGAM	1	0.561859
NSD1	911	NSD1	2	0.561859
CEP350	912	CEP350	2	0.564456
CTNNAL1	913	CTNNAL1	3	0.564456
ENTPD6	914	ENTPD6	2	0.564456
ERBB3	915	ERBB3	1	0.564456
EXOSC3	916	EXOSC3	3	0.564456
HSP90AB1	917	HSP90AB1	1	0.564456
MTA2	918	MTA2	2	0.564456
UQCR11	919	UQCR11	2	0.564456
COL9A3	920	COL9A3	2	0.566416
DDB1	921	DDB1	1	0.566416
GLG1	922	GLG1	1	0.566416
HLTF	923	HLTF	1	0.566416
BAG2	924	BAG2	1	0.568485
KIR3DL1	925	KIR3DL1	3	0.568485
MAP3K5	926	MAP3K5	1	0.568485
PARS2	927	PARS2	3	0.568485
PCDHGA11	928	PCDHGA11	1	0.568485
PRKCSH	929	PRKCSH	2	0.568485
ZFR	930	ZFR	2	0.568485
TP53BP1	931	TP53BP1	3	0.570929
UBE2M	932	UBE2M	1	0.570929
CDC25C	933	CDC25C	1	0.573372
ITGA3	934	ITGA3	1	0.573372
KRTCAP2	935	KRTCAP2	1	0.573372
MOGS	936	MOGS	2	0.573372
VEGFB	937	VEGFB	1	0.573372
ABCA7	938	ABCA7	4	0.576102
APRT	939	APRT	3	0.576102
CEP72	940	CEP72	3	0.576102
CHRNB4	941	CHRNB4	1	0.576102
FLNA	942	FLNA	1	0.576102
LRRK2	943	LRRK2	2	0.576102
PCDHGA5	944	PCDHGA5	1	0.576102
PDX1	945	PDX1	2	0.576102
PPARGC1A	946	PPARGC1A	1	0.576102
TRAF3	947	TRAF3	1	0.576102
ABCC2	948	ABCC2	4	0.578589
KDM3B	949	KDM3B	1	0.578589
LAMA4	950	LAMA4	2	0.578589
DNAL1	951	DNAL1	2	0.580923
E2F3	952	E2F3	1	0.580923
PCDHB12	953	PCDHB12	2	0.580923
PIP4K2A	954	PIP4K2A	2	0.580923
SAP18	955	SAP18	2	0.580923
SEC24A	956	SEC24A	1	0.580923
AKAP9	957	AKAP9	3	0.583322
DNAH2	958	DNAH2	5	0.583322
HIST1H2AC	959	HIST1H2AC	1	0.583322
LBP	960	LBP	1	0.583322
PCDHA6	961	PCDHA6	1	0.583322
PCDHB6	962	PCDHB6	2	0.583322
RAD54L2	963	RAD54L2	1	0.583322
IFNE	964	IFNE	2	0.585524
PCDHB4	965	PCDHB4	1	0.585524
PLA2R1	966	PLA2R1	4	0.585524
SLC25A10	967	SLC25A10	2	0.585524
SLC9A1	968	SLC9A1	2	0.585524
THOC1	969	THOC1	1	0.585524
TSPO	970	TSPO	1	0.585524
CRYAB	971	CRYAB	1	0.588187
DPYSL5	972	DPYSL5	3	0.588187
EPHA8	973	EPHA8	2	0.588187
ICAM1	974	ICAM1	2	0.588187
IKBKAP	975	IKBKAP	3	0.588187
MST1	976	MST1	5	0.588187
PLXNB1	977	PLXNB1	3	0.588187
TAS2R43	978	TAS2R43	3	0.588187
BARD1	979	BARD1	2	0.590697
CDH26	980	CDH26	1	0.590697
FYB	981	FYB	1	0.590697
LAMP2	982	LAMP2	1	0.590697
PCDHB1	983	PCDHB1	1	0.590697
PCDHGB2	984	PCDHGB2	3	0.590697
RAB5C	985	RAB5C	1	0.590697
SEMA5B	986	SEMA5B	2	0.590697
UNC13B	987	UNC13B	4	0.590697
APBB1	988	APBB1	2	0.593581
COL12A1	989	COL12A1	1	0.593581
DNAH1	990	DNAH1	2	0.593581
KIAA0947	991	KIAA0947	2	0.593581
MTSS1	992	MTSS1	5	0.593581
PCDHB10	993	PCDHB10	1	0.593581
PPP1R3B	994	PPP1R3B	1	0.593581
PRPF4	995	PRPF4	2	0.593581
RRBP1	996	RRBP1	1	0.593581
SMARCA2	997	SMARCA2	1	0.593581
ACAP1	998	ACAP1	2	0.596178
CACNA2D1	999	CACNA2D1	3	0.596178
EPOR	1000	EPOR	2	0.596178
GSTM3	1001	GSTM3	2	0.596178
KIF2B	1002	KIF2B	2	0.596178
NCOA3	1003	NCOA3	2	0.596178
PHKB	1004	PHKB	1	0.596178
TEK	1005	TEK	4	0.596178
BCL6	1006	BCL6	1	0.598644
COL6A2	1007	COL6A2	5	0.598644
MVD	1008	MVD	3	0.598644
PEX6	1009	PEX6	2	0.598644
SLC7A6	1010	SLC7A6	2	0.598644
SPTBN1	1011	SPTBN1	2	0.598644
CD48	1012	CD48	2	0.601528
FGD1	1013	FGD1	2	0.601528
MLLT4	1014	MLLT4	1	0.601528
NFE2L2	1015	NFE2L2	1	0.601528
PARD3B	1016	PARD3B	2	0.601528
PLXNA3	1017	PLXNA3	2	0.601528
ABCC3	1018	ABCC3	1	0.604368
CARD9	1019	CARD9	5	0.604368
CGN	1020	CGN	2	0.604368
DNAJB11	1021	DNAJB11	2	0.604368
GTF2F2	1022	GTF2F2	2	0.604368
HCLS1	1023	HCLS1	1	0.604368
RXFP1	1024	RXFP1	1	0.604368
STAG2	1025	STAG2	1	0.604368
ZMIZ2	1026	ZMIZ2	3	0.604368
C11orf48	1027	C11orf48	3	0.607648
CADM1	1028	CADM1	2	0.607648
GMIP	1029	GMIP	2	0.607648
KDM5A	1030	KDM5A	1	0.607648
OGG1	1031	OGG1	2	0.607648
PPM1D	1032	PPM1D	5	0.607648
PRKD1	1033	PRKD1	3	0.607648
RREB1	1034	RREB1	2	0.607648
BAG1	1035	BAG1	1	0.61073
BCR	1036	BCR	2	0.61073
COL17A1	1037	COL17A1	2	0.61073
MAPRE1	1038	MAPRE1	1	0.61073
NDUFB7	1039	NDUFB7	1	0.61073
PRB2	1040	PRB2	6	0.61073
RAD50	1041	RAD50	1	0.61073
TLN1	1042	TLN1	1	0.61073
ZFHX3	1043	ZFHX3	8	0.61073
ARHGAP29	1044	ARHGAP29	2	0.613217
ATP1A1	1045	ATP1A1	1	0.613217
LRRC4C	1046	LRRC4C	2	0.613217
NSMAF	1047	NSMAF	2	0.613217
RBM17	1048	RBM17	1	0.613217
ADAT1	1049	ADAT1	1	0.615881
CYLD	1050	CYLD	1	0.615881
MYO1F	1051	MYO1F	2	0.615881
PCDHB11	1052	PCDHB11	2	0.615881
PCDHGA12	1053	PCDHGA12	1	0.615881
SEMA3E	1054	SEMA3E	3	0.615881
STX8	1055	STX8	2	0.615881
ZNF143	1056	ZNF143	1	0.615881
ZNHIT1	1057	ZNHIT1	1	0.615881
ABCA1	1058	ABCA1	3	0.618919
ABCG8	1059	ABCG8	2	0.618919
ARHGEF2	1060	ARHGEF2	2	0.618919
COL5A3	1061	COL5A3	7	0.618919
EXOC2	1062	EXOC2	1	0.618919
GRIN2D	1063	GRIN2D	2	0.618919
HSPD1	1064	HSPD1	2	0.618919
LZTS1	1065	LZTS1	1	0.618919
PCSK1	1066	PCSK1	2	0.618919
PCSK7	1067	PCSK7	2	0.618919
PSMD5	1068	PSMD5	3	0.618919
RRN3	1069	RRN3	1	0.618919
SVIP	1070	SVIP	1	0.618919
TRA2B	1071	TRA2B	1	0.618919
AKAP13	1072	AKAP13	3	0.621758
CD5	1073	CD5	4	0.621758
EHMT1	1074	EHMT1	5	0.621758
FGF9	1075	FGF9	1	0.621758
HEATR1	1076	HEATR1	4	0.621758
PRPF38A	1077	PRPF38A	1	0.621758
PCDHGA2	1078	PCDHGA2	1	0.624466
TNFSF4	1079	TNFSF4	1	0.624466
ABCC11	1080	ABCC11	3	0.627218
CACNA1H	1081	CACNA1H	1	0.627218
CAV1	1082	CAV1	1	0.627218
CFTR	1083	CFTR	2	0.627218
DHX16	1084	DHX16	1	0.627218
NKX2-1	1085	NKX2-1	3	0.627218
P2RX7	1086	P2RX7	1	0.627218
SIRPG	1087	SIRPG	2	0.627218
SYF2	1088	SYF2	1	0.627218
TUBGCP6	1089	TUBGCP6	2	0.627218
UBQLNL	1090	UBQLNL	1	0.627218
ATRX	1091	ATRX	3	0.630476
C9orf129	1092	C9orf129	2	0.630476
CPT1B	1093	CPT1B	2	0.630476
ENTPD2	1094	ENTPD2	4	0.630476
IL18RAP	1095	IL18RAP	2	0.630476
KIF23	1096	KIF23	1	0.630476
MME	1097	MME	1	0.630476
MYH11	1098	MYH11	2	0.630476
NCOR1	1099	NCOR1	1	0.630476
PENK	1100	PENK	1	0.630476
PINK1	1101	PINK1	1	0.630476
RAD21	1102	RAD21	2	0.630476
RANBP3	1103	RANBP3	2	0.630476
EDEM1	1104	EDEM1	1	0.633756
INHBC	1105	INHBC	1	0.633756
LSMD1	1106	LSMD1	1	0.633756
RAB11FIP2	1107	RAB11FIP2	1	0.633756
SH3GL1	1108	SH3GL1	3	0.633756
ANAPC10	1109	ANAPC10	1	0.637014
BMX	1110	BMX	2	0.637014
CHN1	1111	CHN1	2	0.637014
DNAJB1	1112	DNAJB1	1	0.637014
GRIN2A	1113	GRIN2A	1	0.637014
NR5A1	1114	NR5A1	3	0.637014
STAT2	1115	STAT2	1	0.637014
THOC2	1116	THOC2	1	0.637014
CSF3R	1117	CSF3R	1	0.640162
EHD3	1118	EHD3	1	0.640162
GDF3	1119	GDF3	3	0.640162
GGA2	1120	GGA2	1	0.640162
RBM22	1121	RBM22	1	0.640162
SMG1	1122	SMG1	2	0.640162
XDH	1123	XDH	1	0.640162
ARHGAP19	1124	ARHGAP19	2	0.643222
BMP6	1125	BMP6	1	0.643222
CHD6	1126	CHD6	1	0.643222
IL1R1	1127	IL1R1	1	0.643222
PSMA2	1128	PSMA2	1	0.643222
RAPGEF4	1129	RAPGEF4	2	0.643222
SMG6	1130	SMG6	7	0.643222
ZNF791	1131	ZNF791	2	0.643222
CDH22	1132	CDH22	1	0.64659
CEP250	1133	CEP250	2	0.64659
FASN	1134	FASN	1	0.64659
MYH9	1135	MYH9	2	0.64659
MYO15A	1136	MYO15A	4	0.64659
SORBS1	1137	SORBS1	2	0.64659
ACOX1	1138	ACOX1	1	0.65009
ARHGAP25	1139	ARHGAP25	2	0.65009
CDH3	1140	CDH3	1	0.65009
FLT4	1141	FLT4	1	0.65009
HIF3A	1142	HIF3A	3	0.65009
KIAA0196	1143	KIAA0196	2	0.65009
LEPROT	1144	LEPROT	1	0.65009
NDUFB8	1145	NDUFB8	1	0.65009
AGPS	1146	AGPS	1	0.653238
CD3D	1147	CD3D	1	0.653238
CER1	1148	CER1	2	0.653238
EHD1	1149	EHD1	1	0.653238
FMO2	1150	FMO2	3	0.653238
ITGA8	1151	ITGA8	1	0.653238
JAG1	1152	JAG1	1	0.653238
NPBWR2	1153	NPBWR2	1	0.653238
ALDH1B1	1154	ALDH1B1	2	0.657355
ATP11B	1155	ATP11B	1	0.657355
CASP6	1156	CASP6	1	0.657355
CLDN18	1157	CLDN18	1	0.657355
HIST1H2BC	1158	HIST1H2BC	1	0.657355
IRF3	1159	IRF3	1	0.657355
JAK1	1160	JAK1	1	0.657355
LSM4	1161	LSM4	1	0.657355
NUPL1	1162	NUPL1	2	0.657355
TRIB3	1163	TRIB3	1	0.657355
CTSH	1164	CTSH	2	0.660811
DNAJC1	1165	DNAJC1	1	0.660811
GAS1	1166	GAS1	2	0.660811
KCTD20	1167	KCTD20	1	0.660811
MYO19	1168	MYO19	4	0.660811
PKMYT1	1169	PKMYT1	1	0.660811
RPL13	1170	RPL13	3	0.660811
SRA1	1171	SRA1	2	0.660811
BEX1	1172	BEX1	1	0.664377
CCL23	1173	CCL23	1	0.664377
HDAC3	1174	HDAC3	2	0.664377
HIST1H2BD	1175	HIST1H2BD	1	0.664377
LRP2	1176	LRP2	2	0.664377
NFIB	1177	NFIB	1	0.664377
PGM1	1178	PGM1	1	0.664377
RPL36AL	1179	RPL36AL	1	0.664377
WHSC1L1	1180	WHSC1L1	3	0.664377
ARHGAP4	1181	ARHGAP4	1	0.668582
CNOT1	1182	CNOT1	1	0.668582
DSP	1183	DSP	1	0.668582
HIST2H2AC	1184	HIST2H2AC	1	0.668582
IL23R	1185	IL23R	2	0.668582
KIR2DL1	1186	KIR2DL1	3	0.668582
TLL2	1187	TLL2	3	0.668582
TNFRSF21	1188	TNFRSF21	1	0.668582
WDR47	1189	WDR47	2	0.668582
CNTNAP2	1190	CNTNAP2	1	0.672038
KLHL9	1191	KLHL9	1	0.672038
PCM1	1192	PCM1	2	0.672038
SERPING1	1193	SERPING1	1	0.672038
SH3GL3	1194	SH3GL3	1	0.672038
FGD4	1195	FGD4	3	0.675868
GOLGA4	1196	GOLGA4	1	0.675868
PLA2G12B	1197	PLA2G12B	4	0.675868
SLC8A2	1198	SLC8A2	1	0.675868
TRHR	1199	TRHR	1	0.675868
CUBN	1200	CUBN	2	0.679369
GEMIN5	1201	GEMIN5	2	0.679369
HERC1	1202	HERC1	1	0.679369
MCM4	1203	MCM4	1	0.679369
NBN	1204	NBN	1	0.679369
PDCD1LG2	1205	PDCD1LG2	2	0.679369
TBCD	1206	TBCD	2	0.679369
VPS36	1207	VPS36	3	0.679369
CYTH4	1208	CYTH4	3	0.682561
FUCA1	1209	FUCA1	1	0.682561
HIST1H4L	1210	HIST1H4L	1	0.682561
HMGCS2	1211	HMGCS2	2	0.682561
ITGA2	1212	ITGA2	2	0.682561
ITGB8	1213	ITGB8	1	0.682561
MADCAM1	1214	MADCAM1	2	0.682561
MAP1B	1215	MAP1B	2	0.682561
MAPKAP1	1216	MAPKAP1	3	0.682561
PSMA6	1217	PSMA6	1	0.682561
TBC1D4	1218	TBC1D4	3	0.682561
TYK2	1219	TYK2	2	0.682561
ZMIZ1	1220	ZMIZ1	6	0.682561
CRAT	1221	CRAT	3	0.686391
CXCR2	1222	CXCR2	2	0.686391
EPB41L3	1223	EPB41L3	1	0.686391
FGG	1224	FGG	1	0.686391
GMPR	1225	GMPR	3	0.686391
HAP1	1226	HAP1	3	0.686391
HIST2H3D	1227	HIST2H3D	1	0.686391
IL1R2	1228	IL1R2	2	0.686391
LIG4	1229	LIG4	1	0.686391
PAK7	1230	PAK7	1	0.686391
TAS2R46	1231	TAS2R46	3	0.686391
ADH1B	1232	ADH1B	2	0.690552
AP1S1	1233	AP1S1	1	0.690552
CASC5	1234	CASC5	1	0.690552
FARSA	1235	FARSA	2	0.690552
LAMC1	1236	LAMC1	1	0.690552
MTTP	1237	MTTP	3	0.690552
PCSK5	1238	PCSK5	2	0.690552
PUF60	1239	PUF60	2	0.690552
SMAP2	1240	SMAP2	1	0.690552
AP1M1	1241	AP1M1	1	0.69447
CCNL2	1242	CCNL2	2	0.69447
CHMP4B	1243	CHMP4B	1	0.69447
GEMIN4	1244	GEMIN4	4	0.69447
HIST1H4B	1245	HIST1H4B	1	0.69447
IRS4	1246	IRS4	3	0.69447
ITSN1	1247	ITSN1	1	0.69447
2017-03-08	1248	2017-03-08	1	0.69447
MASP1	1249	MASP1	2	0.69447
MMP14	1250	MMP14	2	0.69447
NR2C2	1251	NR2C2	1	0.69447
PRDX1	1252	PRDX1	1	0.69447
TDRD7	1253	TDRD7	2	0.69447
VTN	1254	VTN	3	0.69447
ACP2	1255	ACP2	1	0.698609
CD209	1256	CD209	3	0.698609
CENPF	1257	CENPF	2	0.698609
CPB2	1258	CPB2	2	0.698609
CREM	1259	CREM	1	0.698609
DMBT1	1260	DMBT1	2	0.698609
DPM2	1261	DPM2	3	0.698609
FANCA	1262	FANCA	5	0.698609
HDAC5	1263	HDAC5	2	0.698609
LRP6	1264	LRP6	1	0.698609
SFTPA1	1265	SFTPA1	5	0.698609
XRCC1	1266	XRCC1	1	0.698609
XRN1	1267	XRN1	1	0.698609
APPL1	1268	APPL1	1	0.702857
FAS	1269	FAS	3	0.702857
MAFA	1270	MAFA	2	0.702857
NF1	1271	NF1	1	0.702857
PSD	1272	PSD	1	0.702857
RPS3A	1273	RPS3A	1	0.702857
SRP68	1274	SRP68	3	0.702857
TXNRD1	1275	TXNRD1	1	0.702857
ZNF623	1276	ZNF623	3	0.702857
ABCG2	1277	ABCG2	2	0.707216
ATP1B4	1278	ATP1B4	1	0.707216
CCR7	1279	CCR7	1	0.707216
FLT3LG	1280	FLT3LG	1	0.707216
GNB3	1281	GNB3	1	0.707216
HSPA5	1282	HSPA5	2	0.707216
SIKE1	1283	SIKE1	3	0.707216
C10orf118	1284	C10orf118	1	0.711421
GMNN	1285	GMNN	1	0.711421
MST4	1286	MST4	1	0.711421
PLAU	1287	PLAU	4	0.711421
PPP1R3A	1288	PPP1R3A	2	0.711421
SFI1	1289	SFI1	2	0.711421
TROVE2	1290	TROVE2	1	0.711421
ARCN1	1291	ARCN1	2	0.715868
ARSG	1292	ARSG	1	0.715868
EPN1	1293	EPN1	1	0.715868
LRP10	1294	LRP10	2	0.715868
LRPPRC	1295	LRPPRC	2	0.715868
NTF3	1296	NTF3	2	0.715868
PEX5	1297	PEX5	1	0.715868
RACGAP1	1298	RACGAP1	1	0.715868
TAS2R19	1299	TAS2R19	2	0.715868
AGL	1300	AGL	2	0.720116
AP4E1	1301	AP4E1	1	0.720116
DSG1	1302	DSG1	1	0.720116
GNRH2	1303	GNRH2	1	0.720116
IL12RB1	1304	IL12RB1	1	0.720116
IL17RB	1305	IL17RB	1	0.720116
INCENP	1306	INCENP	1	0.720116
RBL1	1307	RBL1	1	0.720116
RNF41	1308	RNF41	1	0.720116
RXRG	1309	RXRG	1	0.720116
STARD8	1310	STARD8	1	0.720116
TNKS2	1311	TNKS2	2	0.720116
APPBP2	1312	APPBP2	1	0.725201
CD68	1313	CD68	1	0.725201
CUL4A	1314	CUL4A	2	0.725201
CYFIP1	1315	CYFIP1	3	0.725201
HIST1H4J	1316	HIST1H4J	1	0.725201
KLRC1	1317	KLRC1	3	0.725201
MRPL41	1318	MRPL41	4	0.725201
MYCBP2	1319	MYCBP2	3	0.725201
NRXN1	1320	NRXN1	2	0.725201
PLEKHG2	1321	PLEKHG2	2	0.725201
RGS4	1322	RGS4	1	0.725201
TAS1R2	1323	TAS1R2	2	0.725201
TRIP10	1324	TRIP10	2	0.725201
TYMS	1325	TYMS	1	0.725201
USP2	1326	USP2	2	0.725201
VTA1	1327	VTA1	2	0.725201
WNT9A	1328	WNT9A	1	0.725201
AGA	1329	AGA	1	0.729802
CAPN6	1330	CAPN6	2	0.729802
CENPO	1331	CENPO	1	0.729802
CSF1	1332	CSF1	1	0.729802
EDNRB	1333	EDNRB	2	0.729802
ESPL1	1334	ESPL1	3	0.729802
GARNL3	1335	GARNL3	3	0.729802
HDAC7	1336	HDAC7	2	0.729802
MITF	1337	MITF	1	0.729802
NOD1	1338	NOD1	2	0.729802
SLAMF6	1339	SLAMF6	3	0.729802
TRIO	1340	TRIO	2	0.729802
GALC	1341	GALC	1	0.734491
KLK3	1342	KLK3	1	0.734491
SPTY2D1	1343	SPTY2D1	1	0.734491
TLR8	1344	TLR8	2	0.734491
UBE2O	1345	UBE2O	1	0.734491
ZNF28	1346	ZNF28	5	0.734491
ZW10	1347	ZW10	2	0.734491
ATG2B	1348	ATG2B	3	0.739753
CTSS	1349	CTSS	1	0.739753
DLGAP5	1350	DLGAP5	2	0.739753
DNASE2B	1351	DNASE2B	1	0.739753
NAGA	1352	NAGA	1	0.739753
TH	1353	TH	1	0.739753
CCT5	1354	CCT5	1	0.744574
CDT1	1355	CDT1	3	0.744574
COL6A3	1356	COL6A3	4	0.744574
CUL2	1357	CUL2	1	0.744574
EPO	1358	EPO	1	0.744574
HDAC11	1359	HDAC11	2	0.744574
PLA2G4F	1360	PLA2G4F	1	0.744574
RBPJ	1361	RBPJ	1	0.744574
RHOB	1362	RHOB	1	0.744574
SLC12A2	1363	SLC12A2	1	0.744574
SPATA13	1364	SPATA13	2	0.744574
XIAP	1365	XIAP	1	0.744574
ZBTB26	1366	ZBTB26	2	0.744574
ABCA3	1367	ABCA3	2	0.749174
ABCG5	1368	ABCG5	1	0.749174
ACACB	1369	ACACB	1	0.749174
FZD8	1370	FZD8	1	0.749174
HFE2	1371	HFE2	1	0.749174
ID2	1372	ID2	1	0.749174
IFNGR1	1373	IFNGR1	1	0.749174
NRBF2	1374	NRBF2	4	0.749174
PCSK4	1375	PCSK4	2	0.749174
PODXL	1376	PODXL	5	0.749174
RPL26	1377	RPL26	1	0.749174
TAB1	1378	TAB1	1	0.749174
ZFPM1	1379	ZFPM1	3	0.749174
ARHGDIA	1380	ARHGDIA	1	0.753841
CDK5RAP2	1381	CDK5RAP2	3	0.753841
COL4A5	1382	COL4A5	1	0.753841
CREB3L3	1383	CREB3L3	4	0.753841
DNAH6	1384	DNAH6	1	0.753841
NCAN	1385	NCAN	3	0.753841
ODC1	1386	ODC1	1	0.753841
STX4	1387	STX4	1	0.753841
ZBTB38	1388	ZBTB38	1	0.753841
CENPI	1389	CENPI	1	0.758376
COL11A2	1390	COL11A2	3	0.758376
ECT2	1391	ECT2	1	0.758376
F13A1	1392	F13A1	1	0.758376
GADD45GIP1	1393	GADD45GIP1	1	0.758376
ICOS	1394	ICOS	1	0.758376
LAMB1	1395	LAMB1	3	0.758376
MED4	1396	MED4	3	0.758376
NOTCH3	1397	NOTCH3	1	0.758376
PARP2	1398	PARP2	1	0.758376
PLXNA2	1399	PLXNA2	2	0.758376
REV1	1400	REV1	1	0.758376
SLC16A1	1401	SLC16A1	1	0.758376
SPOP	1402	SPOP	2	0.758376
STX1A	1403	STX1A	1	0.758376
UNC5A	1404	UNC5A	1	0.758376
CACNA2D4	1405	CACNA2D4	2	0.763704
COL4A3	1406	COL4A3	3	0.763704
DLG1	1407	DLG1	1	0.763704
EME1	1408	EME1	3	0.763704
KIAA1432	1409	KIAA1432	4	0.763704
LCMT1	1410	LCMT1	1	0.763704
OSMR	1411	OSMR	1	0.763704
PEX10	1412	PEX10	1	0.763704
PKN3	1413	PKN3	4	0.763704
PLA2G5	1414	PLA2G5	1	0.763704
PLD1	1415	PLD1	1	0.763704
PLEKHA7	1416	PLEKHA7	2	0.763704
TRAPPC2L	1417	TRAPPC2L	4	0.763704
ZNF292	1418	ZNF292	1	0.763704
ARHGEF16	1419	ARHGEF16	1	0.769009
CD84	1420	CD84	3	0.769009
CNOT7	1421	CNOT7	1	0.769009
COL4A1	1422	COL4A1	1	0.769009
DHX36	1423	DHX36	2	0.769009
DOK6	1424	DOK6	3	0.769009
DYNC1H1	1425	DYNC1H1	1	0.769009
EFNA2	1426	EFNA2	2	0.769009
HGSNAT	1427	HGSNAT	1	0.769009
MAGI2	1428	MAGI2	2	0.769009
MYH4	1429	MYH4	1	0.769009
NRP1	1430	NRP1	1	0.769009
PPIE	1431	PPIE	1	0.769009
SALL1	1432	SALL1	3	0.769009
SLIT2	1433	SLIT2	1	0.769009
SP4	1434	SP4	2	0.769009
YY1	1435	YY1	1	0.769009
ARHGEF17	1436	ARHGEF17	1	0.773764
CYP2C19	1437	CYP2C19	3	0.773764
DOCK2	1438	DOCK2	1	0.773764
FANCD2	1439	FANCD2	3	0.773764
FGA	1440	FGA	1	0.773764
GSTK1	1441	GSTK1	1	0.773764
IQGAP1	1442	IQGAP1	1	0.773764
LAMB3	1443	LAMB3	1	0.773764
MLF1IP	1444	MLF1IP	1	0.773764
PLXNB3	1445	PLXNB3	2	0.773764
PRKCI	1446	PRKCI	1	0.773764
SERPINF2	1447	SERPINF2	3	0.773764
SETDB2	1448	SETDB2	3	0.773764
TCP11L2	1449	TCP11L2	1	0.773764
TJP1	1450	TJP1	1	0.773764
UNC5C	1451	UNC5C	1	0.773764
WNT5B	1452	WNT5B	1	0.773764
ABLIM2	1453	ABLIM2	1	0.779532
ADAR	1454	ADAR	2	0.779532
FOXF1	1455	FOXF1	3	0.779532
MAML2	1456	MAML2	1	0.779532
MYPN	1457	MYPN	5	0.779532
NCKAP1L	1458	NCKAP1L	2	0.779532
NEUROG3	1459	NEUROG3	4	0.779532
PTPRF	1460	PTPRF	1	0.779532
RPL11	1461	RPL11	1	0.779532
SEMA6A	1462	SEMA6A	1	0.779532
SEMA6B	1463	SEMA6B	3	0.779532
SEMA6D	1464	SEMA6D	2	0.779532
SYT12	1465	SYT12	2	0.779532
UGT1A9	1466	UGT1A9	3	0.779532
FHL1	1467	FHL1	2	0.784397
MMP2	1468	MMP2	1	0.784397
MYO7B	1469	MYO7B	2	0.784397
PARP14	1470	PARP14	1	0.784397
RHOV	1471	RHOV	1	0.784397
SECISBP2L	1472	SECISBP2L	2	0.784397
CAMKK2	1473	CAMKK2	2	0.789988
CFB	1474	CFB	1	0.789988
HSPA4	1475	HSPA4	2	0.789988
MCC	1476	MCC	1	0.789988
MYO5B	1477	MYO5B	3	0.789988
NFAT5	1478	NFAT5	1	0.789988
NRAP	1479	NRAP	5	0.789988
PC	1480	PC	1	0.789988
POLE3	1481	POLE3	2	0.789988
SDCCAG8	1482	SDCCAG8	1	0.789988
SHARPIN	1483	SHARPIN	3	0.789988
SLC25A13	1484	SLC25A13	2	0.789988
SNURF	1485	SNURF	1	0.789988
SPEN	1486	SPEN	2	0.789988
SUGT1	1487	SUGT1	4	0.789988
ZBP1	1488	ZBP1	1	0.789988
ABLIM1	1489	ABLIM1	1	0.795183
ACD	1490	ACD	2	0.795183
CNOT10	1491	CNOT10	1	0.795183
CYP21A2	1492	CYP21A2	1	0.795183
DENND4C	1493	DENND4C	3	0.795183
DIAPH3	1494	DIAPH3	3	0.795183
FAF1	1495	FAF1	1	0.795183
GLUD1	1496	GLUD1	4	0.795183
NHLRC1	1497	NHLRC1	1	0.795183
NLRC4	1498	NLRC4	2	0.795183
NT5E	1499	NT5E	1	0.795183
PLAT	1500	PLAT	1	0.795183
PREX1	1501	PREX1	1	0.795183
ROBO1	1502	ROBO1	1	0.795183
SKIV2L	1503	SKIV2L	1	0.795183
TLR7	1504	TLR7	2	0.795183
TNNT2	1505	TNNT2	1	0.795183
VDAC2	1506	VDAC2	4	0.795183
ATP6V1G2	1507	ATP6V1G2	1	0.800907
CDK10	1508	CDK10	3	0.800907
DLAT	1509	DLAT	1	0.800907
EIF4E2	1510	EIF4E2	3	0.800907
HTR2A	1511	HTR2A	2	0.800907
MDC1	1512	MDC1	1	0.800907
MED23	1513	MED23	1	0.800907
NCAPD2	1514	NCAPD2	1	0.800907
RB1CC1	1515	RB1CC1	2	0.800907
SMC2	1516	SMC2	3	0.800907
ZCCHC11	1517	ZCCHC11	1	0.800907
ABCB1	1518	ABCB1	2	0.806653
ATP6V1E1	1519	ATP6V1E1	1	0.806653
BUD31	1520	BUD31	1	0.806653
CEP55	1521	CEP55	3	0.806653
CPE	1522	CPE	1	0.806653
DMD	1523	DMD	1	0.806653
EXOSC10	1524	EXOSC10	1	0.806653
FAM78A	1525	FAM78A	5	0.806653
FARP2	1526	FARP2	3	0.806653
HDAC8	1527	HDAC8	1	0.806653
IQGAP3	1528	IQGAP3	1	0.806653
KAT2A	1529	KAT2A	1	0.806653
MKI67	1530	MKI67	7	0.806653
NR0B1	1531	NR0B1	1	0.806653
PFKM	1532	PFKM	1	0.806653
PIK3C3	1533	PIK3C3	1	0.806653
SERPINB4	1534	SERPINB4	2	0.806653
SGOL2	1535	SGOL2	1	0.806653
SOCS6	1536	SOCS6	2	0.806653
STX17	1537	STX17	2	0.806653
ARHGEF4	1538	ARHGEF4	1	0.812486
ASNS	1539	ASNS	2	0.812486
BCOR	1540	BCOR	1	0.812486
CPA3	1541	CPA3	1	0.812486
DICER1	1542	DICER1	6	0.812486
DNALI1	1543	DNALI1	3	0.812486
EPN2	1544	EPN2	1	0.812486
GLI2	1545	GLI2	2	0.812486
MCF2	1546	MCF2	1	0.812486
MMP8	1547	MMP8	1	0.812486
MST1R	1548	MST1R	4	0.812486
NUMB	1549	NUMB	1	0.812486
RIT1	1550	RIT1	2	0.812486
SGCG	1551	SGCG	2	0.812486
SH2D2A	1552	SH2D2A	1	0.812486
VAMP2	1553	VAMP2	1	0.812486
BMP4	1554	BMP4	1	0.818342
CLSPN	1555	CLSPN	1	0.818342
CYBA	1556	CYBA	4	0.818342
DNAJC17	1557	DNAJC17	2	0.818342
ENGASE	1558	ENGASE	3	0.818342
GSTP1	1559	GSTP1	1	0.818342
JAG2	1560	JAG2	1	0.818342
PGD	1561	PGD	1	0.818342
SDC4	1562	SDC4	1	0.818342
SH2D3C	1563	SH2D3C	3	0.818342
SNAI2	1564	SNAI2	1	0.818342
STON1	1565	STON1	2	0.818342
SYDE1	1566	SYDE1	2	0.818342
TCF12	1567	TCF12	1	0.818342
TNNI3	1568	TNNI3	1	0.818342
TUBGCP2	1569	TUBGCP2	1	0.818342
UBC	1570	UBC	1	0.818342
USHBP1	1571	USHBP1	2	0.818342
ZNF318	1572	ZNF318	1	0.818342
CCNT2	1573	CCNT2	1	0.824528
CD180	1574	CD180	1	0.824528
CEP290	1575	CEP290	1	0.824528
CNOT3	1576	CNOT3	1	0.824528
FASTK	1577	FASTK	1	0.824528
GPD1	1578	GPD1	1	0.824528
MED16	1579	MED16	2	0.824528
MMRN1	1580	MMRN1	1	0.824528
MPEG1	1581	MPEG1	2	0.824528
NCAM2	1582	NCAM2	1	0.824528
NT5C	1583	NT5C	1	0.824528
NUDT12	1584	NUDT12	1	0.824528
PTCH1	1585	PTCH1	2	0.824528
PTPRZ1	1586	PTPRZ1	3	0.824528
RFFL	1587	RFFL	1	0.824528
SLC1A6	1588	SLC1A6	3	0.824528
SLC30A6	1589	SLC30A6	1	0.824528
SRPR	1590	SRPR	1	0.824528
ADCK5	1591	ADCK5	4	0.830494
ATP1A2	1592	ATP1A2	1	0.830494
CEP57	1593	CEP57	1	0.830494
CYP2S1	1594	CYP2S1	1	0.830494
DNM1	1595	DNM1	4	0.830494
EXOSC1	1596	EXOSC1	1	0.830494
IMPDH2	1597	IMPDH2	2	0.830494
MARS2	1598	MARS2	1	0.830494
MARS	1599	MARS	1	0.830494
MYO7A	1600	MYO7A	2	0.830494
PYGL	1601	PYGL	2	0.830494
SLC7A5	1602	SLC7A5	3	0.830494
TBK1	1603	TBK1	1	0.830494
ACAT2	1604	ACAT2	1	0.835843
BLM	1605	BLM	1	0.835843
CD200R1	1606	CD200R1	3	0.835843
CDK9	1607	CDK9	3	0.835843
DIAPH1	1608	DIAPH1	1	0.835843
F11	1609	F11	2	0.835843
GADD45B	1610	GADD45B	2	0.835843
GDI2	1611	GDI2	1	0.835843
GRIK2	1612	GRIK2	1	0.835843
IARS2	1613	IARS2	1	0.835843
MAGI1	1614	MAGI1	2	0.835843
MAPKAPK3	1615	MAPKAPK3	1	0.835843
MBD3	1616	MBD3	2	0.835843
OPLAH	1617	OPLAH	2	0.835843
PAX5	1618	PAX5	3	0.835843
PLEK	1619	PLEK	2	0.835843
PRF1	1620	PRF1	4	0.835843
PTAR1	1621	PTAR1	1	0.835843
PTPRO	1622	PTPRO	2	0.835843
RAP1B	1623	RAP1B	1	0.835843
SEC11A	1624	SEC11A	1	0.835843
SNRNP35	1625	SNRNP35	1	0.835843
UGCG	1626	UGCG	2	0.835843
VANGL2	1627	VANGL2	1	0.835843
AKAP8	1628	AKAP8	2	0.842051
CHRD	1629	CHRD	1	0.842051
CYP2B6	1630	CYP2B6	1	0.842051
DBH	1631	DBH	4	0.842051
FARS2	1632	FARS2	1	0.842051
HCCS	1633	HCCS	1	0.842051
ICAM3	1634	ICAM3	3	0.842051
MAPK4	1635	MAPK4	2	0.842051
MSRB2	1636	MSRB2	1	0.842051
MYO5A	1637	MYO5A	1	0.842051
NFASC	1638	NFASC	1	0.842051
NLRX1	1639	NLRX1	4	0.842051
PAOX	1640	PAOX	1	0.842051
PILRB	1641	PILRB	2	0.842051
RASGRP1	1642	RASGRP1	2	0.842051
SMARCC1	1643	SMARCC1	1	0.842051
SPARCL1	1644	SPARCL1	4	0.842051
TPM3	1645	TPM3	1	0.842051
AFAP1L1	1646	AFAP1L1	2	0.848061
ATP6V1B1	1647	ATP6V1B1	1	0.848061
BCAT1	1648	BCAT1	1	0.848061
CYP2E1	1649	CYP2E1	1	0.848061
CYP3A43	1650	CYP3A43	1	0.848061
DCTN3	1651	DCTN3	1	0.848061
EGF	1652	EGF	1	0.848061
EXOSC5	1653	EXOSC5	1	0.848061
FAM161B	1654	FAM161B	2	0.848061
IDE	1655	IDE	2	0.848061
IMMP2L	1656	IMMP2L	2	0.848061
KARS	1657	KARS	1	0.848061
LY9	1658	LY9	3	0.848061
NCKAP1	1659	NCKAP1	1	0.848061
NT5C1A	1660	NT5C1A	1	0.848061
PA2G4	1661	PA2G4	1	0.848061
PFN1	1662	PFN1	2	0.848061
PHF3	1663	PHF3	1	0.848061
PRICKLE1	1664	PRICKLE1	1	0.848061
SETD1A	1665	SETD1A	1	0.848061
SETD7	1666	SETD7	1	0.848061
SIN3B	1667	SIN3B	1	0.848061
STX10	1668	STX10	2	0.848061
ACVR2B	1669	ACVR2B	1	0.854731
AURKB	1670	AURKB	1	0.854731
BAI1	1671	BAI1	2	0.854731
C11orf30	1672	C11orf30	1	0.854731
CARS2	1673	CARS2	1	0.854731
CCDC130	1674	CCDC130	2	0.854731
DARS	1675	DARS	1	0.854731
FGFR1OP	1676	FGFR1OP	1	0.854731
IRF5	1677	IRF5	2	0.854731
LCT	1678	LCT	2	0.854731
MMP24	1679	MMP24	1	0.854731
MYO1C	1680	MYO1C	2	0.854731
NR6A1	1681	NR6A1	5	0.854731
PVRL4	1682	PVRL4	1	0.854731
RPA1	1683	RPA1	1	0.854731
RPS6KA1	1684	RPS6KA1	1	0.854731
SELE	1685	SELE	1	0.854731
SLC34A2	1686	SLC34A2	2	0.854731
SPATA6	1687	SPATA6	1	0.854731
TGFBRAP1	1688	TGFBRAP1	1	0.854731
TGS1	1689	TGS1	1	0.854731
TRAF3IP3	1690	TRAF3IP3	1	0.854731
USP51	1691	USP51	1	0.854731
ALCAM	1692	ALCAM	2	0.860939
CD79A	1693	CD79A	1	0.860939
DDO	1694	DDO	1	0.860939
DTX1	1695	DTX1	1	0.860939
FGFR1	1696	FGFR1	1	0.860939
GARS	1697	GARS	1	0.860939
GNPNAT1	1698	GNPNAT1	1	0.860939
GRIK3	1699	GRIK3	1	0.860939
MED31	1700	MED31	3	0.860939
NDUFA8	1701	NDUFA8	2	0.860939
NES	1702	NES	4	0.860939
PEX7	1703	PEX7	1	0.860939
PLXNB2	1704	PLXNB2	3	0.860939
PSIP1	1705	PSIP1	1	0.860939
PTPN12	1706	PTPN12	2	0.860939
RPS6KB2	1707	RPS6KB2	1	0.860939
2017-09-05	1708	2017-09-05	1	0.860939
SLC25A12	1709	SLC25A12	1	0.860939
SPIRE2	1710	SPIRE2	3	0.860939
STIL	1711	STIL	2	0.860939
TAS2R9	1712	TAS2R9	1	0.860939
THBS2	1713	THBS2	1	0.860939
TJP3	1714	TJP3	2	0.860939
TRPM5	1715	TRPM5	1	0.860939
VANGL1	1716	VANGL1	1	0.860939
WASF3	1717	WASF3	3	0.860939
ZDHHC20	1718	ZDHHC20	1	0.860939
ALDH1L1	1719	ALDH1L1	5	0.867477
ANGPTL4	1720	ANGPTL4	3	0.867477
CENPP	1721	CENPP	1	0.867477
DHCR24	1722	DHCR24	1	0.867477
FAM179B	1723	FAM179B	2	0.867477
GATC	1724	GATC	1	0.867477
HTR2C	1725	HTR2C	1	0.867477
NT5M	1726	NT5M	1	0.867477
PEX1	1727	PEX1	1	0.867477
PITPNA	1728	PITPNA	2	0.867477
PTPRN2	1729	PTPRN2	5	0.867477
RAB27A	1730	RAB27A	1	0.867477
RAP1GAP	1731	RAP1GAP	1	0.867477
SKA3	1732	SKA3	4	0.867477
SPC24	1733	SPC24	1	0.867477
TEP1	1734	TEP1	8	0.867477
ABCA13	1735	ABCA13	1	0.874961
ABCC4	1736	ABCC4	1	0.874961
ABCC6	1737	ABCC6	1	0.874961
BCHE	1738	BCHE	2	0.874961
CA5A	1739	CA5A	3	0.874961
DDX3Y	1740	DDX3Y	1	0.874961
EPS8	1741	EPS8	1	0.874961
FCRL3	1742	FCRL3	4	0.874961
FKBP8	1743	FKBP8	2	0.874961
G6PC2	1744	G6PC2	1	0.874961
HDAC10	1745	HDAC10	1	0.874961
HS6ST1	1746	HS6ST1	2	0.874961
LTBP1	1747	LTBP1	1	0.874961
MAPK11	1748	MAPK11	1	0.874961
MAPK15	1749	MAPK15	2	0.874961
MYBPC2	1750	MYBPC2	2	0.874961
PFAS	1751	PFAS	2	0.874961
PGR	1752	PGR	1	0.874961
RELN	1753	RELN	2	0.874961
SCD5	1754	SCD5	1	0.874961
SENP2	1755	SENP2	1	0.874961
SERPINE1	1756	SERPINE1	1	0.874961
SMO	1757	SMO	1	0.874961
SRRM2	1758	SRRM2	5	0.874961
TF	1759	TF	1	0.874961
TMLHE	1760	TMLHE	1	0.874961
UBASH3A	1761	UBASH3A	1	0.874961
UXT	1762	UXT	1	0.874961
VTI1A	1763	VTI1A	1	0.874961
XPO4	1764	XPO4	2	0.874961
AHCTF1	1765	AHCTF1	1	0.88249
AKAP11	1766	AKAP11	1	0.88249
ARID1A	1767	ARID1A	1	0.88249
BMP10	1768	BMP10	1	0.88249
C7orf59	1769	C7orf59	1	0.88249
CEP152	1770	CEP152	1	0.88249
CNTF	1771	CNTF	1	0.88249
DECR2	1772	DECR2	1	0.88249
DSCAM	1773	DSCAM	1	0.88249
ITPA	1774	ITPA	1	0.88249
MCM2	1775	MCM2	1	0.88249
NDUFB6	1776	NDUFB6	1	0.88249
NUDT9	1777	NUDT9	1	0.88249
PARVG	1778	PARVG	1	0.88249
PRKAG2	1779	PRKAG2	1	0.88249
PTPN22	1780	PTPN22	1	0.88249
RSPH3	1781	RSPH3	1	0.88249
STAR	1782	STAR	1	0.88249
TLR10	1783	TLR10	1	0.88249
USF1	1784	USF1	1	0.88249
ADAM12	1785	ADAM12	1	0.890459
CHD3	1786	CHD3	4	0.890459
CHRDL1	1787	CHRDL1	1	0.890459
CLPX	1788	CLPX	1	0.890459
COX7A2	1789	COX7A2	1	0.890459
CYP2F1	1790	CYP2F1	1	0.890459
DLD	1791	DLD	1	0.890459
EEA1	1792	EEA1	1	0.890459
ENTPD1	1793	ENTPD1	2	0.890459
EWSR1	1794	EWSR1	2	0.890459
FBN1	1795	FBN1	4	0.890459
FECH	1796	FECH	1	0.890459
GDF2	1797	GDF2	1	0.890459
GNAT3	1798	GNAT3	1	0.890459
GNG10	1799	GNG10	2	0.890459
HTR7	1800	HTR7	3	0.890459
LPP	1801	LPP	2	0.890459
MTDH	1802	MTDH	1	0.890459
MYO5C	1803	MYO5C	1	0.890459
NARFL	1804	NARFL	1	0.890459
NDUFA9	1805	NDUFA9	1	0.890459
NODAL	1806	NODAL	5	0.890459
NTRK3	1807	NTRK3	1	0.890459
RBM6	1808	RBM6	2	0.890459
RNF125	1809	RNF125	1	0.890459
SNX15	1810	SNX15	1	0.890459
SP140	1811	SP140	2	0.890459
TAF2	1812	TAF2	1	0.890459
TRIM24	1813	TRIM24	2	0.890459
VAMP3	1814	VAMP3	1	0.890459
VARS2	1815	VARS2	1	0.890459
CPS1	1816	CPS1	1	0.898802
CR2	1817	CR2	1	0.898802
ELSPBP1	1818	ELSPBP1	3	0.898802
GPATCH8	1819	GPATCH8	1	0.898802
GSR	1820	GSR	2	0.898802
LDLRAD3	1821	LDLRAD3	2	0.898802
LILRB3	1822	LILRB3	1	0.898802
LIPE	1823	LIPE	1	0.898802
PSMB6	1824	PSMB6	1	0.898802
PXMP2	1825	PXMP2	1	0.898802
RPS24	1826	RPS24	4	0.898802
STATH	1827	STATH	1	0.898802
TAF5L	1828	TAF5L	1	0.898802
TAS2R31	1829	TAS2R31	1	0.898802
TAS2R4	1830	TAS2R4	1	0.898802
TAS2R7	1831	TAS2R7	1	0.898802
TBXA2R	1832	TBXA2R	2	0.898802
TUBAL3	1833	TUBAL3	1	0.898802
YWHAG	1834	YWHAG	1	0.898802
ABCB5	1835	ABCB5	1	0.906243
ABCB6	1836	ABCB6	2	0.906243
ADK	1837	ADK	5	0.906243
C4BPA	1838	C4BPA	1	0.906243
CLDN7	1839	CLDN7	1	0.906243
DGAT1	1840	DGAT1	3	0.906243
HK2	1841	HK2	1	0.906243
HRG	1842	HRG	2	0.906243
MED13	1843	MED13	1	0.906243
MUC17	1844	MUC17	23	0.906243
