# Supplementary material for: DriverFinder: A Gene Length-Based Network Method to Identify Cancer Driver Genes
Source: Hindawi journal article supplement (doi:10.1155/2017/4826206), 2017-01-01
Supplement: f2 [file 4826206.f2.xlsx]

## Sheet: BRCA
Table S1 The enriched KEGG pathways in BRCA
Category	Term	Count	%	PValue	Genes	List Total	Pop Hits	Pop Total	Fold Enrichment	Bonferroni	Benjamini	FDR
KEGG_PATHWAY	hsa05222:Small cell lung cancer	9	40.9091	2.58e-10	CCNE1, CCND1, CDKN1B, PIK3CA, RB1, IKBKB, MYC, PTEN, AKT3	20	84	5085	27.2411	1.68e-08	1.68e-08	2.63e-07
KEGG_PATHWAY	hsa05215:Prostate cancer	9	40.9091	4.14e-10	CCNE1, CCND1, CDKN1B, ERBB2, PIK3CA, RB1, IKBKB, PTEN, AKT3	20	89	5085	25.7107	2.69e-08	1.34e-08	4.22e-07
KEGG_PATHWAY	hsa05200:Pathways in cancer	11	50	5.97e-08	CCNE1, CCND1, CDKN1B, ERBB2, PIK3CA, RB1, IKBKB, MYC, PTEN, AKT3, FH	20	328	5085	8.52668	3.88e-06	1.29e-06	6.09e-05
KEGG_PATHWAY	hsa05220:Chronic myeloid leukemia	7	31.8182	1.96e-07	CCND1, CDKN1B, PIK3CA, RB1, IKBKB, MYC, AKT3	20	75	5085	23.73	1.27e-05	3.18e-06	0.0002
KEGG_PATHWAY	hsa04012:ErbB signaling pathway	7	31.8182	4.79e-07	CDKN1B, ERBB2, MAP2K4, PIK3CA, PAK1, MYC, AKT3	20	87	5085	20.4569	3.11e-05	6.22e-06	0.000488
KEGG_PATHWAY	hsa05213:Endometrial cancer	6	27.2727	9.59e-07	CCND1, ERBB2, PIK3CA, MYC, PTEN, AKT3	20	52	5085	29.3365	6.23e-05	1.04e-05	0.000977
KEGG_PATHWAY	hsa05212:Pancreatic cancer	6	27.2727	4.93e-06	CCND1, ERBB2, PIK3CA, RB1, IKBKB, AKT3	20	72	5085	21.1875	0.00032	4.58e-05	0.00502426
KEGG_PATHWAY	hsa05223:Non-small cell lung cancer	5	22.7273	3.91e-05	CCND1, ERBB2, PIK3CA, RB1, AKT3	20	54	5085	23.5417	0.0025405	0.000318	0.0398777
KEGG_PATHWAY	hsa05221:Acute myeloid leukemia	5	22.7273	5.2e-05	CCND1, PIK3CA, IKBKB, MYC, AKT3	20	58	5085	21.9181	0.00337466	0.000376	0.05299
KEGG_PATHWAY	hsa05214:Glioma	5	22.7273	7.22e-05	CCND1, PIK3CA, RB1, PTEN, AKT3	20	63	5085	20.1786	0.00467905	0.000469	0.0735124
KEGG_PATHWAY	hsa05218:Melanoma	5	22.7273	0.000115	CCND1, PIK3CA, RB1, PTEN, AKT3	20	71	5085	17.9049	0.00747841	0.000682	0.117633
KEGG_PATHWAY	hsa05219:Bladder cancer	4	18.1818	0.000463	CCND1, ERBB2, RB1, MYC	20	42	5085	24.2143	0.0296655	0.00250639	0.47108
KEGG_PATHWAY	hsa04510:Focal adhesion	6	27.2727	0.000678	CCND1, ERBB2, PIK3CA, PAK1, PTEN, AKT3	20	201	5085	7.58955	0.0431514	0.00338733	0.689258
KEGG_PATHWAY	hsa04110:Cell cycle	5	22.7273	0.001013	CCNE1, CCND1, CDKN1B, RB1, MYC	20	125	5085	10.17	0.0637554	0.00469456	1.02766
KEGG_PATHWAY	hsa05211:Renal cell carcinoma	4	18.1818	0.0020672	PIK3CA, PAK1, AKT3, FH	20	70	5085	14.5286	0.125853	0.00892707	2.08698
KEGG_PATHWAY	hsa05210:Colorectal cancer	4	18.1818	0.00348122	CCND1, PIK3CA, MYC, AKT3	20	84	5085	12.1071	0.202819	0.0140672	3.49182
KEGG_PATHWAY	hsa04620:Toll-like receptor signaling pathway	4	18.1818	0.0058489	MAP2K4, PIK3CA, IKBKB, AKT3	20	101	5085	10.0693	0.317023	0.0221794	5.80347
KEGG_PATHWAY	hsa04660:T cell receptor signaling pathway	4	18.1818	0.00704775	PIK3CA, PAK1, IKBKB, AKT3	20	108	5085	9.41667	0.368543	0.0252169	6.9548
KEGG_PATHWAY	hsa04010:MAPK signaling pathway	5	22.7273	0.0154118	MAP2K4, PAK1, IKBKB, MYC, AKT3	20	267	5085	4.76124	0.635624	0.0517482	14.6406
KEGG_PATHWAY	hsa04630:Jak-STAT signaling pathway	4	18.1818	0.0188059	CCND1, PIK3CA, MYC, AKT3	20	155	5085	6.56129	0.708881	0.0598362	17.5925
KEGG_PATHWAY	hsa04115:p53 signaling pathway	3	13.6364	0.0260249	CCNE1, CCND1, PTEN	20	68	5085	11.2169	0.81986	0.078378	23.5672
KEGG_PATHWAY	hsa05120:Epithelial cell signaling in Helicobacter pylori infection	3	13.6364	0.0260249	MAP2K4, PAK1, IKBKB	20	68	5085	11.2169	0.81986	0.078378	23.5672
KEGG_PATHWAY	hsa04062:Chemokine signaling pathway	4	18.1818	0.0307256	PIK3CA, PAK1, IKBKB, AKT3	20	187	5085	5.4385	0.868466	0.088081	27.2446
KEGG_PATHWAY	hsa04662:B cell receptor signaling pathway	3	13.6364	0.0312161	PIK3CA, IKBKB, AKT3	20	75	5085	10.17	0.872723	0.0857267	27.6189
KEGG_PATHWAY	hsa04664:Fc epsilon RI signaling pathway	3	13.6364	0.0335578	MAP2K4, PIK3CA, AKT3	20	78	5085	9.77885	0.891249	0.0883013	29.3824
KEGG_PATHWAY	hsa04210:Apoptosis	3	13.6364	0.0409828	PIK3CA, IKBKB, AKT3	20	87	5085	8.76724	0.934126	0.10309	34.7207
KEGG_PATHWAY	hsa04666:Fc gamma R-mediated phagocytosis	3	13.6364	0.0480595	PIK3CA, PAK1, AKT3	20	95	5085	8.02895	0.959296	0.115853	39.4671
KEGG_PATHWAY	hsa04722:Neurotrophin signaling pathway	3	13.6364	0.0770165	PIK3CA, IKBKB, AKT3	20	124	5085	6.15121	0.994535	0.175468	55.8168
KEGG_PATHWAY	hsa04910:Insulin signaling pathway	3	13.6364	0.0891733	PIK3CA, IKBKB, AKT3	20	135	5085	5.65	0.997692	0.194931	61.4015

## Sheet: HNSC
Table S2 The enriched KEGG pathways in HNSC
Category	Term	Count	%	PValue	Genes	List Total	Pop Hits	Pop Total	Fold Enrichment	Bonferroni	Benjamini	FDR
KEGG_PATHWAY	hsa05215:Prostate cancer	10	20.8333	6.63e-08	E2F1, EGFR, AKT1, NRAS, HRAS, HSP90AA1, EP300, CREBBP, TP53, PIK3CA	47	89	5085	12.1563	7.83e-06	7.83e-06	7.59e-05
KEGG_PATHWAY	hsa05223:Non-small cell lung cancer	8	16.6667	3.97e-07	E2F1, EGFR, AKT1, NRAS, HRAS, CDKN2A, TP53, PIK3CA	47	54	5085	16.0284	4.69e-05	2.34e-05	0.000455
KEGG_PATHWAY	hsa05214:Glioma	8	16.6667	1.17e-06	E2F1, EGFR, AKT1, NRAS, HRAS, CDKN2A, TP53, PIK3CA	47	63	5085	13.7386	0.000138	4.59e-05	0.00133656
KEGG_PATHWAY	hsa05218:Melanoma	8	16.6667	2.66e-06	E2F1, EGFR, AKT1, NRAS, HRAS, CDKN2A, TP53, PIK3CA	47	71	5085	12.1906	0.000314	7.84e-05	0.00304333
KEGG_PATHWAY	hsa05200:Pathways in cancer	14	29.1667	3.85e-06	E2F1, EGFR, HRAS, HSP90AA1, CREBBP, TP53, FADD, AKT1, NRAS, EP300, CDKN2A, CASP8, RAC1, PIK3CA	47	328	5085	4.61793	0.000454	9.08e-05	0.00440295
KEGG_PATHWAY	hsa05219:Bladder cancer	6	12.5	3.21e-05	E2F1, EGFR, NRAS, HRAS, CDKN2A, TP53	47	42	5085	15.4559	0.00378429	0.000632	0.0367652
KEGG_PATHWAY	hsa05211:Renal cell carcinoma	7	14.5833	3.32e-05	AKT1, NRAS, HRAS, EP300, CREBBP, RAC1, PIK3CA	47	70	5085	10.8191	0.00391506	0.00056	0.0380381
KEGG_PATHWAY	hsa05212:Pancreatic cancer	7	14.5833	3.91e-05	E2F1, EGFR, AKT1, CDKN2A, RAC1, TP53, PIK3CA	47	72	5085	10.5186	0.00460079	0.000576	0.0447143
KEGG_PATHWAY	hsa04370:VEGF signaling pathway	7	14.5833	4.94e-05	AKT1, NRAS, HRAS, RAC1, PIK3CA, NOS3, NFATC1	47	75	5085	10.0979	0.00580653	0.000647	0.0564636
KEGG_PATHWAY	hsa05220:Chronic myeloid leukemia	7	14.5833	4.94e-05	E2F1, AKT1, NRAS, HRAS, CDKN2A, TP53, PIK3CA	47	75	5085	10.0979	0.00580653	0.000647	0.0564636
KEGG_PATHWAY	hsa05213:Endometrial cancer	6	12.5	9.18e-05	EGFR, AKT1, NRAS, HRAS, TP53, PIK3CA	47	52	5085	12.4836	0.0107707	0.00108232	0.104972
KEGG_PATHWAY	hsa04720:Long-term potentiation	6	12.5	0.00033	NRAS, HRAS, EP300, CREBBP, GRIN2A, PLCB1	47	68	5085	9.54631	0.0382507	0.00353931	0.377547
KEGG_PATHWAY	hsa04662:B cell receptor signaling pathway	6	12.5	0.000522	AKT1, NRAS, HRAS, RAC1, PIK3CA, NFATC1	47	75	5085	8.65532	0.0597495	0.00512093	0.595741
KEGG_PATHWAY	hsa04310:Wnt signaling pathway	7	14.5833	0.00217888	EP300, CREBBP, RAC1, TP53, PLCB1, CUL1, NFATC1	47	151	5085	5.0155	0.226932	0.0196044	2.46542
KEGG_PATHWAY	hsa04722:Neurotrophin signaling pathway	6	12.5	0.00489872	AKT1, NRAS, HRAS, RAC1, TP53, PIK3CA	47	124	5085	5.23507	0.439805	0.0405458	5.46505
KEGG_PATHWAY	hsa04110:Cell cycle	6	12.5	0.00506872	E2F1, CDKN2A, EP300, CREBBP, TP53, CUL1	47	125	5085	5.19319	0.450985	0.0391868	5.64971
KEGG_PATHWAY	hsa04664:Fc epsilon RI signaling pathway	5	10.4167	0.00513167	AKT1, NRAS, HRAS, RAC1, PIK3CA	47	78	5085	6.93535	0.455069	0.0372327	5.71801
KEGG_PATHWAY	hsa05016:Huntington's disease	7	14.5833	0.00522033	SDHA, NDUFB5, EP300, CREBBP, CASP8, TP53, PLCB1	47	180	5085	4.20745	0.46077	0.0356781	5.81412
KEGG_PATHWAY	hsa04062:Chemokine signaling pathway	7	14.5833	0.00627891	AKT1, NRAS, HRAS, RAC1, PIK3CA, GNB4, PLCB1	47	187	5085	4.04995	0.524433	0.0404506	6.9548
KEGG_PATHWAY	hsa04650:Natural killer cell mediated cytotoxicity	6	12.5	0.00658332	NRAS, HRAS, RAC1, HLA-A, PIK3CA, NFATC1	47	133	5085	4.88082	0.541319	0.0401911	7.28047
KEGG_PATHWAY	hsa05210:Colorectal cancer	5	10.4167	0.00667339	EGFR, AKT1, RAC1, TP53, PIK3CA	47	84	5085	6.43997	0.5462	0.0387348	7.37664
KEGG_PATHWAY	hsa04210:Apoptosis	5	10.4167	0.00754846	AKT1, CASP8, TP53, PIK3CA, FADD	47	87	5085	6.2179	0.591024	0.0416824	8.30618
KEGG_PATHWAY	hsa04012:ErbB signaling pathway	5	10.4167	0.00754846	EGFR, AKT1, NRAS, HRAS, PIK3CA	47	87	5085	6.2179	0.591024	0.0416824	8.30618
KEGG_PATHWAY	hsa04916:Melanogenesis	5	10.4167	0.0118005	NRAS, HRAS, EP300, CREBBP, PLCB1	47	99	5085	5.46422	0.753585	0.0616853	12.7028
KEGG_PATHWAY	hsa04620:Toll-like receptor signaling pathway	5	10.4167	0.0126326	AKT1, CASP8, RAC1, PIK3CA, FADD	47	101	5085	5.35601	0.776902	0.0631421	13.5405
KEGG_PATHWAY	hsa05010:Alzheimer's disease	6	12.5	0.0151015	SDHA, NDUFB5, CASP8, GRIN2A, FADD, PLCB1	47	163	5085	3.98251	0.833968	0.0720854	15.9826
KEGG_PATHWAY	hsa05221:Acute myeloid leukemia	4	8.33333	0.0151097	AKT1, NRAS, HRAS, PIK3CA	47	58	5085	7.46148	0.83413	0.0693406	15.9905
KEGG_PATHWAY	hsa04660:T cell receptor signaling pathway	5	10.4167	0.0158392	AKT1, NRAS, HRAS, PIK3CA, NFATC1	47	108	5085	5.00887	0.848018	0.0698981	16.7
KEGG_PATHWAY	hsa05216:Thyroid cancer	3	6.25	0.0278392	NRAS, HRAS, TP53	47	29	5085	11.1922	0.964265	0.116084	27.6114
KEGG_PATHWAY	hsa04520:Adherens junction	4	8.33333	0.0318128	EGFR, EP300, CREBBP, RAC1	47	77	5085	5.62034	0.977961	0.127373	30.9262
KEGG_PATHWAY	hsa05222:Small cell lung cancer	4	8.33333	0.0396741	E2F1, AKT1, TP53, PIK3CA	47	84	5085	5.15198	0.991578	0.151871	37.0795
KEGG_PATHWAY	hsa04810:Regulation of actin cytoskeleton	6	12.5	0.0432741	EGFR, NRAS, HRAS, F2, RAC1, PIK3CA	47	215	5085	3.0193	0.994593	0.159707	39.7267
KEGG_PATHWAY	hsa04540:Gap junction	4	8.33333	0.0458413	EGFR, NRAS, HRAS, PLCB1	47	89	5085	4.86254	0.996062	0.163575	41.5519
KEGG_PATHWAY	hsa04630:Jak-STAT signaling pathway	5	10.4167	0.0503537	AKT1, EP300, CREBBP, PIK3CA, GHR	47	155	5085	3.49005	0.997749	0.173469	44.6383
KEGG_PATHWAY	hsa04912:GnRH signaling pathway	4	8.33333	0.0580692	EGFR, NRAS, HRAS, PLCB1	47	98	5085	4.41598	0.999141	0.192582	49.573
KEGG_PATHWAY	hsa04330:Notch signaling pathway	3	6.25	0.0669393	NOTCH1, EP300, CREBBP	47	47	5085	6.90584	0.999719	0.213734	54.748
KEGG_PATHWAY	hsa05014:Amyotrophic lateral sclerosis (ALS)	3	6.25	0.0825012	RAC1, GRIN2A, TP53	47	53	5085	6.12405	0.999961	0.251956	62.6713
KEGG_PATHWAY	hsa00830:Retinol metabolism	3	6.25	0.0851953	CYP4A11, CYP3A5, UGT2B4	47	54	5085	6.01064	0.999973	0.253134	63.9067
KEGG_PATHWAY	hsa04010:MAPK signaling pathway	6	12.5	0.0914016	EGFR, AKT1, NRAS, HRAS, RAC1, TP53	47	267	5085	2.43127	0.999988	0.263385	66.6118

## Sheet: KIRC
Table S3 The enriched KEGG pathways in KIRC
Category	Term	Count	%	PValue	Genes	List Total	Pop Hits	Pop Total	Fold Enrichment	Bonferroni	Benjamini	FDR
KEGG_PATHWAY	hsa04912:GnRH signaling pathway	20	15.873	4.53e-13	EGFR, ADCY3, PLD1, ADCY2, ADCY8, MAP2K3, CAMK2G, PRKCD, CACNA1S, ITPR2, PLCB4, MAP3K4, ADCY9, SOS1, MAP3K1, GNAS, PRKACB, CACNA1C, PLCB2, PLA2G4E	120	98	5085	8.64796	7.29e-11	7.29e-11	5.47e-10
KEGG_PATHWAY	hsa05200:Pathways in cancer	31	24.6032	3.57e-11	FGFR1, FGFR3, ITGB1, PTEN, AKT1, SOS1, PIK3CA, PIK3R5, EGF, PIK3R1, AKT2, APC, PIK3CG, EGFR, PLD1, HSP90AA1, VHL, CREBBP, TP53, STAT1, LAMA1, CBLB, LAMA3, EP300, ITGA6, HDAC1, PDGFRA, JAK1, PTCH1, TCEB1, ABL1	120	328	5085	4.00495	5.75e-09	2.87e-09	4.31e-08
KEGG_PATHWAY	hsa05215:Prostate cancer	16	12.6984	1.27e-09	EGFR, PIK3CG, FGFR1, HSP90AA1, CREBBP, TP53, PTEN, AKT1, EP300, SOS1, PDGFRA, PIK3CA, PIK3R5, EGF, PIK3R1, AKT2	120	89	5085	7.61798	2.04e-07	6.81e-08	1.53e-06
KEGG_PATHWAY	hsa05214:Glioma	14	11.1111	1.27e-09	EGFR, PIK3CG, CAMK2G, TP53, PTEN, AKT1, SOS1, PDGFRA, PIK3CA, PIK3R5, SHC1, EGF, PIK3R1, AKT2	120	63	5085	9.41667	2.05e-07	5.13e-08	1.54e-06
KEGG_PATHWAY	hsa04062:Chemokine signaling pathway	21	16.6667	7.6e-09	ADCY3, PIK3CG, ADCY2, ADCY8, PREX1, BCAR1, STAT1, VAV2, PRKCD, AKT1, PLCB4, ADCY9, SOS1, PIK3CA, PIK3R5, JAK2, SHC1, PRKACB, PLCB2, PIK3R1, AKT2	120	187	5085	4.75869	1.22e-06	2.45e-07	9.19e-06
KEGG_PATHWAY	hsa05213:Endometrial cancer	12	9.52381	1.95e-08	EGFR, PIK3CG, AKT1, SOS1, TP53, PIK3CA, PIK3R5, EGF, PTEN, PIK3R1, AKT2, APC	120	52	5085	9.77885	3.14e-06	5.23e-07	2.35e-05
KEGG_PATHWAY	hsa04510:Focal adhesion	21	16.6667	2.65e-08	EGFR, PIK3CG, BCAR1, ITGB5, VAV2, ITGB1, PTEN, AKT1, LAMA1, LAMA3, ITGA6, SOS1, COL1A2, PDGFRA, PIK3CA, PIK3R5, SHC1, EGF, THBS1, PIK3R1, AKT2	120	201	5085	4.42724	4.27e-06	6.1e-07	3.21e-05
KEGG_PATHWAY	hsa04270:Vascular smooth muscle contraction	15	11.9048	2.39e-07	ADCY3, ADCY2, ADCY8, PRKCE, CACNA1S, PRKCD, ITPR2, CYP4A11, PLCB4, ADCY9, GNAS, PRKACB, CACNA1C, PLCB2, PLA2G4E	120	112	5085	5.67522	3.85e-05	4.81e-06	0.000289
KEGG_PATHWAY	hsa05218:Melanoma	12	9.52381	5.68e-07	EGFR, PIK3CG, AKT1, FGFR1, PDGFRA, TP53, PIK3CA, PIK3R5, EGF, PTEN, PIK3R1, AKT2	120	71	5085	7.16197	9.14e-05	1.02e-05	0.000686
KEGG_PATHWAY	hsa04012:ErbB signaling pathway	13	10.3175	6.23e-07	PIK3CG, EGFR, CAMK2G, AKT1, CBLB, SOS1, PIK3CA, PIK3R5, SHC1, ABL1, EGF, PIK3R1, AKT2	120	87	5085	6.3319	0.0001	1e-05	0.000754
KEGG_PATHWAY	hsa05212:Pancreatic cancer	12	9.52381	6.57e-07	EGFR, PIK3CG, AKT1, PLD1, TP53, JAK1, PIK3CA, PIK3R5, EGF, STAT1, PIK3R1, AKT2	120	72	5085	7.0625	0.000106	9.61e-06	0.000794
KEGG_PATHWAY	hsa04540:Gap junction	13	10.3175	8.02e-07	ADCY3, EGFR, ADCY2, ADCY8, ITPR2, PLCB4, ADCY9, SOS1, PDGFRA, GNAS, PRKACB, EGF, PLCB2	120	89	5085	6.18961	0.000129	1.08e-05	0.00097
KEGG_PATHWAY	hsa05220:Chronic myeloid leukemia	12	9.52381	1e-06	PIK3CG, AKT1, CBLB, HDAC1, SOS1, TP53, PIK3CA, PIK3R5, SHC1, ABL1, PIK3R1, AKT2	120	75	5085	6.78	0.000162	1.24e-05	0.00121269
KEGG_PATHWAY	hsa04664:Fc epsilon RI signaling pathway	12	9.52381	1.5e-06	PIK3CG, AKT1, SOS1, MAP2K3, PIK3CA, PIK3R5, VAV2, PRKCE, PRKCD, PLA2G4E, PIK3R1, AKT2	120	78	5085	6.51923	0.000242	1.73e-05	0.00181509
KEGG_PATHWAY	hsa04720:Long-term potentiation	11	8.73016	3.12e-06	PLCB4, EP300, GRIN2B, ADCY8, CAMK2G, CREBBP, GRIN2A, PRKACB, CACNA1C, PLCB2, ITPR2	120	68	5085	6.85478	0.000502	3.35e-05	0.00377354
KEGG_PATHWAY	hsa05222:Small cell lung cancer	12	9.52381	3.19e-06	PIK3CG, AKT1, LAMA1, LAMA3, ITGA6, TP53, PIK3CA, PIK3R5, ITGB1, PTEN, PIK3R1, AKT2	120	84	5085	6.05357	0.000513	3.2e-05	0.00385
KEGG_PATHWAY	hsa05223:Non-small cell lung cancer	10	7.93651	3.41e-06	EGFR, PIK3CG, AKT1, SOS1, TP53, PIK3CA, PIK3R5, EGF, PIK3R1, AKT2	120	54	5085	7.84722	0.000549	3.23e-05	0.00412275
KEGG_PATHWAY	hsa04914:Progesterone-mediated oocyte maturation	12	9.52381	4.03e-06	PIK3CG, ADCY3, AKT1, ADCY2, HSP90AA1, ADCY9, ADCY8, PIK3CA, PIK3R5, PRKACB, PIK3R1, AKT2	120	86	5085	5.91279	0.000649	3.61e-05	0.00487458
KEGG_PATHWAY	hsa05211:Renal cell carcinoma	11	8.73016	4.09e-06	PIK3CG, AKT1, EP300, VHL, SOS1, CREBBP, PIK3CA, PIK3R5, TCEB1, PIK3R1, AKT2	120	70	5085	6.65893	0.000659	3.47e-05	0.00494955
KEGG_PATHWAY	hsa04722:Neurotrophin signaling pathway	14	11.1111	5.02e-06	PIK3CG, CAMK2G, TP53, PRKCD, AKT1, MAP3K5, SOS1, MAP3K1, PIK3CA, PIK3R5, SHC1, ABL1, PIK3R1, AKT2	120	124	5085	4.78427	0.000808	4.04e-05	0.00606793
KEGG_PATHWAY	hsa04020:Calcium signaling pathway	16	12.6984	1.2e-05	EGFR, ADCY3, ADCY2, NOS1, ADCY8, CAMK2G, GRIN2A, CACNA1S, ITPR2, PLCB4, ADCY9, PDGFRA, GNAS, PRKACB, CACNA1C, PLCB2	120	176	5085	3.85227	0.00193041	9.2e-05	0.0145063
KEGG_PATHWAY	hsa04910:Insulin signaling pathway	14	11.1111	1.29e-05	PIK3CG, ACACA, HK1, PCK1, AKT1, CBLB, G6PC, SOS1, PIK3CA, PIK3R5, SHC1, PRKACB, PIK3R1, AKT2	120	135	5085	4.39444	0.0020722	9.43e-05	0.0155728
KEGG_PATHWAY	hsa04916:Melanogenesis	12	9.52381	1.61e-05	ADCY3, TYR, ADCY2, PLCB4, EP300, ADCY9, ADCY8, CAMK2G, CREBBP, GNAS, PRKACB, PLCB2	120	99	5085	5.13636	0.0025848	0.000113	0.0194297
KEGG_PATHWAY	hsa05210:Colorectal cancer	11	8.73016	2.16e-05	EGFR, PIK3CG, AKT1, SOS1, PDGFRA, TP53, PIK3CA, PIK3R5, PIK3R1, AKT2, APC	120	84	5085	5.54911	0.00347589	0.000145	0.0261387
KEGG_PATHWAY	hsa04810:Regulation of actin cytoskeleton	17	13.4921	3.34e-05	EGFR, PIK3CG, FGFR1, FGFR3, BCAR1, ITGB5, VAV2, ITGB1, ITGA6, SOS1, F2, PDGFRA, PIK3CA, PIK3R5, EGF, PIK3R1, APC	120	215	5085	3.35058	0.00535742	0.000215	0.040323
KEGG_PATHWAY	hsa04010:MAPK signaling pathway	19	15.0794	3.93e-05	EGFR, FGFR1, FGFR3, MAP2K3, TP53, CACNA1S, AKT1, MAP3K5, MAP3K4, SOS1, MAP3K1, PDGFRA, NFATC4, PRKACB, CACNA1C, EGF, PLA2G4E, HSPA8, AKT2	120	267	5085	3.01545	0.00630657	0.000243	0.0474878
KEGG_PATHWAY	hsa05414:Dilated cardiomyopathy	11	8.73016	4.82e-05	ADCY3, ADCY2, ITGA6, ADCY9, ADCY8, ITGB5, GNAS, PRKACB, CACNA1C, ITGB1, CACNA1S	120	92	5085	5.06658	0.00773732	0.000288	0.0583
KEGG_PATHWAY	hsa04666:Fc gamma R-mediated phagocytosis	11	8.73016	6.37e-05	PIK3CG, AKT1, PLD1, PIK3CA, PIK3R5, VAV2, PRKCE, PRKCD, PLA2G4E, PIK3R1, AKT2	120	95	5085	4.90658	0.0102081	0.000366	0.0770058
KEGG_PATHWAY	hsa04930:Type II diabetes mellitus	8	6.34921	9.32e-05	PIK3CG, HK1, PIK3CA, PIK3R5, CACNA1C, PRKCE, PRKCD, PIK3R1	120	47	5085	7.21277	0.0149002	0.000518	0.112647
KEGG_PATHWAY	hsa04630:Jak-STAT signaling pathway	13	10.3175	0.000238	PIK3CG, CREBBP, STAT1, AKT1, CBLB, EP300, SOS1, PIK3CA, JAK1, PIK3R5, JAK2, PIK3R1, AKT2	120	155	5085	3.55403	0.0375983	0.00127663	0.287314
KEGG_PATHWAY	hsa04070:Phosphatidylinositol signaling system	9	7.14286	0.000295	PIK3CG, PLCB4, PI4KA, PIK3CA, PIK3R5, PLCB2, PTEN, PIK3R1, ITPR2	120	74	5085	5.15372	0.0463449	0.00152958	0.355641
KEGG_PATHWAY	hsa04662:B cell receptor signaling pathway	9	7.14286	0.000324	PIK3CG, AKT1, SOS1, PIK3CA, PIK3R5, NFATC4, VAV2, PIK3R1, AKT2	120	75	5085	5.085	0.0507612	0.00162664	0.39036
KEGG_PATHWAY	hsa03020:RNA polymerase	6	4.7619	0.000412	POLR1A, POLR3A, POLR1B, POLR3B, POLR2B, POLR2A	120	28	5085	9.08036	0.0641922	0.00200844	0.496875
KEGG_PATHWAY	hsa00230:Purine metabolism	12	9.52381	0.000819	ADCY3, ADCY2, ADCY9, ADCY8, POLD1, POLE, POLR1A, POLR3A, POLR1B, POLR3B, POLR2B, POLR2A	120	153	5085	3.32353	0.123637	0.00387409	0.985962
KEGG_PATHWAY	hsa04660:T cell receptor signaling pathway	10	7.93651	0.00087	PIK3CG, AKT1, CBLB, SOS1, PIK3CA, PIK3R5, NFATC4, VAV2, PIK3R1, AKT2	120	108	5085	3.92361	0.130686	0.00399345	1.04598
KEGG_PATHWAY	hsa04210:Apoptosis	9	7.14286	0.000887	PIK3CG, AKT1, TP53, PIK3CA, PIK3R5, PRKACB, ATM, PIK3R1, AKT2	120	87	5085	4.38362	0.133143	0.00396107	1.06701
KEGG_PATHWAY	hsa04370:VEGF signaling pathway	8	6.34921	0.00171397	PIK3CG, AKT1, PIK3CA, PIK3R5, NFATC4, PLA2G4E, PIK3R1, AKT2	120	75	5085	4.52	0.241328	0.00743667	2.05222
KEGG_PATHWAY	hsa05221:Acute myeloid leukemia	7	5.55556	0.00217038	PIK3CG, AKT1, SOS1, PIK3CA, PIK3R5, PIK3R1, AKT2	120	58	5085	5.11422	0.295178	0.0091633	2.59216
KEGG_PATHWAY	hsa05016:Huntington's disease	12	9.52381	0.00304294	PLCB4, EP300, GRIN2B, HDAC1, CREBBP, TP53, CLTC, PLCB2, CLTCL1, NDUFS1, POLR2B, POLR2A	120	180	5085	2.825	0.387778	0.0125022	3.61681
KEGG_PATHWAY	hsa00400:Phenylalanine, tyrosine and tryptophan biosynthesis	3	2.38095	0.00518586	GOT2, GOT1, PAH	120	5	5085	25.425	0.567034	0.0207099	6.09142
KEGG_PATHWAY	hsa00240:Pyrimidine metabolism	8	6.34921	0.00650036	POLD1, POLE, POLR1A, POLR3A, POLR1B, POLR3B, POLR2B, POLR2A	120	95	5085	3.56842	0.650053	0.025284	7.5804
KEGG_PATHWAY	hsa04150:mTOR signaling pathway	6	4.7619	0.00697195	PIK3CG, AKT1, PIK3CA, PIK3R5, PIK3R1, AKT2	120	52	5085	4.88942	0.675807	0.026463	8.10929
KEGG_PATHWAY	hsa05014:Amyotrophic lateral sclerosis (ALS)	6	4.7619	0.0075572	MAP3K5, NOS1, GRIN2B, MAP2K3, GRIN2A, TP53	120	53	5085	4.79717	0.705162	0.0280034	8.76178
KEGG_PATHWAY	hsa00562:Inositol phosphate metabolism	6	4.7619	0.00817587	PIK3CG, PLCB4, PI4KA, PIK3CA, PLCB2, PTEN	120	54	5085	4.70833	0.733325	0.0295925	9.44691
KEGG_PATHWAY	hsa04310:Wnt signaling pathway	10	7.93651	0.00847112	PLCB4, EP300, CAMK2G, CREBBP, TP53, NFATC4, PRKACB, PLCB2, CUL1, APC	120	151	5085	2.80629	0.745807	0.0299784	9.77222
KEGG_PATHWAY	hsa04620:Toll-like receptor signaling pathway	8	6.34921	0.009021	PIK3CG, AKT1, MAP2K3, PIK3CA, PIK3R5, STAT1, PIK3R1, AKT2	120	101	5085	3.35644	0.767525	0.0312191	10.3752
KEGG_PATHWAY	hsa04512:ECM-receptor interaction	7	5.55556	0.0133401	LAMA1, LAMA3, ITGA6, COL1A2, ITGB5, THBS1, ITGB1	120	84	5085	3.53125	0.884929	0.0449623	14.9845
KEGG_PATHWAY	hsa04114:Oocyte meiosis	8	6.34921	0.0140563	ADCY3, ADCY2, ADCY9, ADCY8, CAMK2G, PRKACB, CUL1, ITPR2	120	110	5085	3.08182	0.897627	0.0463722	15.7275
KEGG_PATHWAY	hsa00500:Starch and sucrose metabolism	5	3.96825	0.0160868	G6PC, GUSB, SI, HK1, UGT2A1	120	42	5085	5.04464	0.926541	0.0518915	17.8015
KEGG_PATHWAY	hsa05219:Bladder cancer	5	3.96825	0.0160868	EGFR, FGFR3, TP53, EGF, THBS1	120	42	5085	5.04464	0.926541	0.0518915	17.8015
KEGG_PATHWAY	hsa04920:Adipocytokine signaling pathway	6	4.7619	0.0196539	AKT1, G6PC, JAK2, ACSL6, PCK1, AKT2	120	67	5085	3.79478	0.959066	0.0619159	21.3322
KEGG_PATHWAY	hsa04730:Long-term depression	6	4.7619	0.0220477	NOS1, PLCB4, GNAS, PLCB2, PLA2G4E, ITPR2	120	69	5085	3.68478	0.972385	0.0679608	23.623
KEGG_PATHWAY	hsa04650:Natural killer cell mediated cytotoxicity	8	6.34921	0.0355079	PIK3CG, SOS1, PIK3CA, PIK3R5, NFATC4, SHC1, VAV2, PIK3R1	120	133	5085	2.54887	0.997035	0.1059	35.4038
KEGG_PATHWAY	hsa05010:Alzheimer's disease	9	7.14286	0.0363419	NOS1, PLCB4, GRIN2B, GRIN2A, CACNA1C, PLCB2, CACNA1S, NDUFS1, ITPR2	120	163	5085	2.33972	0.99742	0.106361	36.0758
KEGG_PATHWAY	hsa05110:Vibrio cholerae infection	5	3.96825	0.0411967	ADCY3, ADCY9, GNAS, PRKACB, ATP6V1B1	120	56	5085	3.78348	0.998856	0.117882	39.8617
KEGG_PATHWAY	hsa00010:Glycolysis / Gluconeogenesis	5	3.96825	0.0509816	G6PC, ALDOB, HK1, ACSS2, PCK1	120	60	5085	3.53125	0.999781	0.142021	46.8746
KEGG_PATHWAY	hsa04670:Leukocyte transendothelial migration	7	5.55556	0.0573589	PIK3CG, BCAR1, PIK3CA, PIK3R5, VAV2, ITGB1, PIK3R1	120	118	5085	2.51377	0.999926	0.156188	51.0327
KEGG_PATHWAY	hsa04144:Endocytosis	9	7.14286	0.0655169	EGFR, PLD1, CBLB, FGFR3, PDGFRA, EGF, CLTC, CLTCL1, HSPA8	120	184	5085	2.07269	0.999982	0.174196	55.9166
KEGG_PATHWAY	hsa04960:Aldosterone-regulated sodium reabsorption	4	3.1746	0.07006	PIK3CG, PIK3CA, PIK3R5, PIK3R1	120	41	5085	4.13415	0.999992	0.182599	58.4385
KEGG_PATHWAY	hsa04110:Cell cycle	7	5.55556	0.0717482	EP300, HDAC1, CREBBP, TP53, ABL1, ATM, CUL1	120	125	5085	2.373	0.999994	0.183857	59.3413
KEGG_PATHWAY	hsa00350:Tyrosine metabolism	4	3.1746	0.082835	GOT2, TYR, GOT1, AOX1	120	44	5085	3.85227	0.999999	0.207072	64.8379
KEGG_PATHWAY	hsa00360:Phenylalanine metabolism	3	2.38095	0.0925967	GOT2, GOT1, PAH	120	22	5085	5.77841	1	0.226214	69.104

## Sheet: THCA
Table S4 The enriched KEGG pathways in THCA
Category	Term	Count	%	PValue	Genes	List Total	Pop Hits	Pop Total	Fold Enrichment	Bonferroni	Benjamini	FDR
KEGG_PATHWAY	hsa04720:Long-term potentiation	13	14.6067	7.34e-10	HRAS, BRAF, CAMK2G, ITPR2, NRAS, PLCB3, EP300, KRAS, GRIN2B, GNAQ, PRKACA, PLCB1, CAMK2A	86	68	5085	11.3039	1.07e-07	1.07e-07	8.73e-07
KEGG_PATHWAY	hsa04916:Melanogenesis	13	14.6067	6.14e-08	NRAS, HRAS, PLCB3, EP300, KRAS, GNAQ, CAMK2G, GNAS, PRKACA, PLCB1, CAMK2A, TUBB3, CTNNB1	86	99	5085	7.76427	8.96e-06	4.48e-06	7.3e-05
KEGG_PATHWAY	hsa04912:GnRH signaling pathway	12	13.4831	5.07e-07	NRAS, HRAS, PLCB3, KRAS, GNAQ, CAMK2G, MAPK9, GNAS, PRKACA, PLCB1, CAMK2A, ITPR2	86	98	5085	7.24015	7.4e-05	2.47e-05	0.000602
KEGG_PATHWAY	hsa05214:Glioma	10	11.236	7.53e-07	AKT1, NRAS, HRAS, KRAS, BRAF, CAMK2G, PIK3CA, RB1, CAMK2A, PTEN	86	63	5085	9.38538	0.00011	2.75e-05	0.000894
KEGG_PATHWAY	hsa04012:ErbB signaling pathway	11	12.3596	1.4e-06	AKT1, NRAS, HRAS, PTK2, KRAS, PAK2, BRAF, CAMK2G, MAPK9, PIK3CA, CAMK2A	86	87	5085	7.47594	0.000204	4.08e-05	0.00165937
KEGG_PATHWAY	hsa04730:Long-term depression	10	11.236	1.66e-06	NRAS, HRAS, PLCB3, KRAS, GNAQ, BRAF, GNAS, PRKG1, PLCB1, ITPR2	86	69	5085	8.56926	0.000242	4.04e-05	0.00197404
KEGG_PATHWAY	hsa04540:Gap junction	11	12.3596	1.73e-06	NRAS, HRAS, PLCB3, KRAS, GNAQ, GNAS, PRKACA, PRKG1, PLCB1, TUBB3, ITPR2	86	89	5085	7.30794	0.000252	3.6e-05	0.00205254
KEGG_PATHWAY	hsa05215:Prostate cancer	11	12.3596	1.73e-06	AKT1, CCNE1, NRAS, HRAS, EP300, KRAS, BRAF, PIK3CA, RB1, PTEN, CTNNB1	86	89	5085	7.30794	0.000252	3.6e-05	0.00205254
KEGG_PATHWAY	hsa05211:Renal cell carcinoma	9	10.1124	1.78e-05	AKT1, NRAS, HRAS, EP300, KRAS, PAK2, BRAF, PIK3CA, PTPN11	86	70	5085	7.60216	0.00259004	0.000324	0.0211106
KEGG_PATHWAY	hsa05213:Endometrial cancer	8	8.98876	2.07e-05	AKT1, NRAS, HRAS, KRAS, BRAF, PIK3CA, PTEN, CTNNB1	86	52	5085	9.0966	0.00301653	0.000336	0.0245916
KEGG_PATHWAY	hsa05218:Melanoma	8	8.98876	0.000159	AKT1, NRAS, HRAS, KRAS, BRAF, PIK3CA, RB1, PTEN	86	71	5085	6.6623	0.022976	0.0023217	0.18905
KEGG_PATHWAY	hsa04722:Neurotrophin signaling pathway	10	11.236	0.000197	AKT1, NRAS, HRAS, KRAS, BRAF, CAMK2G, MAPK9, PIK3CA, CAMK2A, PTPN11	86	124	5085	4.76838	0.028338	0.00260998	0.233757
KEGG_PATHWAY	hsa04070:Phosphatidylinositol signaling system	8	8.98876	0.000207	PLCB3, PLCE1, PIK3C2A, PIK3CA, DGKI, PLCB1, PTEN, ITPR2	86	74	5085	6.39221	0.0297562	0.00251416	0.245619
KEGG_PATHWAY	hsa05220:Chronic myeloid leukemia	8	8.98876	0.000225	AKT1, NRAS, HRAS, KRAS, BRAF, PIK3CA, RB1, PTPN11	86	75	5085	6.30698	0.0323376	0.00252542	0.267252
KEGG_PATHWAY	hsa05223:Non-small cell lung cancer	7	7.86517	0.000248	AKT1, NRAS, HRAS, KRAS, BRAF, PIK3CA, RB1	86	54	5085	7.66473	0.035593	0.00258536	0.294609
KEGG_PATHWAY	hsa05221:Acute myeloid leukemia	7	7.86517	0.000369	AKT1, NRAS, HRAS, KRAS, BRAF, PML, PIK3CA	86	58	5085	7.13613	0.0524261	0.00358359	0.437434
KEGG_PATHWAY	hsa00983:Drug metabolism	6	6.74157	0.000677	UGT1A6, CYP2A13, CES1, UGT1A3, UGT2B28, UGT2B7, TK1	86	43	5085	8.25041	0.0941948	0.00616411	0.802159
KEGG_PATHWAY	hsa00140:Steroid hormone biosynthesis	6	6.74157	0.000927	UGT1A6, CYP11A1, UGT1A3, CYP11B1, UGT2B28, AKR1D1, UGT2B7	86	46	5085	7.71234	0.126697	0.00793728	1.09681
KEGG_PATHWAY	hsa05216:Thyroid cancer	5	5.61798	0.00125579	NRAS, HRAS, KRAS, BRAF, CTNNB1	86	29	5085	10.1945	0.167615	0.0101405	1.48245
KEGG_PATHWAY	hsa00562:Inositol phosphate metabolism	6	6.74157	0.00192738	PLCB3, PLCE1, PIK3C2A, PIK3CA, PLCB1, PTEN	86	54	5085	6.56977	0.245476	0.0147153	2.26696
KEGG_PATHWAY	hsa00830:Retinol metabolism	6	6.74157	0.00192738	UGT1A6, CYP2A13, UGT1A3, ADH4, ADH7, UGT2B28, UGT2B7	86	54	5085	6.56977	0.245476	0.0147153	2.26696
KEGG_PATHWAY	hsa04020:Calcium signaling pathway	10	11.236	0.00248264	CD38, PLCB3, PLCE1, GNAQ, CAMK2G, GNAS, PRKACA, PLCB1, CAMK2A, ITPR2	86	176	5085	3.35954	0.304355	0.0179822	2.91127
KEGG_PATHWAY	hsa04270:Vascular smooth muscle contraction	8	8.98876	0.00249846	PLCB3, GNAQ, BRAF, GNAS, PRKACA, PRKG1, PLCB1, ITPR2	86	112	5085	4.22342	0.305964	0.0172416	2.92957
KEGG_PATHWAY	hsa05200:Pathways in cancer	14	15.7303	0.00282717	HRAS, BRAF, PML, RB1, PTEN, CTNNB1, AKT1, NRAS, CCNE1, PTK2, EP300, KRAS, PIK3CA, MAPK9	86	328	5085	2.52375	0.33857	0.0186133	3.30908
KEGG_PATHWAY	hsa04914:Progesterone-mediated oocyte maturation	7	7.86517	0.00295199	AKT1, KRAS, BRAF, MAPK9, PIK3CA, PRKACA, CDC27	86	86	5085	4.81274	0.350549	0.0185914	3.45285
KEGG_PATHWAY	hsa00150:Androgen and estrogen metabolism	5	5.61798	0.00315496	UGT1A6, UGT1A3, CYP11B1, UGT2B28, AKR1D1, UGT2B7	86	37	5085	7.99026	0.36957	0.0190394	3.6862
KEGG_PATHWAY	hsa00982:Drug metabolism	6	6.74157	0.0035531	UGT1A6, CYP2A13, UGT1A3, ADH4, ADH7, UGT2B28, UGT2B7	86	62	5085	5.72206	0.405287	0.0205725	4.14242
KEGG_PATHWAY	hsa04062:Chemokine signaling pathway	10	11.236	0.00373606	AKT1, NRAS, HRAS, PLCB3, PTK2, KRAS, BRAF, PIK3CA, PRKACA, PLCB1	86	187	5085	3.16192	0.42102	0.0207994	4.35141
KEGG_PATHWAY	hsa05219:Bladder cancer	5	5.61798	0.00501914	NRAS, HRAS, KRAS, BRAF, RB1	86	42	5085	7.03904	0.520322	0.026842	5.80534
KEGG_PATHWAY	hsa05010:Alzheimer's disease	9	10.1124	0.00554641	SDHA, PLCB3, GNAQ, GRIN2B, NDUFA6, CYC1, COX4I1, PLCB1, ITPR2	86	163	5085	3.26473	0.556044	0.0285846	6.39693
KEGG_PATHWAY	hsa05212:Pancreatic cancer	6	6.74157	0.00674573	AKT1, KRAS, BRAF, MAPK9, PIK3CA, RB1	86	72	5085	4.92733	0.627759	0.0335023	7.72991
KEGG_PATHWAY	hsa04910:Insulin signaling pathway	8	8.98876	0.00701512	AKT1, NRAS, HRAS, KRAS, BRAF, MAPK9, PIK3CA, PRKACA	86	135	5085	3.50388	0.642213	0.0336803	8.02691
KEGG_PATHWAY	hsa04370:VEGF signaling pathway	6	6.74157	0.00800352	AKT1, NRAS, HRAS, PTK2, KRAS, PIK3CA	86	75	5085	4.73023	0.690629	0.0371385	9.10917
KEGG_PATHWAY	hsa04660:T cell receptor signaling pathway	7	7.86517	0.00898008	AKT1, NRAS, HRAS, KRAS, PAK2, MAPK9, PIK3CA	86	108	5085	3.83236	0.732066	0.0403213	10.167
KEGG_PATHWAY	hsa04664:Fc epsilon RI signaling pathway	6	6.74157	0.00941618	AKT1, NRAS, HRAS, KRAS, MAPK9, PIK3CA	86	78	5085	4.5483	0.748742	0.0409929	10.6357
KEGG_PATHWAY	hsa05016:Huntington's disease	9	10.1124	0.0099176	SDHA, PLCB3, EP300, GNAQ, GRIN2B, NDUFA6, CYC1, COX4I1, PLCB1	86	180	5085	2.9564	0.766646	0.0418969	11.1719
KEGG_PATHWAY	hsa04310:Wnt signaling pathway	8	8.98876	0.0126207	PLCB3, EP300, CAMK2G, MAPK9, PRKACA, PLCB1, CAMK2A, CTNNB1	86	151	5085	3.1326	0.843444	0.0516022	14.0119
KEGG_PATHWAY	hsa05222:Small cell lung cancer	6	6.74157	0.0127408	AKT1, CCNE1, PTK2, PIK3CA, RB1, PTEN	86	84	5085	4.22342	0.8462	0.0506738	14.1361
KEGG_PATHWAY	hsa05210:Colorectal cancer	6	6.74157	0.0127408	AKT1, KRAS, BRAF, MAPK9, PIK3CA, CTNNB1	86	84	5085	4.22342	0.8462	0.0506738	14.1361
KEGG_PATHWAY	hsa00020:Citrate cycle (TCA cycle)	4	4.49438	0.0144614	SDHA, OGDHL, CS, SUCLA2	86	31	5085	7.62941	0.880779	0.0558597	15.898
KEGG_PATHWAY	hsa00860:Porphyrin and chlorophyll metabolism	4	4.49438	0.0171392	UGT1A6, UGT1A3, EPRS, UGT2B28, UGT2B7	86	33	5085	7.16702	0.919863	0.0642637	18.5743
KEGG_PATHWAY	hsa00980:Metabolism of xenobiotics by cytochrome P450	5	5.61798	0.0174345	UGT1A6, UGT1A3, ADH4, ADH7, UGT2B28, UGT2B7	86	60	5085	4.92733	0.923303	0.0637225	18.8646
KEGG_PATHWAY	hsa04510:Focal adhesion	9	10.1124	0.0183792	AKT1, HRAS, PTK2, PAK2, BRAF, MAPK9, PIK3CA, PTEN, CTNNB1	86	201	5085	2.64752	0.933352	0.065467	19.787
KEGG_PATHWAY	hsa04650:Natural killer cell mediated cytotoxicity	7	7.86517	0.0231539	NRAS, ITGAL, HRAS, KRAS, BRAF, PIK3CA, PTPN11	86	133	5085	3.112	0.967295	0.0800355	24.3036
KEGG_PATHWAY	hsa00053:Ascorbate and aldarate metabolism	3	3.37079	0.0319199	UGT1A6, UGT1A3, UGT2B28, UGT2B7	86	17	5085	10.4343	0.991229	0.106643	31.9944
KEGG_PATHWAY	hsa00500:Starch and sucrose metabolism	4	4.49438	0.0324056	UGT1A6, UGT1A3, MGAM, UGT2B28, UGT2B7	86	42	5085	5.63123	0.991849	0.105822	32.3989
KEGG_PATHWAY	hsa00040:Pentose and glucuronate interconversions	3	3.37079	0.0355263	UGT1A6, UGT1A3, UGT2B28, UGT2B7	86	18	5085	9.85465	0.994914	0.113104	34.9453
KEGG_PATHWAY	hsa04662:B cell receptor signaling pathway	5	5.61798	0.0360372	AKT1, NRAS, HRAS, KRAS, PIK3CA	86	75	5085	3.94186	0.995292	0.112263	35.3537
KEGG_PATHWAY	hsa04114:Oocyte meiosis	6	6.74157	0.0361416	CCNE1, CAMK2G, PRKACA, CDC27, CAMK2A, ITPR2	86	110	5085	3.22516	0.995366	0.110268	35.4369
KEGG_PATHWAY	hsa04810:Regulation of actin cytoskeleton	8	8.98876	0.0668453	NRAS, ITGAL, HRAS, PTK2, KRAS, PAK2, BRAF, PIK3CA	86	215	5085	2.20011	0.999959	0.193388	56.0585
KEGG_PATHWAY	hsa04530:Tight junction	6	6.74157	0.0725933	AKT1, NRAS, HRAS, KRAS, PTEN, CTNNB1	86	134	5085	2.64752	0.999983	0.204854	59.1699
KEGG_PATHWAY	hsa00010:Glycolysis / Gluconeogenesis	4	4.49438	0.0781782	LDHA, ADH4, ENO3, ADH7	86	60	5085	3.94186	0.999993	0.215374	61.9985
KEGG_PATHWAY	hsa00640:Propanoate metabolism	3	3.37079	0.0992439	LDHA, EHHADH, SUCLA2	86	32	5085	5.54324	1	0.263025	71.1284
